# Supplementary material for: LION/web: a web-based ontology enrichment tool for lipidomic data analysis
Source: PubMed Central journal article supplement (PMC6541037; doi:10.1093/gigascience/giz061), 2019-05-29
Supplement: giz061_giga-d-18-00357_original_submission.pdf [file giz061_giga-d-18-00357_original_submission.pdf]

|                                                                               |                                                                                                                                                                                                                                                                                                                                                                                                                                                                                                                                                                                                                                                                                                                                                                                                                                                                                                                                                                                                                                                                                                                                                                                                                                                                                                                                                                                                                                                                                                                                                                 |
|-------------------------------------------------------------------------------|-----------------------------------------------------------------------------------------------------------------------------------------------------------------------------------------------------------------------------------------------------------------------------------------------------------------------------------------------------------------------------------------------------------------------------------------------------------------------------------------------------------------------------------------------------------------------------------------------------------------------------------------------------------------------------------------------------------------------------------------------------------------------------------------------------------------------------------------------------------------------------------------------------------------------------------------------------------------------------------------------------------------------------------------------------------------------------------------------------------------------------------------------------------------------------------------------------------------------------------------------------------------------------------------------------------------------------------------------------------------------------------------------------------------------------------------------------------------------------------------------------------------------------------------------------------------|
| <b>Manuscript Number:</b>                                                     | GIGA-D-18-00357                                                                                                                                                                                                                                                                                                                                                                                                                                                                                                                                                                                                                                                                                                                                                                                                                                                                                                                                                                                                                                                                                                                                                                                                                                                                                                                                                                                                                                                                                                                                                 |
| <b>Full Title:</b>                                                            | LION/web: a web-based ontology enrichment tool for lipidomic data analysis                                                                                                                                                                                                                                                                                                                                                                                                                                                                                                                                                                                                                                                                                                                                                                                                                                                                                                                                                                                                                                                                                                                                                                                                                                                                                                                                                                                                                                                                                      |
| <b>Article Type:</b>                                                          | Technical Note                                                                                                                                                                                                                                                                                                                                                                                                                                                                                                                                                                                                                                                                                                                                                                                                                                                                                                                                                                                                                                                                                                                                                                                                                                                                                                                                                                                                                                                                                                                                                  |
| <b>Funding Information:</b>                                                   |                                                                                                                                                                                                                                                                                                                                                                                                                                                                                                                                                                                                                                                                                                                                                                                                                                                                                                                                                                                                                                                                                                                                                                                                                                                                                                                                                                                                                                                                                                                                                                 |
| <b>Abstract:</b>                                                              | <p>A major challenge for lipidomic analyses is the handling of the large amounts of data and the translation of results to interpret the involvement of lipids in biological systems. We built a new lipid ontology (LION) that associates over 50,000 lipid species to biophysical, chemical and cell biological features. By making use of enrichment algorithms, we used LION to develop a web-based interface (LION/web, <a href="http://www.lipidontology.com">www.lipidontology.com</a>) that allows identification of lipid-associated terms in lipidomes. LION/web was validated by analyzing a lipidomic dataset derived from well-characterized sub-cellular fractions of RAW 264.7 macrophages. Comparison of isolated plasma membranes with the microsomal fraction showed a significant enrichment of relevant LION-terms including 'plasma membrane', 'headgroup with negative charge', 'glycerophosphoserines', 'above average bilayer thickness', and 'below average lateral diffusion'. A second validation was performed by analyzing the membrane fluidity of CHO cells incubated with arachidonic acid. An increase in membrane fluidity was observed both experimentally by using pyrene decanoic acid and by using LION/web, showing significant enrichment of terms associated with high membrane fluidity ('above average', 'very high' and 'high lateral diffusion', and 'below average transition temperature'). The results demonstrate the functionality of LION/web, which is freely accessible in a platform-independent way.</p> |
| <b>Corresponding Author:</b>                                                  | <p>Bernd Helms</p> <p>NETHERLANDS</p>                                                                                                                                                                                                                                                                                                                                                                                                                                                                                                                                                                                                                                                                                                                                                                                                                                                                                                                                                                                                                                                                                                                                                                                                                                                                                                                                                                                                                                                                                                                           |
| <b>Corresponding Author Secondary Information:</b>                            |                                                                                                                                                                                                                                                                                                                                                                                                                                                                                                                                                                                                                                                                                                                                                                                                                                                                                                                                                                                                                                                                                                                                                                                                                                                                                                                                                                                                                                                                                                                                                                 |
| <b>Corresponding Author's Institution:</b>                                    |                                                                                                                                                                                                                                                                                                                                                                                                                                                                                                                                                                                                                                                                                                                                                                                                                                                                                                                                                                                                                                                                                                                                                                                                                                                                                                                                                                                                                                                                                                                                                                 |
| <b>Corresponding Author's Secondary Institution:</b>                          |                                                                                                                                                                                                                                                                                                                                                                                                                                                                                                                                                                                                                                                                                                                                                                                                                                                                                                                                                                                                                                                                                                                                                                                                                                                                                                                                                                                                                                                                                                                                                                 |
| <b>First Author:</b>                                                          | Martijn R. Molenaar                                                                                                                                                                                                                                                                                                                                                                                                                                                                                                                                                                                                                                                                                                                                                                                                                                                                                                                                                                                                                                                                                                                                                                                                                                                                                                                                                                                                                                                                                                                                             |
| <b>First Author Secondary Information:</b>                                    |                                                                                                                                                                                                                                                                                                                                                                                                                                                                                                                                                                                                                                                                                                                                                                                                                                                                                                                                                                                                                                                                                                                                                                                                                                                                                                                                                                                                                                                                                                                                                                 |
| <b>Order of Authors:</b>                                                      | <p>Martijn R. Molenaar</p> <p>Aike Jeucken</p> <p>Tsjerk A. Wassenaar</p> <p>Chris H. A. van de Lest</p> <p>Jos F. Brouwers</p> <p>Bernd Helms</p>                                                                                                                                                                                                                                                                                                                                                                                                                                                                                                                                                                                                                                                                                                                                                                                                                                                                                                                                                                                                                                                                                                                                                                                                                                                                                                                                                                                                              |
| <b>Order of Authors Secondary Information:</b>                                |                                                                                                                                                                                                                                                                                                                                                                                                                                                                                                                                                                                                                                                                                                                                                                                                                                                                                                                                                                                                                                                                                                                                                                                                                                                                                                                                                                                                                                                                                                                                                                 |
| <b>Additional Information:</b>                                                |                                                                                                                                                                                                                                                                                                                                                                                                                                                                                                                                                                                                                                                                                                                                                                                                                                                                                                                                                                                                                                                                                                                                                                                                                                                                                                                                                                                                                                                                                                                                                                 |
| <b>Question</b>                                                               | <b>Response</b>                                                                                                                                                                                                                                                                                                                                                                                                                                                                                                                                                                                                                                                                                                                                                                                                                                                                                                                                                                                                                                                                                                                                                                                                                                                                                                                                                                                                                                                                                                                                                 |
| Are you submitting this manuscript to a special series or article collection? | No                                                                                                                                                                                                                                                                                                                                                                                                                                                                                                                                                                                                                                                                                                                                                                                                                                                                                                                                                                                                                                                                                                                                                                                                                                                                                                                                                                                                                                                                                                                                                              |
| <b>Experimental design and statistics</b>                                     | Yes                                                                                                                                                                                                                                                                                                                                                                                                                                                                                                                                                                                                                                                                                                                                                                                                                                                                                                                                                                                                                                                                                                                                                                                                                                                                                                                                                                                                                                                                                                                                                             |

|                                                                                                                                                                                                                                                                                                                                                                                                                                                                                                                                                         |            |
|---------------------------------------------------------------------------------------------------------------------------------------------------------------------------------------------------------------------------------------------------------------------------------------------------------------------------------------------------------------------------------------------------------------------------------------------------------------------------------------------------------------------------------------------------------|------------|
| <p>Full details of the experimental design and statistical methods used should be given in the Methods section, as detailed in our <a href="#">Minimum Standards Reporting Checklist</a>. Information essential to interpreting the data presented should be made available in the figure legends.</p> <p>Have you included all the information requested in your manuscript?</p>                                                                                                                                                                       |            |
| <p><b>Resources</b></p> <p>A description of all resources used, including antibodies, cell lines, animals and software tools, with enough information to allow them to be uniquely identified, should be included in the Methods section. Authors are strongly encouraged to cite <a href="#">Research Resource Identifiers</a> (RRIDs) for antibodies, model organisms and tools, where possible.</p> <p>Have you included the information requested as detailed in our <a href="#">Minimum Standards Reporting Checklist</a>?</p>                     | <p>Yes</p> |
| <p><b>Availability of data and materials</b></p> <p>All datasets and code on which the conclusions of the paper rely must be either included in your submission or deposited in <a href="#">publicly available repositories</a> (where available and ethically appropriate), referencing such data using a unique identifier in the references and in the “Availability of Data and Materials” section of your manuscript.</p> <p>Have you have met the above requirement as detailed in our <a href="#">Minimum Standards Reporting Checklist</a>?</p> | <p>Yes</p> |

[Click here to view linked References](#)

1  
2  
3  
4  
5  
6  
7  
8  
9  
10  
11  
12  
13  
14  
15  
16  
17  
18  
19  
20  
21  
22  
23  
24  
25  
26  
27  
28  
29  
30  
31  
32  
33  
34  
35  
36  
37  
38  
39  
40  
41  
42  
43  
44  
45  
46  
47  
48  
49  
50  
51  
52  
53  
54  
55  
56  
57  
58  
59  
60  
61  
62  
63  
64  
65

# **LION/web: a web-based ontology enrichment tool for lipidomic data analysis**

Martijn R. Molenaar<sup>§</sup>, Aike Jeucken<sup>§</sup>, Tsjerk A. Wassenaar<sup>‡</sup>, Chris H. A. van de Lest<sup>§</sup>, Jos F.

Brouwers<sup>§</sup>, J. Bernd Helms<sup>\*§</sup>

<sup>§</sup> Department of Biochemistry and Cell Biology, Faculty of Veterinary Medicine, Utrecht  
University, 3584 CM, Utrecht, The Netherlands

<sup>‡</sup> Groningen Biomolecular Sciences and Biotechnology Institute and Zernike Institute for  
Advanced Materials, University of Groningen, Nijenborgh 7, 9747 AG Groningen, The  
Netherlands

\* To whom correspondence should be addressed: J.B.H (J.B.Helms@uu.nl)

1 **ABSTRACT**

2 **A major challenge for lipidomic analyses is the handling of the large amounts of data**  
3 **and the translation of results to interpret the involvement of lipids in biological systems.**  
4 **We built a new lipid ontology (LION) that associates over 50,000 lipid species to**  
5 **biophysical, chemical and cell biological features. By making use of enrichment**  
6 **algorithms, we used LION to develop a web-based interface (LION/web,**  
7 **[www.lipidontology.com](http://www.lipidontology.com)) that allows identification of lipid-associated terms in lipidomes.**  
8 **LION/web was validated by analyzing a lipidomic dataset derived from well-**  
9 **characterized sub-cellular fractions of RAW 264.7 macrophages. Comparison of isolated**  
10 **plasma membranes with the microsomal fraction showed a significant enrichment of**  
11 **relevant LION-terms including ‘plasma membrane’, ‘headgroup with negative charge,**  
12 **‘glycerophosphoserines’, ‘above average bilayer thickness’, and ‘below average lateral**  
13 **diffusion’. A second validation was performed by analyzing the membrane fluidity of**  
14 **CHO cells incubated with arachidonic acid. An increase in membrane fluidity was**  
15 **observed both experimentally by using pyrene decanoic acid and by using LION/web,**  
16 **showing significant enrichment of terms associated with high membrane fluidity (‘above**  
17 **average’, ‘very high’ and ‘high lateral diffusion’, and ‘below average transition**  
18 **temperature’). The results demonstrate the functionality of LION/web, which is freely**  
19 **accessible in a platform-independent way.**

20  
21 **KEYWORDS**

22 lipidomics; lipids; membrane biology; lipid ontology; LION; LION-term enrichment analysis;  
23 membrane biology; web-tool; data analysis; LION/web

25 **FINDINGS**

26 The comprehensive study of lipids, also termed lipidomics, is gaining momentum.  
27 Instrumentation is becoming increasingly more sensitive, precise and fast, and the use of  
28 lipidomics to address key questions in membrane biology has become widespread. As a result,  
29 datasets are rapidly increasing both in terms of size and complexity. Due to a lack of methods  
30 to perform global and in-depth data mining, lipidomic research tends to focus on individual  
31 lipid classes or lipid species. A common approach in other ‘omics’ disciplines to reduce  
32 complexity is the use of ontologies *e.g.*, Gene Ontology (Ashburner et al., 2000), Chemical  
33 Entities of Biological Interest ontology (Degtyarenko et al., 2008), combined with statistical  
34 tools to determine terms of interest.

35 Although lipid structure is closely related to lipid function, it is currently impossible to  
36 associate properties of individual lipids with complex lipid mixtures of cellular lipidomes.  
37 Examples of biophysical properties that play an important role in membrane biology are  
38 numerous and include membrane thickness as driving force in the sub-cellular localization of  
39 proteins (Sharpe et al., 2010), membrane fluidity regulating bacterial survival (Inda et al.,  
40 2014), membrane heterogeneity in cellular signaling (Sezgin et al., 2017), intrinsic curvature  
41 of lipids as key player in lipid droplet biogenesis (Ben M’barek et al., 2017; Thiam et al.,  
42 2013) or COPI coat disassembly (Bigay et al., 2003), and net charge of membranes as a  
43 determinant in lipid-protein interactions (Enkavi et al., 2017).

44 Here, we aim to provide a lipid ontology database and complementary enrichment analysis  
45 tool that (i) contains chemical and biophysical information of lipid species, (ii) is platform  
46 independent and compatible with routine mass spectrometry-based lipid analysis, (iii) can be  
47 used by researchers without computer programming skills, and (iv) is freely available to the  
48 scientific community.

49 We constructed an ontology database called LION (File S1) that links over 50,000 lipid  
50 species with four major branches: ‘lipid classification’ (Fahy et al., 2009), ‘chemical and  
51 physical properties’ (fatty acid length and unsaturation, headgroup charge, intrinsic curvature,

1  
2  
3  
4  
5  
6  
7  
8  
9  
10  
11  
12  
13  
14  
15  
16  
17  
18  
19  
20  
21  
22  
23  
24  
25  
26  
27  
28  
29  
30  
31  
32  
33  
34  
35  
36  
37  
38  
39  
40  
41  
42  
43  
44  
45  
46  
47  
48  
49  
50  
51  
52 membrane fluidity, bilayer thickness), ‘function’, and ‘subcellular localization’ (as described  
53 in literature). The resulting database contains more than 250,000 connections (‘edges’),  
54 providing a detailed system for in-depth annotation of lipids. An example of all LION-terms  
55 associated with a single phosphatidylserine (PS) lipid species, PS(34:2), is depicted in **Figure**  
56 **S1**.

57 An important feature of LION is the association of lipid species with biophysical properties.  
58 We made use of experimental data ([Marsh, 2010](#)) and data obtained by coarse-grain molecular  
59 dynamics simulation (CG-MD) ([Wassenaar et al., 2015](#)), each providing distinct biophysical  
60 properties. These data were used to estimate the biophysical properties of all related lipids in  
61 the LION-database by multiple regression analysis.

62 The regression models were validated in two ways. First, we performed leave-one-out cross-  
63 validations (LOOCV) of all three models (**Fig. S2 A-C**), showing satisfactory agreement  
64 between determined and predicted values. Second, we compared two properties closely  
65 associated with membrane fluidity: ‘transition temperature’ (from experimental datasets) and  
66 ‘lateral diffusion’ (from the CG-MD datasets) (**Fig. S2 D**). As expected, lipids with low  
67 transition temperatures were predicted to have high lateral diffusion values at a defined  
68 simulation temperature and vice versa.

69 Subsequently, all numerical datapoints for each biophysical property were categorized into  
70 five pre-defined groups (‘very low’, ‘low’, ‘average’, ‘high’, ‘very high’). The limits of each  
71 group were determined based on the presence of lipid species reported in four lipidomics  
72 publications ([Andreyev et al., 2010](#); [Haraszti et al., 2016](#); [Köberlin et al., 2015](#); [Lin et al.,](#)  
73 [2017](#)). These values were subsequently used to categorize all applicable lipid species present  
74 in LION (**Fig. S2 E**).

75 Next, we used LION as a basis to build an ontology enrichment tool that facilitates reduction  
76 of lipidome complexities in an unbiased manner. We made use of an adapted version of  
77 ‘topGO’, an R-package designed for enrichment analysis of GO-terms ([Alexa and](#)  
78 [Rahnenfuhrer, 2017](#)). Subsequently, we designed a web-tool with R-package Shiny

1  
2  
3  
4  
5  
6  
7  
8  
9  
10  
11  
12  
13  
14  
15  
16  
17  
18  
19  
20  
21  
22  
23  
24  
25  
26  
27  
28  
29  
30  
31  
32  
33  
34  
35  
36  
37  
38  
39  
40  
41  
42  
43  
44  
45  
46  
47  
48  
49  
50  
51  
52  
53  
54  
55  
56  
57  
58  
59  
60  
61  
62  
63  
64  
65

79 ('LION/web', [www.lipidontology.com](http://www.lipidontology.com)) that offers an intuitive user-interface and supports two  
80 major workflows (**Fig. 1 and Note S1**): enrichment analysis of a subset of lipids of interest  
81 ('by target list') and enrichment analysis performed on a complete and ranked list of lipids  
82 ('by ranking', referred to as 'SAFE' in the context of genes ([Barry et al., 2005](#))).  
83 To test the functionality of LION/web, we made use of a previously published and well  
84 characterized dataset containing lipidomics data from several sub-cellular fractions of RAW  
85 264.7 macrophages ([Andreyev et al., 2010](#); see Methods for a direct link to the dataset). First,  
86 we re-normalized the dataset by expressing all lipid species as fraction of the total amount of  
87 lipid per sample. LION/web was able to reformat (for information about input conventions,  
88 see **Note S2**) and match the vast majority (>97%) of the submitted lipids. Subsequently, we  
89 compared the isolated plasma membrane (PM) with the endoplasmic reticulum (ER) fraction  
90 from non-stimulated macrophages and assessed all LION-terms for enrichment (**Fig. S3**). In  
91 good agreement with current descriptions of the selected organelles ([Holthuis and Menon,](#)  
92 [2014; van Meer et al., 2008](#)), significant enriched LION-terms included terms associated with  
93 chemical descriptions (*e.g.*, 'glycerophosphoserines', 'headgroup with negative charge',  
94 'phosphosphingolipids'), biological features ('plasma membrane') and biophysical properties  
95 (*e.g.*, 'above average bilayer thickness', 'below average lateral diffusion', 'very low lateral  
96 diffusion', 'very high bilayer thickness', 'neutral intrinsic curvature'). LION/web also  
97 reported the significant enrichment of 'very high transition temperature', which is in line with  
98 the (very) low lateral diffusion terms (see also **Fig. S2 D**). Also the term 'very low transition  
99 temperature' was reported to be significantly enriched. Inspection of the lipid species  
100 responsible for the LION-term 'very low transition temperature' revealed the presence of  
101 lipids that all contain polyunsaturated fatty acids (PUFAs) with at least four unsaturations.  
102 This may be a macrophage-specific phenomenon, related to their involvement in  
103 inflammation ([Calder, 2015](#)).  
104 To further validate LION/web, we used two different experimental approaches. First, we  
105 investigated the enrichment of LION-terms associated with chemical features that can be  
106 easily incorporated into lipids (*e.g.*, fatty acids as building blocks). To this end, CHO-k1 cells

107 were incubated overnight in the presence of palmitic acid (PA), linoleic acid (LA) or  
108 arachidonic acid (AA) complexed to bovine serum albumin (BSA). Subsequently, lipids were  
109 analysed by LC-MS/MS (**Data S1** and **Fig. S4**) and submitted to LION/web ('by ranking'-  
110 mode). LION/web offers the option to limit analysis to specific terms of interest. After pre-  
111 selection of LION-terms that indicate the presence of fatty acids as lipid building blocks,  
112 LION/web reported the significant enrichment of the respective fatty acid in the three  
113 different conditions (**Fig. 2 A** and **Data S2**).

114 Second, to investigate the enrichment of biophysical LION-terms, we incubated CHO-k1 cells  
115 with arachidonic acid (AA). This procedure is known to increase membrane fluidity ([Yang et](#)  
116 [al., 2011](#)). After incubation, the membrane fluidity properties of the samples were analyzed  
117 both experimentally and by LION/web. Membrane fluidity was experimentally assessed using  
118 pyrene decanoic acid (PDA). This fluorescent probe can exist as monomer or excimer,  
119 resulting in a shift of its emission spectrum. The ratio of excimer over monomer fluorescence  
120 is proportional to the degree of membrane fluidity ([Eisinger and Scarlata, 1987](#)). To this end,  
121 fluorescence spectra of lysates from cells incubated with or without AA were measured (**Fig.**  
122 **2 B**). As expected, the ratio of excimer/monomer forms of PDA revealed a significant  
123 increase in membrane fluidity of lysates in the presence of AA (**Fig. 2 C**). For parallel  
124 LION/web analysis of membrane fluidity properties, lipids were extracted from the same  
125 samples and analysed by LC-MS/MS (**Data S3** and **Fig. S5**). LION contains two sets of terms  
126 associated with membrane fluidity: 'transition temperature' and 'lateral diffusion'.  
127 Accordingly, LION/web was set to limit enrichment analyses to these sets, after which the  
128 lipidomic data were analyzed ('by ranking' mode). In line with the experimentally measured  
129 increase in membrane fluidity, terms associated with high membrane fluidity ('above  
130 average', 'very high' and 'high lateral diffusion', and 'below average transition temperature')  
131 were significantly enriched in cells that had been treated with AA (**Fig. 2 D** and **Data S4**).

132 Taken together, we have presented a new ontology called LION that enables flexible  
133 annotation of lipid species and that covers most commonly found lipid classes and fatty acid  
134 distributions. Furthermore, it combines the well-established lipid class hierarchy from



135 LIPIDMAPS with biophysical data that were not previously available. To explore lipid  
136 datasets in an unbiased manner, we built an online web-tool that does not require knowledge  
137 of programming languages. We believe that this lipid database and associated web-tool  
138 bridges the gap between lipidomics and cell biology by revealing patterns that are of  
139 biological interest.

## 141 **ACKNOWLEDGEMENTS**

142 We thank Xin He, PhD, for providing and supporting the topONTO R-package. We thank  
143 Jeroen W.A. Jansen for the excellent technical assistance with the lipidomics experiments.

## 145 **AUTHOR CONTRIBUTIONS**

146 M.R.M. and J.B.H. conceived the project. M.R.M. developed LION, LION/web and  
147 performed the experiments. A.J. tested and suggested improvements for LION/web.  
148 C.H.A.v.d.L. and T.A.W. contributed to the regression models and statistical concepts.  
149 C.H.A.v.d.L. and J.F.B. contributed to the lipidomics data processing and analysis. M.R.M.  
150 and J.B.H. wrote the manuscript.

## 152 **COMPETING FINANCIAL INTERESTS**

153 The authors declare no competing financial interests.

## 155 **ADDITIONAL MATERIAL**

156 **Figure S1.** LION-terms associated with PS(34:2).

157 **Figure S2.** Model validations of biophysical properties in LION.

158 **Figure S3.** LION-term enrichment analysis of RAW 264.7 macrophage plasma membrane  
159 (PM) versus endoplasmic reticulum (ER) fractions.

160 **Figure S4.** Lipidomics of CHO-k1 cells incubated with free fatty acids.

161 **Figure S5.** Lipidomics of CHO-k1 cells incubated with arachidonic acid (AA).

162 **Supplementary Data 1.** CSV-file with lipidomics dataset supporting Figure 2D.

163 **Supplementary Data 2.** CSV-file with LION/web output values supporting Figure 2D.

164 **Supplementary Data 3.** CSV-file with lipidomics dataset supporting Figure 2A.

165 **Supplementary Data 4.** CSV-file with LION/web output values supporting Figure 2A.

166 **Supplementary Data 5.** CSV-file with all LION-terms and description.

167 **Supplementary Data 6.** CSV-file with test-set for lipid names conversion.

168 **Supplementary File 1.** LION-database in OBO-format.

169

## 170 **ABBREVIATIONS**

171 LION: lipid ontology; CG-MD: coarse-grain molecular dynamics simulation; LOOCV: leave-  
172 one-out cross-validations; GO: gene ontology; PUFA: polyunsaturated fatty acid; PA: palmitic  
173 acid; LA: linoleic acid; AA: arachidonic acid; BSA: bovine serum albumin; LC-MS/MS:  
174 liquid chromatography – tandem mass spectrometry; PDA: pyrene decanoic acid; CSV:  
175 comma seperated values

176

## 177 **REFERENCES**

178 Adusumilli R., Mallick P. (2017) Data Conversion with ProteoWizard msConvert. *Methods*  
179 *Mol Biol.* 1550, 339-368.

180 Aimo, L., Liechti, R., Hyka-Nouspikel, N., Niknejad, A., Gleizes, A., Götz, L., Kuznetsov,  
181 D., David, F.P.A., van der Goot, F.G., Riezman, H., et al. (2015). The SwissLipids  
182 knowledgebase for lipid biology. *Bioinforma. Oxf. Engl.* 31, 2860–6.

183 Alexa, A., and Rahnenfuhrer, J. (2017). Gene set enrichment analysis with topGO.  
184 Bioconductor.

1  
2  
3  
4  
5  
6  
7  
8  
9  
10  
11  
12  
13  
14  
15  
16  
17  
18  
19  
20  
21  
22  
23  
24  
25  
26  
27  
28  
29  
30  
31  
32  
33  
34  
35  
36  
37  
38  
39  
40  
41  
42  
43  
44  
45  
46  
47  
48  
49  
50  
51  
52  
53  
54  
55  
56  
57  
58  
59  
60  
61  
62  
63  
64  
65

185 Andreyev, A.Y., Fahy, E., Guan, Z., Kelly, S., Li, X., McDonald, J.G., Milne, S., Myers, D.,  
186 Park, H., Ryan, A., et al. (2010). Subcellular organelle lipidomics in TLR-4-activated  
187 macrophages. *J. Lipid Res.* *51*, 2785–97.

188 Ashburner, M., Ball, C.A., Blake, J.A., Botstein, D., Butler, H., Cherry, J.M., Davis, A.P.,  
189 Dolinski, K., Dwight, S.S., Eppig, J.T., et al. (2000). Gene ontology: tool for the unification  
190 of biology. The Gene Ontology Consortium. *Nat. Genet.* *25*, 25–9.

191 Barry, W.T., Nobel, A.B., and Wright, F.A. (2005). Significance analysis of functional  
192 categories in gene expression studies: a structured permutation approach. *Bioinforma. Oxf.*  
193 *Engl.* *21*, 1943–9.

194 Ben M’barek, K., Ajjaji, D., Chorlay, A., Vanni, S., Forêt, L., and Thiam, A.R. (2017). ER  
195 Membrane Phospholipids and Surface Tension Control Cellular Lipid Droplet Formation.  
196 *Dev. Cell* *41*, 591–604.e7.

197 Bigay, J., Gounon, P., Robineau, S., and Antonny, B. (2003). Lipid packing sensed by  
198 ArfGAP1 couples COPI coat disassembly to membrane bilayer curvature. *Nature* *426*, 563–6.

199 Bligh, E.G., and Dyer, W.J. (1959). A rapid method of total lipid extraction and purification.  
200 *Can. J. Biochem. Physiol.* *37*, 911–917.

201 Calder, P.C. (2015). Marine omega-3 fatty acids and inflammatory processes: Effects,  
202 mechanisms and clinical relevance. *Biochim. Biophys. Acta BBA - Mol. Cell Biol. Lipids*  
203 *1851*, 469–484.

204 Degtyarenko, K., de Matos, P., Ennis, M., Hastings, J., Zbinden, M., McNaught, A.,  
205 Alcántara, R., Darsow, M., Guedj, M., and Ashburner, M. (2008). ChEBI: a database and  
206 ontology for chemical entities of biological interest. *Nucleic Acids Res.* *36*, D344–50.

207 Eisinger, J., and Scarlata, S.F. (1987). The lateral fluidity of erythrocyte membranes  
208 temperature and pressure dependence. *Biophys. Chem.* *28*, 273–281.

209 Enkavi, G., Mikkolainen, H., Güngör, B., Ikonen, E., and Vattulainen, I. (2017). Concerted  
210 regulation of npc2 binding to endosomal/lysosomal membranes by  
211 bis(monoacylglycero)phosphate and sphingomyelin. *PLOS Comput. Biol.* *13*, e1005831.

1  
2  
3  
4  
5  
6  
7  
8  
9  
10  
11  
12  
13  
14  
15  
16  
17  
18  
19  
20  
21  
22  
23  
24  
25  
26  
27  
28  
29  
30  
31  
32  
33  
34  
35  
36  
37  
38  
39  
40  
41  
42  
43  
44  
45  
46  
47  
48  
49  
50  
51  
52  
53  
54  
55  
56  
57  
58  
59  
60  
61  
62  
63  
64  
65

212 Fahy, E., Subramaniam, S., Murphy, R.C., Nishijima, M., Raetz, C.R.H., Shimizu, T., Spener,  
213 F., van Meer, G., Wakelam, M.J.O., and Dennis, E.A. (2009). Update of the LIPID MAPS  
214 comprehensive classification system for lipids. *J. Lipid Res.* *50 Suppl*, S9–14.

215 Haraszti, R.A., Didiot, M.-C., Sapp, E., Leszyk, J., Shaffer, S.A., Rockwell, H.E., Gao, F.,  
216 Narain, N.R., DiFiglia, M., Kiebish, M.A., et al. (2016). High-resolution proteomic and  
217 lipidomic analysis of exosomes and microvesicles from different cell sources. *J. Extracell.*  
218 *Vesicles* *5*, 32570.

219 Holthuis, J.C.M., and Menon, A.K. (2014). Lipid landscapes and pipelines in membrane  
220 homeostasis. *Nature* *510*, 48–57.

221 Inda, M.E., Vandenbranden, M., Fernández, A., de Mendoza, D., Ruyschaert, J.-M., and  
222 Cybulski, L.E. (2014). A lipid-mediated conformational switch modulates the thermosensing  
223 activity of DesK. *Proc. Natl. Acad. Sci. U. S. A.* *111*, 3579–84.

224 Köberlin, M.S., Snijder, B., Heinz, L.X., Baumann, C.L., Fauster, A., Vladimer, G.I., Gavin,  
225 A.C., and Superti-Furga, G. (2015). A Conserved Circular Network of Coregulated Lipids  
226 Modulates Innate Immune Responses. *Cell* *162*, 170–183.

227 de Kroon, A.I.P.M., Rijken, P.J., and De Smet, C.H. (2013). Checks and balances in  
228 membrane phospholipid class and acyl chain homeostasis, the yeast perspective. *Prog. Lipid*  
229 *Res.* *52*, 374–94.

230 Liebisch, G., Vizcaíno, J.A., Köfeler, H., Trötz Müller, M., Griffiths, W.J., Schmitz, G.,  
231 Spener, F., and Wakelam, M.J.O. (2013). Shorthand notation for lipid structures derived from  
232 mass spectrometry. *J. Lipid Res.* *54*, 1523–30.

233 Lin, L., Ding, Y., Wang, Y., Wang, Z., Yin, X., Yan, G., Zhang, L., Yang, P., and Shen, H.  
234 (2017). Functional lipidomics: Palmitic acid impairs hepatocellular carcinoma development  
235 by modulating membrane fluidity and glucose metabolism. *Hepatology* *66*, 432–448.

236 Marrink, S.J., de Vries, A.H., and Mark, A.E. (2004). Coarse Grained Model for  
237 Semiquantitative Lipid Simulations. *J. Phys. Chem. B* *108*, 750–760.

238 Marsh, D. (2010). Structural and thermodynamic determinants of chain-melting transition  
239 temperatures for phospholipid and glycolipids membranes. *Biochim. Biophys. Acta* *1798*, 40–  
240 51.

- 1  
2  
3  
4  
5  
6  
7  
8  
9  
10  
11  
12  
13  
14  
15  
16  
17  
18  
19  
20  
21  
22  
23  
24  
25  
26  
27  
28  
29  
30  
31  
32  
33  
34  
35  
36  
37  
38  
39  
40  
41  
42  
43  
44  
45  
46  
47  
48  
49  
50  
51  
52  
53  
54  
55  
56  
57  
58  
59  
60  
61  
62  
63  
64  
65
- 241 van Meer, G., Voelker, D.R., and Feigenson, G.W. (2008). Membrane lipids: where they are  
242 and how they behave. *Nat. Rev. Mol. Cell Biol.* *9*, 112–24.
- 243 Sezgin, E., Levental, I., Mayor, S., and Eggeling, C. (2017). The mystery of membrane  
244 organization: composition, regulation and roles of lipid rafts. *Nat. Rev. Mol. Cell Biol.* *18*,  
245 361–374.
- 246 Sharpe, H.J., Stevens, T.J., and Munro, S. (2010). A comprehensive comparison of  
247 transmembrane domains reveals organelle-specific properties. *Cell* *142*, 158–69.
- 248 Smith, C.A., Want, E.J., O’Maille, G., Abagyan, R., and Siuzdak, G. (2006). XCMS:  
249 processing mass spectrometry data for metabolite profiling using nonlinear peak alignment,  
250 matching, and identification. *Anal. Chem.* *78*, 779–787.
- 251 Thiam, A.R., Farese, R.V., and Walther, T.C. (2013). The biophysics and cell biology of lipid  
252 droplets. *Nat. Rev. Mol. Cell Biol.* *14*, 775–86.
- 253 Wächter, T., and Schroeder, M. (2010). Semi-automated ontology generation within OBO-  
254 Edit. *Bioinforma. Oxf. Engl.* *26*, i88–96.
- 255 Wassenaar, T.A., Ingólfsson, H.I., Böckmann, R.A., Tieleman, D.P., and Marrink, S.J.  
256 (2015). Computational lipidomics with insane: A versatile tool for generating custom  
257 membranes for molecular simulations. *J. Chem. Theory Comput.* *11*, 2144–2155.
- 258 Xia, J., Sinelnikov, I.V., Han, B., and Wishart, D.S. (2015). MetaboAnalyst 3.0—making  
259 metabolomics more meaningful. *Nucleic Acids Res.* *43*, W251–7.
- 260 Yang, X., Sheng, W., Sun, G.Y., and Lee, J.C.M. (2011). Effects of fatty acid unsaturation  
261 numbers on membrane fluidity and  $\alpha$ -secretase-dependent amyloid precursor protein  
262 processing. *Neurochem. Int.* *58*, 321–9.

264 **FIGURE LEGENDS**

1  
2  
3 265 **Figure 1. Enrichment analysis approaches supported by LION/web.** A lipidomics dataset  
4  
5 266 containing lipid identifiers and abundances derived from two or more conditions (1) can be  
6  
7 267 processed in two ways by LION/web. In the ‘by target list’-mode (left, 2), a subset of lipids  
8  
9 268 (*e.g.*, derived from thresholding or clustering) is compared to the total set of lipids. After  
10  
11 269 standardization of lipid nomenclature (3), applicable LION-terms are associated and assessed  
12  
13 270 for enrichment in the subset by Fisher’s exact statistics. Alternatively, in the ‘by ranking’-  
14  
15 271 mode, input lipids are ranked by the provided values (‘local’ statistics). By default, *P* values  
16  
17 272 from one-tailed t-tests are used (2). After ranking, lipid nomenclature is standardized (3).  
18  
19 273 Applicable LION-terms are subsequently associated to the dataset and distributions are  
20  
21 274 compared to a uniform distribution by ‘global’ statistics (here, Kolmogorov–Smirnov tests).  
22  
23 275 Calculated *P* values of LION-terms from both approaches are corrected for multiple testing  
24  
25 276 (Benjamini-Hochberg).  
26  
27  
28  
29  
30  
31  
32

33  
34 278 **Figure 2. LION-term enrichment and membrane fluidity of CHO-k1 cells.** CHO-k1 cells  
35  
36 279 were incubated overnight with PA, LA or AA (100  $\mu$ M, complexed to BSA) (A) or with AA  
37  
38 280 (250  $\mu$ M, complexed to BSA) (B-D). All incubations were performed in triplicate. For control  
39  
40 281 incubations, cells were incubated with fatty-acid free BSA. (A,D) After extraction and  
41  
42 282 lipidomics profiling by LC-MS/MS, enrichment analyses of the conditions of interest versus  
43  
44 283 control incubations were performed by LION/web of (A) LION-terms indicating the presence  
45  
46 284 of selected fatty acids or (D) LION-terms indicating the degree of membrane fluidity. Dot  
47  
48 285 sizes in the dot plots are scaled to the number of associated lipids; colors are scaled to the  
49  
50 286 level of enrichment. (B,C) After incubation, fluorescence emission spectra between 370 and  
51  
52 287 500 nm of lysates containing pyrenedecanoic acid (PDA) were measured in triplicate (B).  
53  
54 288 Fluorescence spectra examples of either control (black) or AA-stimulated lysates (red). Gray  
55  
56 289 shades indicate monomer and excimer fluorescence filters. (C) Mean ratios (bar) and  
57  
58  
59  
60  
61  
62  
63  
64  
65

1  
2  
3  
4  
5  
6  
7  
8  
9  
10  
11  
12  
13  
14  
15  
16  
17  
18  
19  
20  
21  
22  
23  
24  
25  
26  
27  
28  
29  
30  
31  
32  
33  
34  
35  
36  
37  
38  
39  
40  
41  
42  
43  
44  
45  
46  
47  
48  
49  
50  
51  
52  
53  
54  
55  
56  
57  
58  
59  
60  
61  
62  
63  
64  
65

290 individual datapoints (dots) of excimer over monomer fluorescence (representative data of  
291 three independent experiments). Statistical significance was determined by Student's two-  
292 tailed t-test. (A,C,D) \*  $P < 0.05$ , \*\*  $P < 0.01$ , \*\*\*  $P < 0.001$ .

## 293 **Methods**

294 **Creation of lipid ontology (LION).** We built an ontology database that connects over 50,000  
295 lipid species to the following four major branches: 'lipid classification', 'function', 'cellular  
296 localization' and 'physical or chemical properties'. For readability, a term is included at the  
297 top of each branch to indicate the nature of a LION-branch. These 'category' terms are  
298 distinguished from other LION-terms with an ID containing the prefix 'CAT'.

299 The classification system is based on the LIPIDMAPS classification (Fahy et al., 2009).

300 Downstream, we added an extra level between classes and species to enable mapping of lipid  
301 identifiers that lack detailed structural information. This concept is also used in the Swiss  
302 Lipids system (Aimo et al., 2015). The branch 'function' comprises three subcategories: 'lipid  
303 component' (associated with lipids that are primary regarded as structural component of lipid  
304 bilayers), 'lipid-mediated signaling' (lipids that have been implicated in signaling) and 'lipid-  
305 storage' (lipids that are associated with storage, primarily in lipid droplets). In the category  
306 'cellular localization', lipid classes that are enriched in particular cellular organelles are  
307 linked to their corresponding organelle terms (Holthuis and Menon, 2014; van Meer et al.,  
308 2008). The branch 'physical or chemical properties' comprises a number of subcategories.

309 First, a number of chemical descriptions ('contains fatty acid', 'fatty acid unsaturation', 'fatty  
310 acid length' and 'type by bond') was inferred from the species names. Second, data about  
311 'intrinsic curvature' (de Kroon et al., 2013; Thiam et al., 2013) were categorized into either  
312 negative, neutral or positive curvature. As data on species-level are limited, curvature was  
313 assumed to be predominantly headgroup-dependent and fatty acid composition was neglected.  
314 The third subcategory, 'charge headgroup', was divided into three groups based on structural  
315 data: 'negative', 'positive/zwitter-ion' and 'neutral' (Fahy et al., 2009). This last term

1  
2  
3  
4  
5  
6  
7  
8  
9  
10  
11  
12  
13  
14  
15  
16  
17  
18  
19  
20  
21  
22  
23  
24  
25  
26  
27  
28  
29  
30  
31  
32  
33  
34  
35  
36  
37  
38  
39  
40  
41  
42  
43  
44  
45  
46  
47  
48  
49  
50  
51  
52  
53  
54  
55  
56  
57  
58  
59  
60  
61  
62  
63  
64  
65

316 comprises also lipids lacking a headgroup. The fourth subcategory in 'physical or chemical  
317 properties' is 'chain-melting transition temperature'. This property is derived from a number of  
318 sources, comprehensively reviewed by Marsh ([Marsh, 2010](#)). This dataset covers a range of  
319 lipid classes in both glycerophospholipids (PC, PE, PG, PA, PS) and sphingolipids (SM). We  
320 made use of multiple regression analysis with lipid class, fatty acid length and unsaturation as  
321 predictors to facilitate data extrapolation to previously unreported lipid species. The obtained  
322 model was validated by leave-one-out cross-validation (LOOCV). Briefly, one datapoint from  
323 the dataset was taken out, after which the model was rebuilt with the remaining points as  
324 training set. Subsequently, the selected datapoint was used as validation sample. This  
325 procedure was repeated for all the datapoints (**Fig. S2 C**). Next, values predicted by the  
326 obtained model of all applicable lipid species present in LION were divided into quintiles  
327 with limits based on four reported lipidomics datasets ([Andreyev et al., 2010](#); [Haraszti et al.,](#)  
328 [2016](#); [Köberlin et al., 2015](#); [Lin et al., 2017](#)) and categorized into five representative classes:  
329 'very low', 'low', 'average', 'high' or 'very high' chain-melting transition temperature (a flow-  
330 chart of this procedure is depicted in **Fig. S2 E**).

331 In addition to these experimental data sets, we also used data ([Wassenaar et al., 2015](#)) that  
332 was obtained by coarse grain molecular dynamics simulation (MARTINI force-field ([Marrink](#)  
333 [et al., 2004](#))) and which includes membrane properties 'bilayer thickness' and 'lateral  
334 diffusion'. The dataset contains lipids from five common classes of glycerophospholipids  
335 (PC, PS, PG, PA, PE), but lacks sphingolipids and sterols. By definition, coarse-grained lipids  
336 represent a range of structures. To be able to use the dataset in the ontology system, names of  
337 coarse-grained lipids were translated into their representing counterparts. Subsequently, lipid  
338 properties were extrapolated to the entire database by multiple regression analysis models  
339 (with lipid class, fatty acid length and unsaturation as predictors) and validated by LOOCV  
340 (**Fig. S2 A-B**). We followed the same procedure as used for transition temperatures;  
341 extrapolated results for both properties were divided into quintiles (based on values of  
342 reported datasets ([Andreyev et al., 2010](#); [Haraszti et al., 2016](#); [Köberlin et al., 2015](#); [Lin et al.,](#)  
343 [2017](#)), predicted by our models) and categorized into five representative classes: 'very low',



344 'low', 'average', 'high' or 'very high'.

345 The initial structure of LION was build with OBOEdit v.2.3.1 (Wächter and Schroeder, 2010)

346 and formatted as OBO-file. Subsequently, custom R-scripts connected specific terms with

347 more general terms based on the described datasets. The entire ontology can be found as **File**

348 **S1**. In addition, a table containing all LION-terms with corresponding LION-identifier is

349 provided in **Data S5**.

350 **Implementation of enrichment analysis tool.** To use LION with existing ontology

351 enrichment tools, we used an adapted and generalized version of Bioconductor R-package

352 'topGO' (Alexa and Rahnenfuhrer, 2017). This version, called 'topOnto', allows users to

353 include ontologies other than those provided with the package. TopOnto's attached Perl-script

354 was used to convert the ontology file from OBO- to SQLite-format. Apart from this extra

355 feature, the 'topOnto' package provides the same functionality as the original version. To

356 perform the enrichment analysis with 'topOnto', two statistical approaches were used. In the

357 'by target-list mode', Fisher-exact statistics are used to indicate enrichment. In the 'by

358 ranking' mode, Kolmogorov-Smirnov tests are used as 'global' statistics. In both approaches,

359 topGO's classic algorithm was selected. After LION enrichment analysis, raw *P* values were

360 corrected for multiple testing (Benjamini-Hochberg). The R-scripts were used to build the

361 user-friendly web-based tool LION/web (**Note S1**) with R-package 'shiny'. The application

362 has been made available on the shinyapps.io server as a free online tool, accessible through

363 <http://www.lipidontology.com/>.

364 **Cell culture and preparation of fatty acid-albumin complexes.** CHO-k1 cells were

365 cultured in Ham's F-12 medium (Thermo Fisher Scientific, Waltham, MA, USA)

366 supplemented with 7.5% FBS (Thermo Fisher Scientific, Waltham, MA, USA), 100 units/ml

367 penicillin and 100 µg/ml streptomycin (Thermo Fisher Scientific, Waltham, MA, USA). Cells

368 were grown in a humidified incubator at 37°C containing 5% CO<sub>2</sub> and passaged twice a week.

369 Stocks of 10 mM arachidonic acid, linoleic acid, oleic acid, or palmitic acid (all obtained

370 from Sigma, St. Louis, MO, USA) were complexed to 2 mM fatty-acid free BSA (Sigma, St.

1  
2  
3  
4  
5  
6  
7  
8  
9  
10  
11  
12  
13  
14  
15  
16  
17  
18  
19  
20  
21  
22  
23  
24  
25  
26  
27  
28  
29  
30  
31  
32  
33  
34  
35  
36  
37  
38  
39  
40  
41  
42  
43  
44  
45  
46  
47  
48  
49  
50  
51  
52  
53  
54  
55  
56  
57  
58  
59  
60  
61  
62  
63  
64  
65

371 Louis, MO, USA), filter-sterilized and stored at  $-20^{\circ}\text{C}$ . All experimental incubations were  
372 performed in plastic 6-well culture dishes (Corning, Tewksbury, MA, USA).

373

374 **Measuring membrane fluidity.** After overnight incubation in the absence or presence of  
375 fatty-acids (using fatty acid-free BSA or fatty acids coupled to BSA, respectively), cells were  
376 washed and scraped in PBS. Cells were subsequently homogenized on ice with 26-gauge  
377 needles (BD Bioscience, San Jose, CA, USA). Homogenates or blanks were mixed with  
378 pyrenedecanoic acid (PDA) in the manufacturer's supplied dilution buffer (Membrane fluidity  
379 kit, Abcam, Cambridge, UK) and transferred into a 96-well plate (black plastic with glass  
380 bottom, Greiner Bio-One, Frickenhausen, Germany). After 30 minutes of incubation at  $37^{\circ}\text{C}$ ,  
381 fluorescence spectra (excitation at 360nm, emission between 375-500 nm,  $37^{\circ}\text{C}$ ) were  
382 measured with a temperature-controlled fluorescence microplate reader (CLARIOstar, BMG  
383 Labtech, Offenburg, Germany). Data were processed in R by expressing monomer (370-390  
384 nm) and excimer (470-490 nm) mean fluorescence after blank-subtraction as ratios. Data were  
385 expressed as means. Differences were analyzed by two-tailed Student's t-tests. *P* values <  
386 0.05 were considered significant.

387 **Lipidomics by LC-MS/MS.** After incubation, lipids were extracted as described before  
388 (Bligh and Dyer, 1959). Subsequently, lipid extracts were dried under nitrogen and dissolved  
389 in 100  $\mu\text{L}$  chloroform/methanol (1:1) and injected (10  $\mu\text{L}$ ) on a hydrophilic interaction liquid  
390 chromatography (HILIC) column (2.6  $\mu\text{m}$  HILIC 100  $\text{\AA}$ , 50 x 4.6 mm, Phenomenex,  
391 Torrance, CA), eluted by an eluens gradient (flow rate of 1 mL/min) from ACN/acetone (9:1,  
392 v/v) to ACN/H<sub>2</sub>O (7:3, v/v) with 10mM ammonium formate, both containing 0.1% formic  
393 acid. The column effluent was connected to a heated electrospray ionization (hESI) source of  
394 a mass spectrometer (Fusion, Thermo Scientific, Waltham, MA). The measurements were  
395 performed with an orbitrap resolution of 120.000, generating 30 data-dependent MS/MS  
396 spectra per second in the linear ion trap.

1  
2  
3  
4  
5  
6  
7  
8  
9  
10  
11  
12  
13  
14  
15  
16  
17  
18  
19  
20  
21  
22  
23  
24  
25  
26  
27  
28  
29  
30  
31  
32  
33  
34  
35  
36  
37  
38  
39  
40  
41  
42  
43  
44  
45  
46  
47  
48  
49  
50  
51  
52  
53  
54  
55  
56  
57  
58  
59  
60  
61  
62  
63  
64  
65

397 **Lipidomics data analysis.** Acquired raw datafiles were converted to mzXML-files by  
398 msConvert (part of ProteoWizard v3.0.913) (Adusumilli & Mallick, 2017) and processed with  
399 R-package ‘xcms’ v2.99.3 (Smith et al., 2006). After deisotoping, annotation of lipids was  
400 performed by matching measured MS-1 m/z values with theoretical m/z values. Lipids with  
401 the same or similar m/z values - e.g., BMP(38:4) and PG(38:4) - could be distinguished by  
402 differences in retention time (Fig. S4 and S5). Lipid annotation containing individual fatty  
403 acids as used in Fig. 2 A and Fig. S4 was accomplished by examining MS-2 spectra. When  
404 MS-2 spectra were available for a given MS-1 peak, the most abundant fatty acid combination  
405 was used to annotate the lipid. The resulting experimental datasets, as well as the public RAW  
406 264.7 macrophage dataset (Andreyev et al., 2010), were normalized by expressing all lipids as  
407 ratios of the sum of all intensities per sample. MetaboAnalyst 3.0 (Xia et al., 2015) was used  
408 to replace missing values (of the RAW 264.7 dataset) by half of the minimum positive value  
409 in the original data, and to perform Principal Component Analysis (with Pareto scaling).

410 **Software and R-packages.** All R-scripts were run with RStudio v1.0.153 (R v3.4.4) with the  
411 following packages: ‘shiny v1.1.1’, ‘visNetwork v2.0.1’, ‘data.table v1.10.4-2’, ‘GMD  
412 v0.3.3’, ‘igraph v1.0.1’, ‘reshape2 v1.4.2’, ‘ggplot2 v2.2.1’, ‘ggthemes v3.4.0’, ‘shinyTree  
413 v0.2.2’, ‘shinyWidgets v0.4.1’, ‘shinythemes v1.1.1’, ‘RSQLite v2.1.1’, ‘topOnto v0.99.0’  
414 and ‘xcms v2.99.3’ (Smith et al., 2006). Perl-scripts provided with the topOnto package were  
415 run with Perl v5.26.0. All figures were built in R and processed in Cytoscape v3.5.1 or  
416 Inkscape v0.92.2.

417 **Data and code availability.** The LION database (OBO-format) and raw lipidomics data are  
418 available as Supplementary Data. The public RAW 264.7 macrophages dataset (Andreyev et  
419 al., 2010) is available on the journal’s website  
420 (<http://www.jlr.org/content/suppl/2010/06/23/jlr.M008748.DC1/jlr.M008748-1.xls>). R-  
421 package ‘topOnto’ is available at <https://github.com/hxin/topOnto>, the associated R-package  
422 containing the LION database in topOnto-friendly format at  
423 <https://github.com/martijnmolenaar/topOnto.LION2.db>.

1  
2  
3  
4  
5  
6  
7  
8  
9  
10  
11  
12  
13  
14  
15  
16  
17  
18  
19  
20  
21  
22  
23  
24  
25  
26  
27  
28  
29  
30  
31  
32  
33  
34  
35  
36  
37  
38  
39  
40  
41  
42  
43  
44  
45  
46  
47  
48  
49  
50  
51  
52  
53  
54  
55  
56  
57  
58  
59  
60  
61  
62  
63  
64  
65

424 The source code of the web-tool is available via github; Project name: LION-web; Project  
425 home page: <https://github.com/martijnmolenaar/LION-web/> ; Operating system(s): platform  
426 independent; Programming language: R ; License: GNU General Public License v3.0  
427  
428

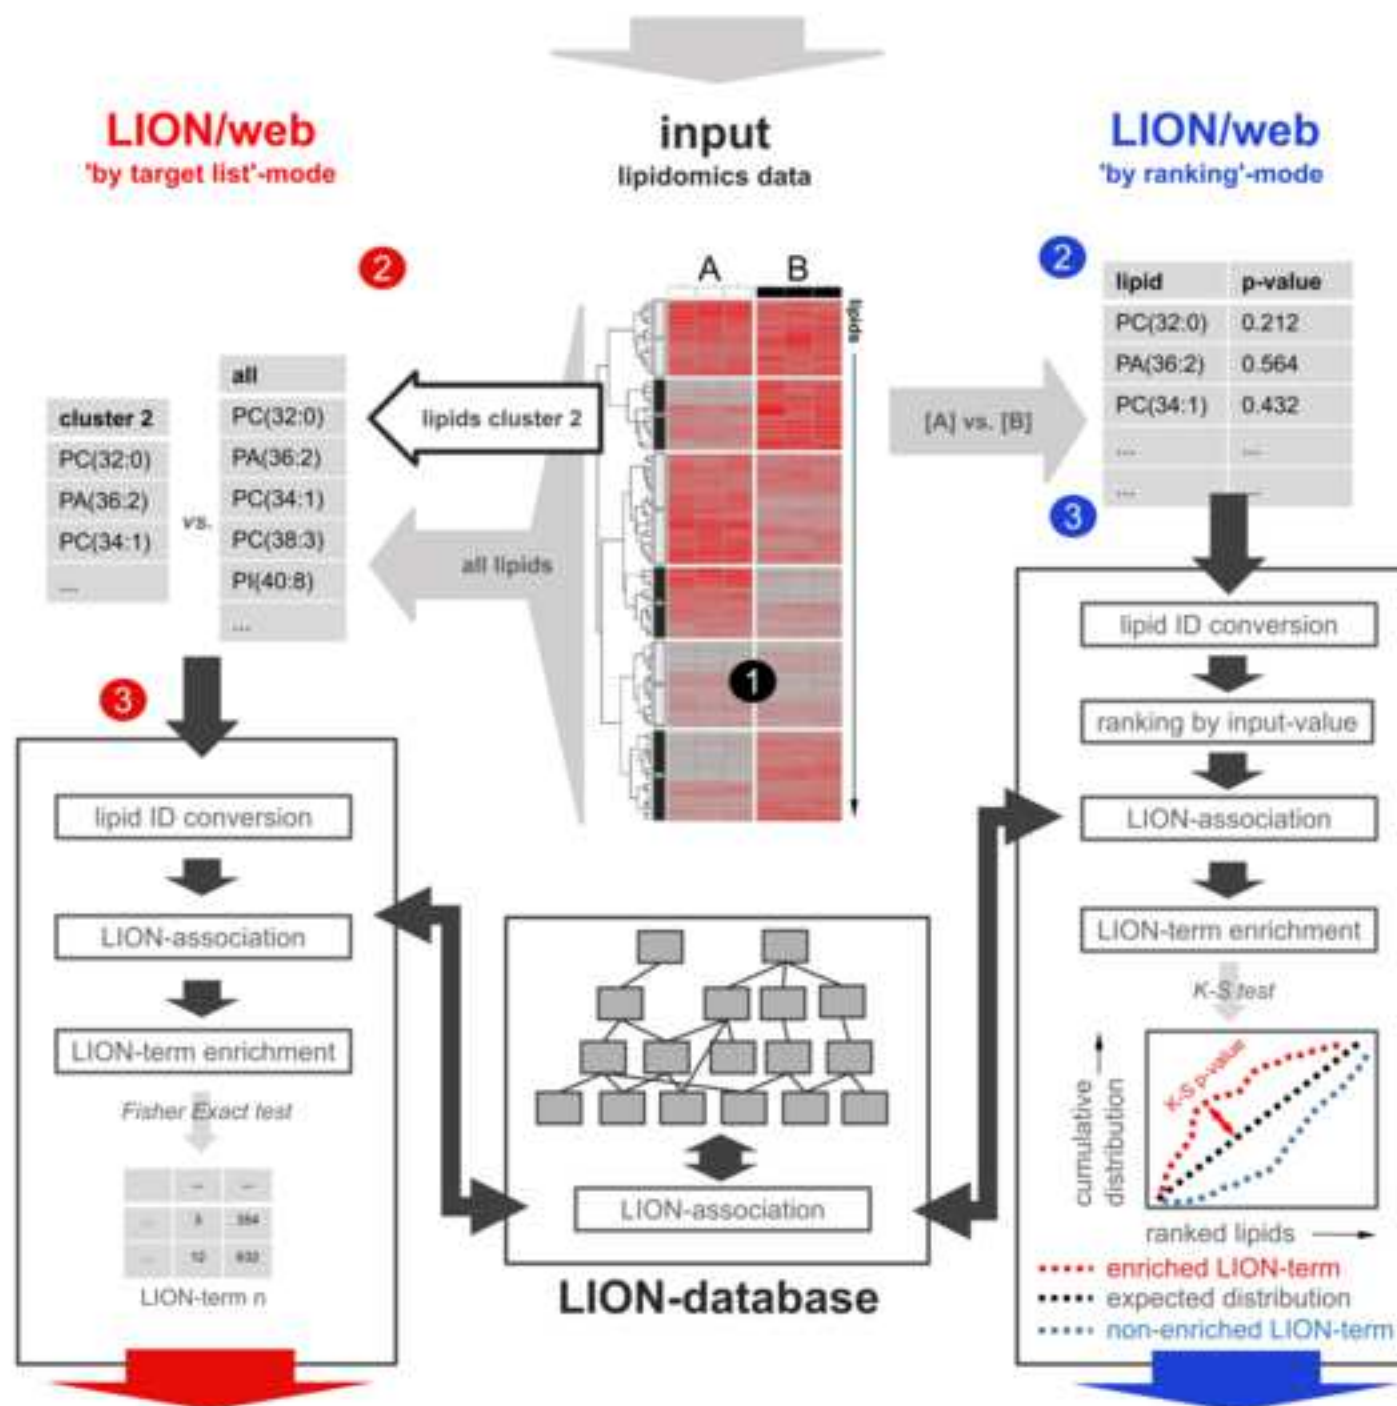

**A**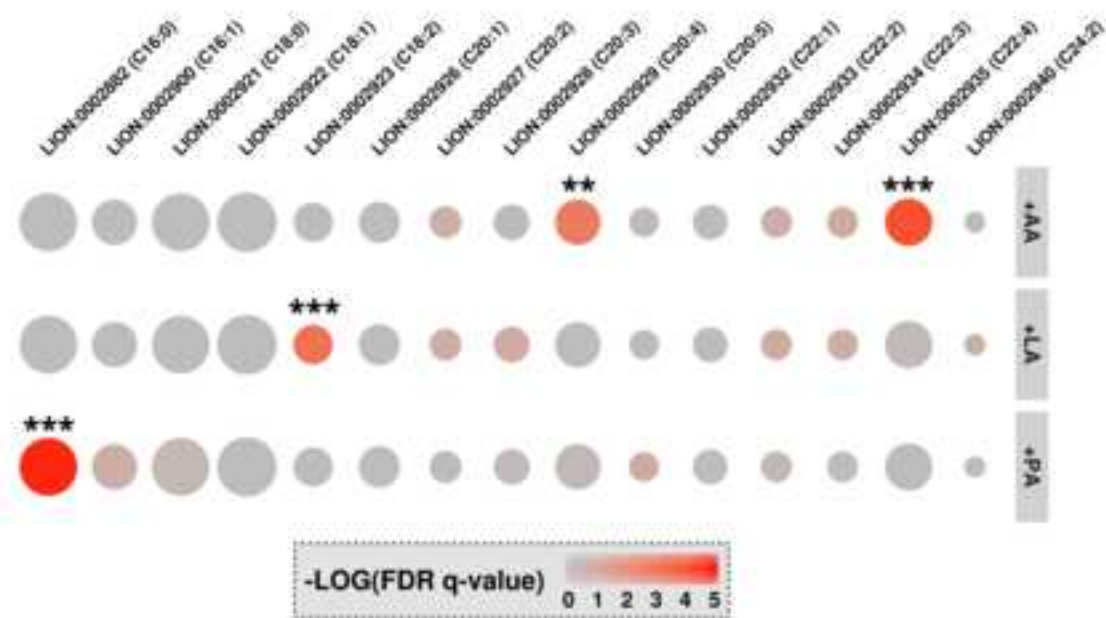**B**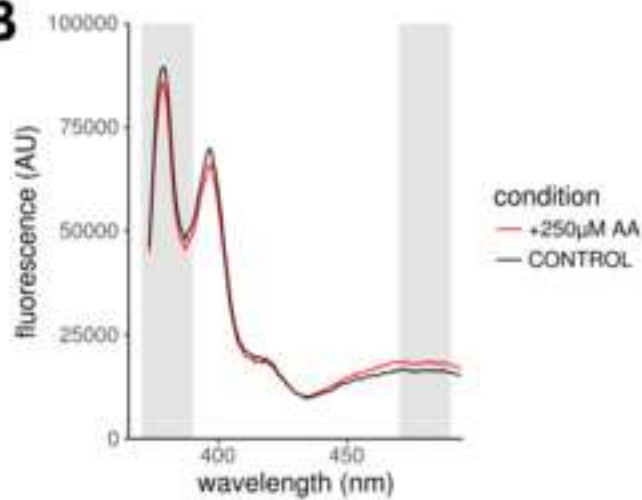**C**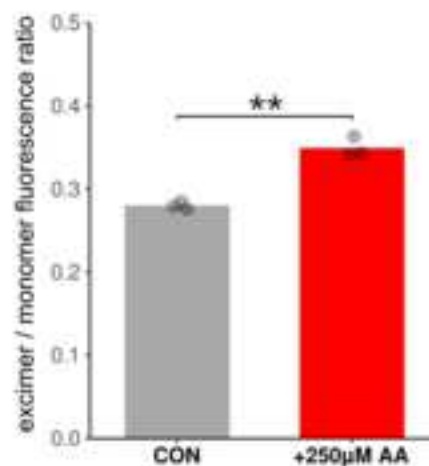**D**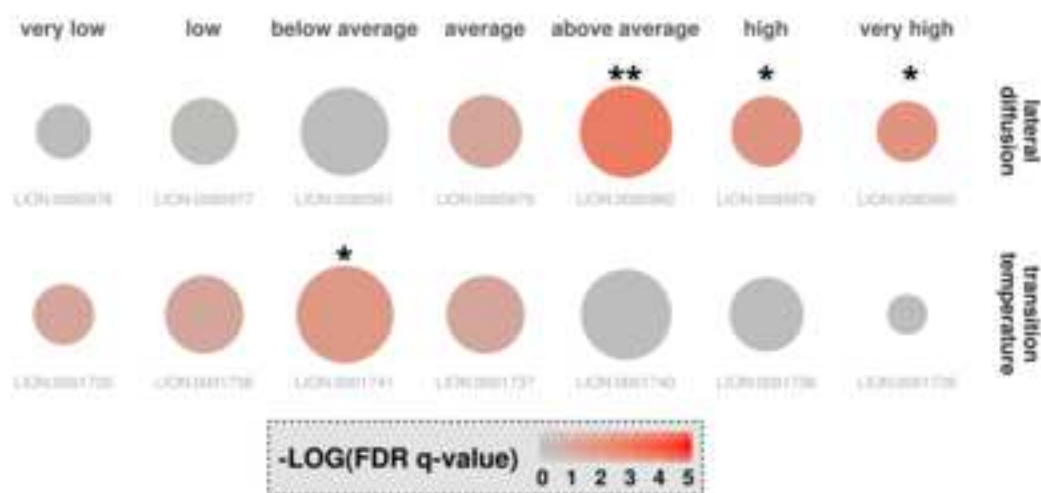



Click here to access/download  
**Supplementary Material**  
Figure S1.png



Click here to access/download  
**Supplementary Material**  
Figure S2.png





Click here to access/download  
**Supplementary Material**  
Figure S3.png



Click here to access/download  
**Supplementary Material**  
Figure S4.png



Click here to access/download  
**Supplementary Material**  
Figure S5.png



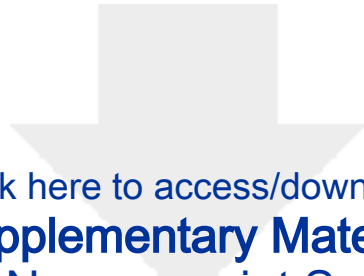

[Click here to access/download](#)

**Supplementary Material**

20180912 LION-manuscript Supplement.docx

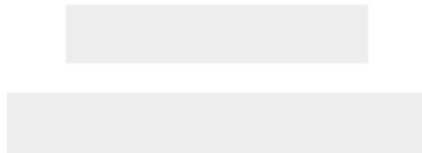

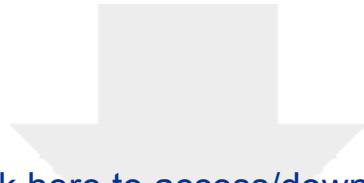

Click here to access/download  
**Supplementary Material**  
Supplemental Data 1.csv



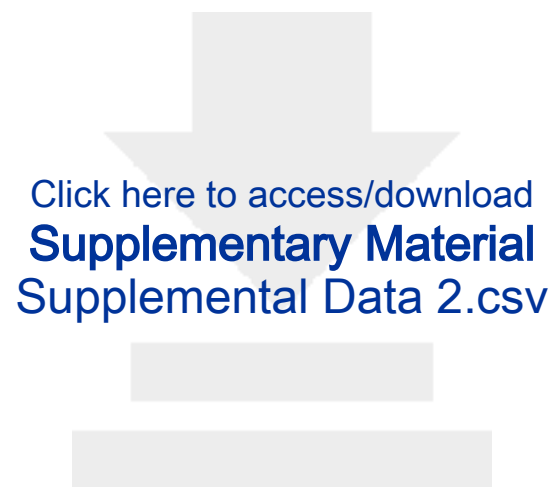

Click here to access/download  
**Supplementary Material**  
Supplemental Data 2.csv

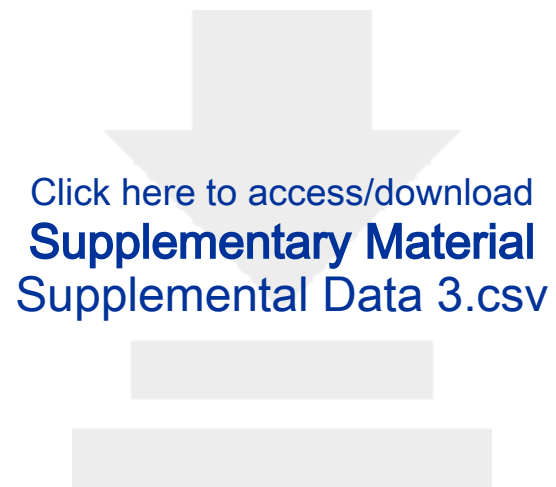

Click here to access/download  
**Supplementary Material**  
Supplemental Data 3.csv

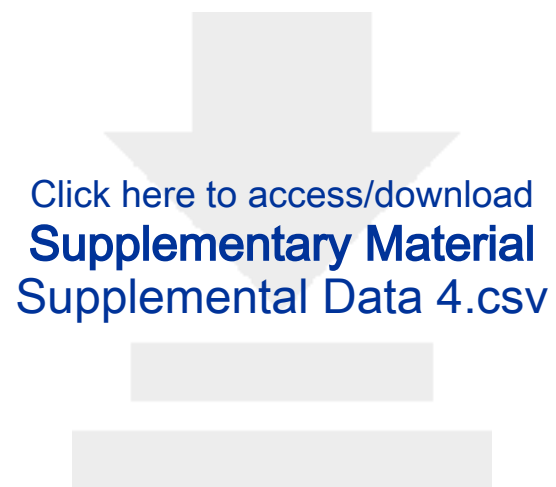

Click here to access/download  
**Supplementary Material**  
Supplemental Data 4.csv



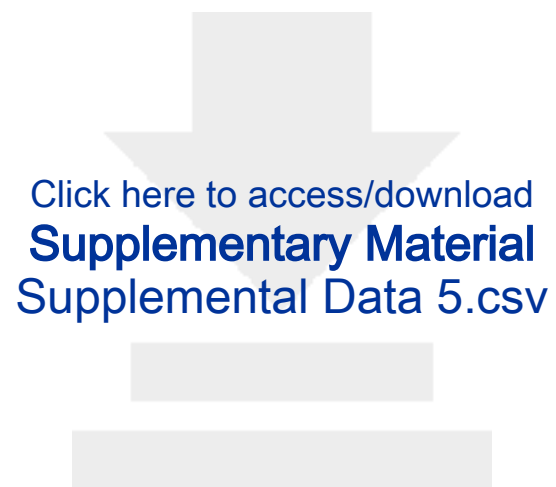

Click here to access/download  
**Supplementary Material**  
Supplemental Data 5.csv



Click here to access/download  
**Supplementary Material**  
Supplemental Data 6.csv

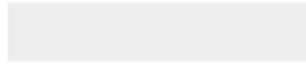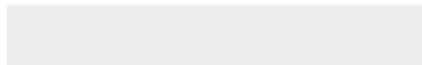

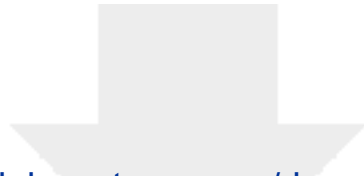

Click here to access/download  
**Supplementary Material**  
Supplemental File 1 LION.obo

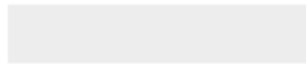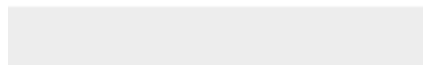



Click here to access/download  
**Supplementary Material**  
example set.xls



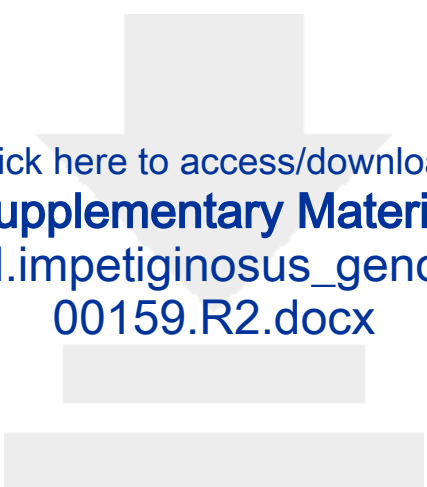

Click here to access/download

**Supplementary Material**

lipidomics set - adapted from Andreyev AY et al  
2010.csv

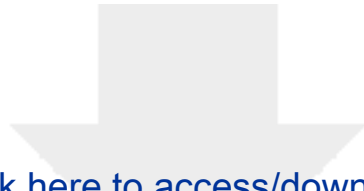

[Click here to access/download](#)

**Supplementary Material**

lipidomics set - adapted from Kyle et al 2018.csv

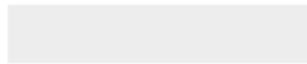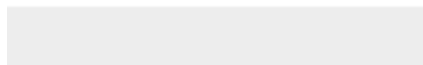

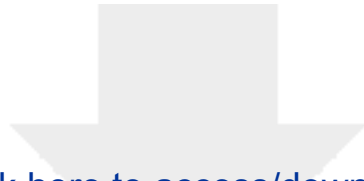

[Click here to access/download](#)

**Supplementary Material**

lipidomics set - adapted from Melero A et al 2018.csv



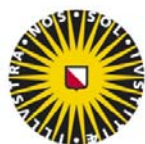**Universiteit Utrecht***GigaScience***The Editor****Dr. Scott Edmunds**

Faculty of Veterinary Medicine  
Department of Biochemistry  
and Cell Biology  
PO Box 80176  
3508 TD Utrecht  
The Netherlands  
Tel: +31-30-2535375  
Fax: +31-30-2535492  
Email: j.b.helms@uu.nl

September 14, 2018

Dear Dr. Edmunds,

In response to your positive decision on our pre-submission enquiry (august 29, 2018), we would like to submit our manuscript entitled ‘LION/web: a web-based ontology enrichment tool for lipidomic data analysis’ by Martijn Molenaar *et al.* to be considered for publication in *GigaScience*.

In our manuscript (‘Technical Note’ format), we describe a novel database called Lipid Ontology (LION) that enables researchers to associate lipids (lipid classes, fatty acid associations, headgroup charge) with biological relevant properties (e.g. intrinsic curvature, effect on membrane fluidity). So far it is not possible to link chemical, biophysical and biological relevant properties to individual lipids in a systematic way and to apply this knowledge on whole lipidomes by performing statistical analyses. LION also enabled us to create a web-based application (LION/web) that calculates the enrichment of LION-terms in user-provided lipidomic datasets. In the manuscript, we illustrate this with a number of examples. The application is freely accessible via the browser ([www.lipidontology.com](http://www.lipidontology.com)) and can be used without knowledge of programming languages. We also posted our manuscript as preprint on bioRxiv (<https://doi.org/10.1101/398040>). The manuscript is not under consideration elsewhere. In addition, all authors have approved the manuscript for this submission.



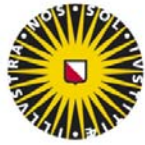

We strongly believe that LION and LION/web is of interest to an increasing scientific community as it has the potential to greatly enhance lipidomic interpretations and to gain a better understanding of membrane biology. The number of PubMed articles in 2016 containing the keyword 'lipidomics' grew twice as fast as literature with the keywords 'proteomics' or 'genomics'. This is even more surprising considering the fact that while the last two disciplines have a number of bioinformatic tools to support biological interpretation of its large datasets, this is not yet available for lipidomics. We expect this number to increase even more dramatically when LION/web becomes available.

*GigaScience* would be an excellent podium for our manuscript and web-tool. We were attracted by the journal's mission to boost open-science and to the opportunities to publish data resources and methods. To streamline the reviewing process, we provide extra testing datasets from other research groups along with this submission (in addition to the examples that are available via the web-tool).

We would like to suggest the following experts on lipidomic technologies as reviewers;

Howard Riezman, University of Geneva ([Howard.Riezman@unige.ch](mailto:Howard.Riezman@unige.ch)),

Markus Wenk, National University of Singapore ([bchmrw@nus.edu.sg](mailto:bchmrw@nus.edu.sg)),

Britta Brügger, Heidelberg University ([britta.bruegger@bzh.uni-heidelberg.de](mailto:britta.bruegger@bzh.uni-heidelberg.de)).

Edward Dennis, UCSD, United States ([edennis@ucsd.edu](mailto:edennis@ucsd.edu))

Thank you in advance for your consideration and handling of the manuscript.

With kind regards,

Prof. Dr. J.B. Helms
