# Supplementary material for: LION/web: a web-based ontology enrichment tool for lipidomic data analysis
Source: PubMed Central journal article supplement (PMC6541037; doi:10.1093/gigascience/giz061), 2019-05-29
Supplement: giz061_giga-d-18-00357_revision_1.pdf [file giz061_giga-d-18-00357_revision_1.pdf]

|                                                      |                                                                                                                                                                                                                                                                                                                                                                                                                                                                                                                                                                                                                                                                                                                                                                                                                                                                                                                                                                                                                                                                                                                                                                                                                                                                                                                                                                                                                                                                                                                                                                 |
|------------------------------------------------------|-----------------------------------------------------------------------------------------------------------------------------------------------------------------------------------------------------------------------------------------------------------------------------------------------------------------------------------------------------------------------------------------------------------------------------------------------------------------------------------------------------------------------------------------------------------------------------------------------------------------------------------------------------------------------------------------------------------------------------------------------------------------------------------------------------------------------------------------------------------------------------------------------------------------------------------------------------------------------------------------------------------------------------------------------------------------------------------------------------------------------------------------------------------------------------------------------------------------------------------------------------------------------------------------------------------------------------------------------------------------------------------------------------------------------------------------------------------------------------------------------------------------------------------------------------------------|
| <b>Manuscript Number:</b>                            | GIGA-D-18-00357R1                                                                                                                                                                                                                                                                                                                                                                                                                                                                                                                                                                                                                                                                                                                                                                                                                                                                                                                                                                                                                                                                                                                                                                                                                                                                                                                                                                                                                                                                                                                                               |
| <b>Full Title:</b>                                   | LION/web: a web-based ontology enrichment tool for lipidomic data analysis                                                                                                                                                                                                                                                                                                                                                                                                                                                                                                                                                                                                                                                                                                                                                                                                                                                                                                                                                                                                                                                                                                                                                                                                                                                                                                                                                                                                                                                                                      |
| <b>Article Type:</b>                                 | Technical Note                                                                                                                                                                                                                                                                                                                                                                                                                                                                                                                                                                                                                                                                                                                                                                                                                                                                                                                                                                                                                                                                                                                                                                                                                                                                                                                                                                                                                                                                                                                                                  |
| <b>Funding Information:</b>                          |                                                                                                                                                                                                                                                                                                                                                                                                                                                                                                                                                                                                                                                                                                                                                                                                                                                                                                                                                                                                                                                                                                                                                                                                                                                                                                                                                                                                                                                                                                                                                                 |
| <b>Abstract:</b>                                     | <p>A major challenge for lipidomic analyses is the handling of the large amounts of data and the translation of results to interpret the involvement of lipids in biological systems. We built a new lipid ontology (LION) that associates over 50,000 lipid species to biophysical, chemical and cell biological features. By making use of enrichment algorithms, we used LION to develop a web-based interface (LION/web, <a href="http://www.lipidontology.com">www.lipidontology.com</a>) that allows identification of lipid-associated terms in lipidomes. LION/web was validated by analyzing a lipidomic dataset derived from well-characterized sub-cellular fractions of RAW 264.7 macrophages. Comparison of isolated plasma membranes with the microsomal fraction showed a significant enrichment of relevant LION-terms including 'plasma membrane', 'headgroup with negative charge', 'glycerophosphoserines', 'above average bilayer thickness', and 'below average lateral diffusion'. A second validation was performed by analyzing the membrane fluidity of CHO cells incubated with arachidonic acid. An increase in membrane fluidity was observed both experimentally by using pyrene decanoic acid and by using LION/web, showing significant enrichment of terms associated with high membrane fluidity ('above average', 'very high' and 'high lateral diffusion', and 'below average transition temperature'). The results demonstrate the functionality of LION/web, which is freely accessible in a platform-independent way.</p> |
| <b>Corresponding Author:</b>                         | <p>Bernd Helms</p> <p>NETHERLANDS</p>                                                                                                                                                                                                                                                                                                                                                                                                                                                                                                                                                                                                                                                                                                                                                                                                                                                                                                                                                                                                                                                                                                                                                                                                                                                                                                                                                                                                                                                                                                                           |
| <b>Corresponding Author Secondary Information:</b>   |                                                                                                                                                                                                                                                                                                                                                                                                                                                                                                                                                                                                                                                                                                                                                                                                                                                                                                                                                                                                                                                                                                                                                                                                                                                                                                                                                                                                                                                                                                                                                                 |
| <b>Corresponding Author's Institution:</b>           |                                                                                                                                                                                                                                                                                                                                                                                                                                                                                                                                                                                                                                                                                                                                                                                                                                                                                                                                                                                                                                                                                                                                                                                                                                                                                                                                                                                                                                                                                                                                                                 |
| <b>Corresponding Author's Secondary Institution:</b> |                                                                                                                                                                                                                                                                                                                                                                                                                                                                                                                                                                                                                                                                                                                                                                                                                                                                                                                                                                                                                                                                                                                                                                                                                                                                                                                                                                                                                                                                                                                                                                 |
| <b>First Author:</b>                                 | Martijn R. Molenaar                                                                                                                                                                                                                                                                                                                                                                                                                                                                                                                                                                                                                                                                                                                                                                                                                                                                                                                                                                                                                                                                                                                                                                                                                                                                                                                                                                                                                                                                                                                                             |
| <b>First Author Secondary Information:</b>           |                                                                                                                                                                                                                                                                                                                                                                                                                                                                                                                                                                                                                                                                                                                                                                                                                                                                                                                                                                                                                                                                                                                                                                                                                                                                                                                                                                                                                                                                                                                                                                 |
| <b>Order of Authors:</b>                             | <p>Martijn R. Molenaar</p> <p>Aike Jeucken</p> <p>Tsjerk A. Wassenaar</p> <p>Chris H. A. van de Lest</p> <p>Jos F. Brouwers</p> <p>Bernd Helms</p>                                                                                                                                                                                                                                                                                                                                                                                                                                                                                                                                                                                                                                                                                                                                                                                                                                                                                                                                                                                                                                                                                                                                                                                                                                                                                                                                                                                                              |
| <b>Order of Authors Secondary Information:</b>       |                                                                                                                                                                                                                                                                                                                                                                                                                                                                                                                                                                                                                                                                                                                                                                                                                                                                                                                                                                                                                                                                                                                                                                                                                                                                                                                                                                                                                                                                                                                                                                 |
| <b>Response to Reviewers:</b>                        | <p>For a formatted version with answers to the comments in blue, please see uploaded document 'Response to reviewers'</p> <p>Ruth Welti (Reviewer 1)</p> <p>LION provides useful information helping users associate lipidomics data on membrane lipid species from mammalian systems with the chemical and physical properties of those systems. Overall this is an ambitious undertaking that is likely to provide insights on lipid properties, particularly to users that are not familiar with</p>                                                                                                                                                                                                                                                                                                                                                                                                                                                                                                                                                                                                                                                                                                                                                                                                                                                                                                                                                                                                                                                         |

chemical or physical properties of membrane lipids. Overall, the tool seems useful and the paper is well-written, but a few points could be explained in more detail.

We appreciate the positive and constructive comments of the reviewer.

#1. It should be mentioned, and perhaps the authors could include an explanatory note at the site, noting that actual physical properties of membranes (such as fluidity) depend on factors in addition to the typically measured lipids, including sterols and protein type and content.

We incorporated a statement about this aspect at three different locations: i) in the web-tool (on the '?' sign, beneath the results output); ii) in a new F.A.Q. that is now available via the website; and iii) in the Discussion (line 200-204).

#2. It might be useful to point out specifically that the samples chosen to "calibrate" the lipid categorization are all from mammalian cells and thus the ability to accurately interpret lipidomics data from other types of systems is not clear. Perhaps this is because it is not clear to the reviewer precisely how the categorized lipids (page 4, lines 69-74) were used in the analysis. Since many mammalian tissues (e.g. brain, heart) have more extreme compositions, will this be a problem for analysis?

Indeed, we made use of mammalian lipidomics datasets as reference to define the groups of three biophysical properties. To emphasize this, we included a comment on LION's focus on mammalian lipidomes in the Discussion (line 193-197). This will, however, not compromise the results in specific examples as mentioned by the reviewer as the principle of LION/Web is based on sample comparison (Fig.1, sample A and B). A comparison between tissues with more extreme compositions (e.g. brain and liver) is likely to result in enriched terms related to very low Tm's or very high lateral diffusions, and in different lipid classes/species, results that reflect the respective lipidomes. Comparison between samples from the same tissue (e.g. wt brain vs. geneX-/- brain) will often yield more subtle differences, depending on the knockout. However, LION/Web will report any significant difference, e.g. if geneX affects lipid composition. The statistical power of the significance can be further increased by increasing the number of replicates (n).

#3. The ranking approach appears to be a pairwise comparison. I.e., even when multiple samples are present, comparison is to one (control) sample. This is analogous to a typical transcriptomic approach but, given that it's actually easier to collect lipidomic data than transcriptomic data on hundreds of samples/conditions, having to analyze the data pairwise might be a bit burdensome. Maybe you could discuss the choice of approach in the paper or clarify if the reviewer's understanding is incorrect.

We thank the reviewer for this comment. We have extended the web-tool with more options to calculate local statistics (values that are used to rank lipids). One of these options is the use of p-values derived from one-way ANOVA F-tests. This statistic analysis allows comparison of multiple conditions and can be used to rank the most fluctuating lipid species in datasets. Subsequent enrichment analysis will result in LION-terms summarizing these lipids.

A second option that we included to characterize lipidomic datasets with more than 2 conditions, is the use of hierarchical clustering in combination with the target-list mode. A new figure (Figure 2B) illustrates this approach using the same public dataset that we used in the initial version of the manuscript. Enrichment analysis of the lipids in the clusters, in combination with a visual presentation of the clusters in relation to the conditions, further aids in characterization of the full dataset.

#4. An example showing the output from the target mode would be helpful to the reader.

We agree with the reviewer that the manuscript would benefit from an example of the target mode. As mentioned above (#3) we now include a new figure (Figure 2B) that shows a clustered heat map of the RAW 264.7 macrophages dataset. Each cluster is characterized by assessing LION-term enrichment of the lipids within each cluster, as compared to all the lipids in the experiment.

Aleksander Andreyev (Reviewer 2)

This technical note describes a Lipid-related ONtology database (LION) and accompanying enrichment analysis tool with potentially high value for lipidomics research. According to the authors they aim to "bridge<> the gap between lipidomics and cell biology" (p.7, l.138). A mere attempt at this herculean task is highly commendable. This entails, however, that the narration should be comprehensible for a non-expert user, presumably a cell biologist with little understanding of bioinformatics (which would be also in line with the GigaScience editorial guidelines). Unfortunately, the manuscript is plagued with multiple issues that make it very hard to understand the utility and intended use of the tools and nearly impossible to evaluate their validity. From the way manuscript is written, it feels as if it is intended more for bioinformatics audience which almost defeats the purpose. It is also somewhat disorganized with the logical flow being interrupted by off-hand remarks and description of one topic spread over different parts of the manuscript, sometimes repetitively. In a few cases, the text is burdened with statements of the obvious (e.g., "lipid structure is closely related to lipid function", "allows identification of lipid-associated terms in lipidomes"). There are multiple typos, grammar errors and misused words or terms that make a mere reading of the article a torture. One step to address this issues might be including subsections under the Findings section, another - careful reassessment of what material represents technical side and belongs to Methods and what should be in the Findings (my feeling is that a good portion of the LION description, currently under Methods, actually belongs to the Findings, right after the background information). The same goes to figure legends - I think currently they are overloaded with information that belongs in the Methods. The manuscript suffers from frequent use of vague statements. Instead of describing WHAT was done the authors simply state the means for doing it: "we used" this or that, "we made use of" this or that, such and such "was used", etc. Instead of explaining HOW something was done a bare statement "based on" is often made. References are missing (e.g., "as described in the literature", p.4, l.53, "was reported", p.5, l.99). The tally of connections between membrane biophysics and cell biology (p.3, l.35-43) looks random and lacking completeness. Besides, it seems somewhat misplaced. Authors use what appears to be in-house or jargon terms, such as "by target list", "by ranking" for the modes of the enrichment analysis, "local" statistics, etc. Use of such terms should be avoided. For such important terms as the modes of analysis the names should be related to their function and, ideally, self-explanatory (or, at least, thoroughly explained). All these issues pertaining to the quality of the narration should be addressed before the substance of the work can be properly evaluated.

We thank reviewer #2 for his thorough review report and would like to apologize for the typos and grammar errors in the manuscript that made 'reading of the article a torture'. As suggested, the Findings section is now subdivided into subsections with headings. We also include a separate Discussion section to avoid the 'interruption by off-hand remarks'.

Indeed, LION/web is intended to be useful for non-experts in bioinformatics. We recognize that some concepts used in the manuscript might be difficult to grasp with limited bioinformatics experience. Nevertheless, some basic understanding of data-analysis must be expected from users that obtained omics-data (which is obviously a prerequisite to use LION/web). In the updated version, we have provided more explanation and illustrate some of the concepts with examples in the following ways:

- i) throughout the manuscript, we added additional information.
- ii) we added a point-by-point frequently asked question (F.A.Q.) section in the web-tool, that can be accessed via the main menu of the website.
- iii) we added 'tooltips' in the LION/Web application. Tooltips are pieces of information or instructions that appear when users hover the mouse cursor over an item - without clicking on it. This allows for specific instructions for specific steps.

Upon the reviewer's request, we have considered several alternative names for the

enrichment modes (ranking and target-list mode). However, we found the initial names to be the clearest, as it describes the difference between the modes the best. The use of a target-list (usually referred to as gene list, ID list, etc.) is also common practise in gene ontology enrichment procedures (DAVID, Panther, GOrilla). Users who have experience in this field will recognize the concept 'target-list'. To improve the understanding of these terms/modes, we included more details about both modes in the Methods section. In addition, we added a new figure (Figure 2A+B) to illustrate the target-list mode.

With respect to the comment "The tally of connections between membrane biophysics and cell biology (p.3, l.35-43) looks random and lacking completeness" we note that the listing of biophysical properties related to membrane biology in the background section was not intended to be complete, but to provide a few intuitive examples. To clarify this, we put these examples in parentheses and 'e.g.'.

Concerning missing references: Details about references per data source is now available via Supplemental Data 1. The statement 'was reported' (page-5/line-99 of initial manuscript) refers to LION-terms that were reported by the web-tool.

However, even in the present state the manuscript allows to point out the following weaknesses/areas for improvement:

#1. The LION should be completely verbally described (beyond the present reference to the .obo file). This should include a list of categorical ontology terms and rules of association between them. For the ones that are not obvious, a justification should be provided. As it stands now, the terms in question are hidden inside 1275-page long Excel file among about 50,000 terms representing individual lipids. Some of them relate to conventional structural elements of lipids, others are less obvious. For example, "fatty acid with 16-18 carbons" - is there any scientific meaning in this term? What is so special about this particular chain length? What exactly are the extra levels of classification between lipid classes and species? - they are mentioned but not described.

Upon the reviewer's request, we describe LION in a better structured way by inclusion of two additional tables:

- (1) Supplemental Data 1; describing all LION-terms (excluding lipid species), with detailed information about hierarchy, classification and references.
- (2) Supplemental Data 2; describing all lipid species present in LION.

Concerning the scientific meaning of terms: one of the guiding principles of LION was to be able to construct defined subsets of lipids ('terms'). LION/web then aids to report the most interesting subsets. Some of these subsets might be of interest, others might not. Scientific meaning should be evaluated by the scientist. For example, "fatty acid with 16-18 carbons" might indeed sound trivial at the first sight. Nevertheless, its enrichment could hint towards testable biological hypotheses.

#2. The enrichment tool is the crux of the article, the thing the authors are trying to "sell". However, there is no description of what it does and how it can be used. I flatter myself to be a qualified user but I could not make a head or tail of what the so called "by target list" mode does. If my "target list" includes unsaturated lipids I'll get enrichment in "double bonds", "below average transition temperature", etc. That much is obvious without running the tool. What else? What are the scenarios when I need to use it? Why do I need two lipidomic data sets for this? What does "derived from thresholding or clustering" mean?

We recognize that in the initial version of the manuscript, the use of the 'target-list mode' was not illustrated. We added an extra figure (figure 2) that demonstrates the use of both modes using the RAW 264.7 macrophages dataset (figure 2A+B for the target-list, figure 2C for the ranking mode). Figure 2C was a supplemental figure in the original manuscript.

The second mode, apart from the name (why "by ranking"? isn't this purely technical approach to facilitate stat analysis?), is less problematic. However, the option to limit analysis to a specific set of terms ("terms of interest") should be mentioned upfront.

Then, the questions arise in what scenarios this would be advantageous? Would this create a bias in the analysis or not, both with regard to outcome and its statistical significance?

We now describe the selection of specific sets at an earlier stage.

#3. The claim of the scope is overreaching. The "function" category, most interesting for cell biology researchers, appears to be extremely frugal, limited just to the crudest distinction between structural, signaling and storage functions. If this perception is correct, the LION would be of limited value for cell biology. The "chemical" properties appear to be a misnomer with chemical information limited purely to structural elements with no regard to reactivity, biochemical synthetic pathways, etc. I would say that, according to this Technical Note, the LION is the ontology linking lipidomics data to biophysical properties of corresponding membranes. The testing of the ontology was performed in a set of assays pertaining to membrane biophysics.

We found a single occurrence of 'cell biology' ('...web-tool bridges the gap between lipidomics and cell biology...') in the initial manuscript. This claim is now phrased with greater caution by '... future expansions of the LION database..., LION/web will be increasingly successful to bridge the gap between lipidomics and cell biology.' (line 216-218). However, we believe that besides 'function', also 'cellular component' and the biophysical properties are of interest for scientists studying cell biology. In addition, we will maintain the LION database and update it when new lipid data and functions of individual lipid species or classes become available (see also our reply to the comment of the expert editorial board member).

#4. It would be advantageous to sync terminology with other ontologies whenever possible, for example, use the GO term "cellular component" instead of "cellular localization", etc. "Lipid component" is a very dubious term for a structural lipid.

As suggested, we replaced the LION-term name "cellular localization" by "cellular component". "Lipid component" was a typo in the manuscript, and not the name of a term in LION. We apologise for this mistake.

#5. The biophysical properties of the vast majority of lipids were inferred from a limited set of literature data. It is therefore of utmost importance to thoroughly describe the approach used. What kind of data the sources provided? Where they for individual lipids or mixes, measured or calculated? How many entries? The equations for the multiple linear (sic!) regression analysis should be shown. The resulting coefficients could be of value by itself - why not publish them here?

We thank the reviewer for noticing the missing word 'linear'. We replaced multiple occurrences of 'multiple regression analysis' by 'multiple linear regression analysis'. As mentioned earlier, we now include a supplemental table with data sources per LION-term. The raw numeric values (per lipid) of the biophysical properties derived from these sources were already provided together with the original manuscript in 'scripts' folder. It is our understanding that this folder is available to the reviewers (and to the public after publication).

We appreciate the suggestion to report the coefficients of the models. To this end, we now include an Excel spreadsheet containing the coefficients of the models, together with input cells to predict (numerical) values of the biophysical properties (Suppl. Data 8).

#6. The lipids appear to be divided into "quintiles" using a hard-to-describe (and almost lacking description in the manuscript) procedure based initially on a number of lipids in each group rather than the value of a biophysical parameter. What is the rationale for this? Does transition temperature of a lipid membrane care how many other membranes share the same value? I think the categorization should be based upon the magnitudes of biophysical properties alone. By the way, how many groups are actually there? The text says 5 but Fig. 2 shows 7... Also, Fig. 2 shows FDR q-values which are not mentioned in either legend or the main text.

We categorized 'transition temperature' into 5 groups: very low, low, etc. These descriptions are not defined and intrinsically subjective: whether a membrane has a low  $T_m$  depends on the context. To provide this context, we selected four lipidomics studies to serve as reference. Lipids from these reference lipidomes were ranked based in the predicted numeric values of the biophysical property. Then, the first 20% (first quintile) was defined as 'very low', the second 20% (second quintile) as 'low', etc. The limits of these quintiles were then used to classify all lipids present in LION. We believe that this approach defines the group limits with more physiological relevance. The alternative approach, based on magnitudes of biophysical properties alone (as suggested by the reviewer) is more likely to yield a quintile 'average' for a group of non-physiological lipids.

The confusing of 5 groups vs. the 7 groups in figure 2 (now figure 3) is related to hierarchy. The groups 'very low ...' and 'low ...' are linked to a parental group called 'below average ...'. The same goes for 'high ...' and 'very high ...', they are linked to 'above average ...'. We updated the figure by adding a graphical representation of this hierarchy to the figure (new figure 3D). The hierarchy of LION-terms is also depicted in supplemental Data S1.

We now include a reference to 'q-values' in the figure legends.

#7. It is not absolutely clear from the manuscript but appears that the enrichment tool relies on the significance of the changes (p-value), as opposed to magnitude, to evaluate enrichment. Is this true? Is it possible that highly significant changes in low abundance lipids would dominate the outcome list without having much effect on the properties of membrane?

All enrichment analyses in the initial version of the manuscript used the ranking-mode with one-tailed t-test p-values to rank the lipids. Other statistical methods could be considered, but every choice has its pros and its cons. Magnitude (fold-change of condition B over condition A) has the undesirable property to overestimate effects when lipid concentrations are close to noise levels: it does not take sample variance into account. In contrast, p-values are more robust, but might be less intuitive to users without strong background in statistics. Using p-values, it is potentially possible that 'highly significant changes in low abundance lipids could dominate the outcome list'. However, most low abundant lipids usually display higher variance due to lower signal/noise levels. As a result, they usually do not generate extreme low p-values.

To provide more flexibility for users and to make the choice of a local statistic explicit, we now offer three local statistics (one-tailed t-test p-values, 2log fold-change, F-test p-values) in the updated version of the web-tool. The statistical method must be selected each time an analysis in the ranking mode is initiated.

#8. More detail should be provided on the statistics, for example, how the distribution curve was generated for K-S analysis, what were the input parameters for the Fisher exact test, etc.

We added more information in the Methods section.

#9. Methods for PDA assay and LC-MS should be brought to compliance with editorial guidelines to allow duplicate these studies. Missing are parameters such as cell number, concentration of the dye, shape of LC gradient, LC system used, MS/MS settings, to name a few. The full name of the Fusion mass spec should be provided because there are several different models. The text is not clear on the sequence of events: it sounds as if analyte ions fly from orbitrap to linear ion trap for detection - is this even possible?

We added details about the PDA in the manuscript.

The methods for LC-MS have now been described in greater detail to facilitate easy replication of experiments. Parallelization of MS1 and MS2 experiments has been clarified to avoid confusion. Current versions of the MS instrument are branded as 'Fusion Lumos' or 'Fusion IDX'. However, the original 'Orbitrap Fusion' mass spectrometer (serial number FSN10438) was branded under that name and this is the

model used in our studies. Therefore, we cannot specify the type of instrument more accurately than we currently do.

#10. With regard to membrane fluidity data, although they show the desired differences they could be made much more convincing with appropriate controls subtracting intrinsic fluorescence of the cells.

The membrane fluidity data presented in the manuscript were subtracted from background fluorescence (blanks were samples with cells but without PDA dye). To make this clear, we updated the Methods section with this information.

#11. Annotating lipids with the "most abundant fatty acid composition" is misleading - if isobaric species are not resolved the overall composition (total carbons, total double bonds) should be shown as primary annotation (possibly followed by the most abundant isomer).

We now include the overall composition as primary annotation, together with a second column containing the most abundant isomer (Data S4). MS/MS analysis allows identification of the most abundant isomer (e.g. PC with a C18:1 and a C18:0 fatty acid) without assignment of the sn1/sn2 position of the respective fatty acids. It is important for experiments such as described in figure 3A to use identifiers containing individual fatty acids. LION-terms related to fatty acids cannot be associated to a dataset that lacks this information. To avoid confusion, we have renamed the lipid species from e.g. PC(18:1/18:0) to PC(18:1\_18:0) to indicate the fatty acid composition of lipid species without sn1/sn2 assignment.

Expert editorial board comments on usability:

The following comments are thus from the perspective of a potential user.

Can the authors specify the source of the 50,000 lipid species included into the analyses? To my knowledge the lipidmaps database reports around 42,000 entries only.

We used the lipid classification system (hierarchy) in accordance with LIPIDMAPS. The individual lipid species in LION were constructed by combining lipid classes with abundant fatty acids. LIPIDMAPS is probably somewhat more stringent about the inclusion of lipid species in their database as they intend to provide additional information for individual species. We added a few lines (231-236) about the construction of individual lipid species in LION to the Methods section.

The number of lipid species linked to experimental or in silico data is more than two orders of magnitudes lower than the indicated number of 50,000 and mainly refers to membrane lipids. Are all of these 50,000 species associated with one or more than one feature? Can the authors comment how many of these 50,000 lipids are associated with features going beyond chemical properties? What kind of cell biological features were used and which of these features were linked to which lipid species? In order to understand and validate the assignments as more detailed description would be helpful.

Many lipids have a number of associations, whereas some lipids only have a few. As a consequence of the hierarchical structure of LION, lipids with only one association will not occur: lipids are (indirectly) associated with the neighbour's neighbour. To make this information more accessible for users, we improved the enrichment-report, which can be obtained by the button 'download report'. It now contains three files: a CSV-file with the enrichment information, a CSV-file containing all the LION-terms associated with the lipids in the dataset, and vice versa, a CSV-file containing all lipids of the dataset with associated LION-terms. With this information, users are better equipped to understand the underlying data structures and improve interpretation of obtained results.

Can the authors comment on why they integrated coarse-grain but not (in addition) atomistic MD data?

|                                |                                                                                                                                                                                                                                                                                                                                                                                                                                                                                                                                                                                                                                                                                                                                                                                                                                                                                                                                                                                                                                                                                                                                                                                                                                                                                                                                                                                                                                                                                                                                                                                                                                                                                                                                                                                                                                                                                                                                                                                                                                                                                                                                                                                                                                                                                                                                                                                                                                                                                                                                                                                                                                                                                                                                                                                                                                                                                                                                                                                                                                                                                                                                                                                                                                                                                                                                                                                                                                                                                                                                                                                                                                                                                                                                                                                                                                                                                                                                                                                                                                                                                   |
|--------------------------------|-----------------------------------------------------------------------------------------------------------------------------------------------------------------------------------------------------------------------------------------------------------------------------------------------------------------------------------------------------------------------------------------------------------------------------------------------------------------------------------------------------------------------------------------------------------------------------------------------------------------------------------------------------------------------------------------------------------------------------------------------------------------------------------------------------------------------------------------------------------------------------------------------------------------------------------------------------------------------------------------------------------------------------------------------------------------------------------------------------------------------------------------------------------------------------------------------------------------------------------------------------------------------------------------------------------------------------------------------------------------------------------------------------------------------------------------------------------------------------------------------------------------------------------------------------------------------------------------------------------------------------------------------------------------------------------------------------------------------------------------------------------------------------------------------------------------------------------------------------------------------------------------------------------------------------------------------------------------------------------------------------------------------------------------------------------------------------------------------------------------------------------------------------------------------------------------------------------------------------------------------------------------------------------------------------------------------------------------------------------------------------------------------------------------------------------------------------------------------------------------------------------------------------------------------------------------------------------------------------------------------------------------------------------------------------------------------------------------------------------------------------------------------------------------------------------------------------------------------------------------------------------------------------------------------------------------------------------------------------------------------------------------------------------------------------------------------------------------------------------------------------------------------------------------------------------------------------------------------------------------------------------------------------------------------------------------------------------------------------------------------------------------------------------------------------------------------------------------------------------------------------------------------------------------------------------------------------------------------------------------------------------------------------------------------------------------------------------------------------------------------------------------------------------------------------------------------------------------------------------------------------------------------------------------------------------------------------------------------------------------------------------------------------------------------------------------------------------|
|                                | <p>To our knowledge, there is no comprehensive lipid dataset available that has been obtained by atomistic molecular dynamics simulations. More importantly, the biophysical properties are categorized into distinct groups (very low, low, average, etc.). Given this categorization in groups, we suspect that the increased resolution of atomistic MD will be of no or very limited added value.</p> <p>Can the authors specify which data of the two papers in particular was included into building the application?</p> <p>We now provide a detailed supplemental table (Data S1) containing references per LION-term. Moreover, the source data and code are available via the script folder.</p> <p>The fact that the application in its current form is restricted to glycerol-based lipids and fatty acids should be indicated in the abstract and in the discussion of the dataset.</p> <p>We agree that the current LION database is not a complete end product. However, it is not true that LION only contains (associations to) glycerol-based lipids and fatty acids. The database includes many more: sphingolipids (sphingomyelins, ceramides, glycosphingolipids), cholesterol derivatives and retinoids. As comprehensive biophysical data about these classes is hardly available or too complex in the case of cholesterol, not all these classes are associated with biophysical properties. The biophysical properties obtained by MD are limited to glycerol-based lipids. The transition temperatures are also associated with sphingomyelins. Cellular component, intrinsic curvature, headgroup charge are associated with many lipid classes. Limitations of LION/web are included in the Discussion section.</p> <p>For this first version of LION the authors included only information from two publications. There is an increasing amount of data available going beyond this information. Can the authors comment on how they plan to allow for integration of additional information? Will users be able to do so in a 'customized' fashion?</p> <p>We recognize the importance to involve users in the improvement of LION and LION/web. To this end, we added several features to the web-tool.</p> <p>(i) We include an option (not selected by default for privacy reasons) that -when selected- informs us when lipids could not be matched to LION. This helps us to keep track of lipid identifiers that are often used, but not present in LION.</p> <p>(ii) We include a contact form on the website to lower the threshold to contact us for questions, requests, suggestions or feedback.</p> <p>Web-tool improvement will not stop after publication. Currently, we are working on features to build heat maps and principle component analyses within the web-tool. When new sources containing useful data become available, this will be added this to the database.</p> <p>The power of application depends on the number of features associated with each lipid species. Can the authors comment on how they plan to advance the data base, e.g., by including the community? Will the application be hosted and if so, what is the perspective?</p> <p>The full ontology, R-packages to perform enrichment analysis and R-code for the web-tool is publicly available. This is sufficient for experienced users to build customized versions of LION or the web-tool. We understand, however, that this will be challenging for inexperienced users. In the future, we plan to build a dedicated LION R-package with detailed instructions and guidelines to augment the ontology by individual users. An R-package provides more flexibility than a web-tool and the use of user-customized ontology versions will be easier to support.</p> <p>The web-tool is currently hosted by Shinyapps.io. It will be hosted elsewhere in case this service discontinuous its operation. The domain name lipidontology.com is owned by the department and the web-tool LION/web will remain accessible via lipidontology.com.</p> |
| <b>Additional Information:</b> |                                                                                                                                                                                                                                                                                                                                                                                                                                                                                                                                                                                                                                                                                                                                                                                                                                                                                                                                                                                                                                                                                                                                                                                                                                                                                                                                                                                                                                                                                                                                                                                                                                                                                                                                                                                                                                                                                                                                                                                                                                                                                                                                                                                                                                                                                                                                                                                                                                                                                                                                                                                                                                                                                                                                                                                                                                                                                                                                                                                                                                                                                                                                                                                                                                                                                                                                                                                                                                                                                                                                                                                                                                                                                                                                                                                                                                                                                                                                                                                                                                                                                   |
| <b>Question</b>                | <b>Response</b>                                                                                                                                                                                                                                                                                                                                                                                                                                                                                                                                                                                                                                                                                                                                                                                                                                                                                                                                                                                                                                                                                                                                                                                                                                                                                                                                                                                                                                                                                                                                                                                                                                                                                                                                                                                                                                                                                                                                                                                                                                                                                                                                                                                                                                                                                                                                                                                                                                                                                                                                                                                                                                                                                                                                                                                                                                                                                                                                                                                                                                                                                                                                                                                                                                                                                                                                                                                                                                                                                                                                                                                                                                                                                                                                                                                                                                                                                                                                                                                                                                                                   |



|                                                                                                                                                                                                                                                                                                                                                                                                                                                                                                                                     |            |
|-------------------------------------------------------------------------------------------------------------------------------------------------------------------------------------------------------------------------------------------------------------------------------------------------------------------------------------------------------------------------------------------------------------------------------------------------------------------------------------------------------------------------------------|------------|
| <p>Are you submitting this manuscript to a special series or article collection?</p>                                                                                                                                                                                                                                                                                                                                                                                                                                                | <p>No</p>  |
| <p><b>Experimental design and statistics</b></p> <p>Full details of the experimental design and statistical methods used should be given in the Methods section, as detailed in our <a href="#">Minimum Standards Reporting Checklist</a>. Information essential to interpreting the data presented should be made available in the figure legends.</p> <p>Have you included all the information requested in your manuscript?</p>                                                                                                  | <p>Yes</p> |
| <p><b>Resources</b></p> <p>A description of all resources used, including antibodies, cell lines, animals and software tools, with enough information to allow them to be uniquely identified, should be included in the Methods section. Authors are strongly encouraged to cite <a href="#">Research Resource Identifiers</a> (RRIDs) for antibodies, model organisms and tools, where possible.</p> <p>Have you included the information requested as detailed in our <a href="#">Minimum Standards Reporting Checklist</a>?</p> | <p>Yes</p> |
| <p><b>Availability of data and materials</b></p> <p>All datasets and code on which the conclusions of the paper rely must be either included in your submission or deposited in <a href="#">publicly available repositories</a> (where available and ethically appropriate), referencing such data using a unique identifier in the references and in the “Availability of Data and Materials” section of your manuscript.</p> <p>Have you have met the above requirement as detailed in our <a href="#">Minimum</a></p>            | <p>Yes</p> |

[Standards Reporting Checklist?](#)

[Click here to view linked References](#)

1  
2  
3  
4  
5  
6  
7  
8  
9  
10  
11  
12  
13  
14  
15  
16  
17  
18  
19  
20  
21  
22  
23  
24  
25  
26  
27  
28  
29  
30  
31  
32  
33  
34  
35  
36  
37  
38  
39  
40  
41  
42  
43  
44  
45  
46  
47  
48  
49  
50  
51  
52  
53  
54  
55  
56  
57  
58  
59  
60  
61  
62  
63  
64  
65

# **LION/web: a web-based ontology enrichment tool for lipidomic data analysis**

Martijn R. Molenaar<sup>§</sup>, Aike Jeucken<sup>§</sup>, Tsjerk A. Wassenaar<sup>‡</sup>, Chris H. A. van de Lest<sup>§</sup>, Jos F.  
Brouwers<sup>§</sup>, J. Bernd Helms<sup>\*§</sup>

<sup>§</sup> Department of Biochemistry and Cell Biology, Faculty of Veterinary Medicine, Utrecht  
University, 3584 CM, Utrecht, The Netherlands

<sup>‡</sup> Groningen Biomolecular Sciences and Biotechnology Institute and Zernike Institute for  
Advanced Materials, University of Groningen, Nijenborgh 7, 9747 AG Groningen, The  
Netherlands

\* To whom correspondence should be addressed: J.B.H (J.B.Helms@uu.nl)

1 **ABSTRACT**

2 **A major challenge for lipidomic analyses is the handling of the large amounts of data**  
3 **and the translation of results to interpret the involvement of lipids in biological systems.**  
4 **We built a new lipid ontology (LION) that associates over 50,000 lipid species to**  
5 **biophysical, chemical and cell biological features. By making use of enrichment**  
6 **algorithms, we used LION to develop a web-based interface (LION/web,**  
7 **[www.lipidontology.com](http://www.lipidontology.com)) that allows identification of lipid-associated terms in lipidomes.**  
8 **LION/web was validated by analyzing a lipidomic dataset derived from well-**  
9 **characterized sub-cellular fractions of RAW 264.7 macrophages. Comparison of isolated**  
10 **plasma membranes with the microsomal fraction showed a significant enrichment of**  
11 **relevant LION-terms including ‘plasma membrane’, ‘headgroup with negative charge,**  
12 **‘glycerophosphoserines’, ‘above average bilayer thickness’, and ‘below average lateral**  
13 **diffusion’. A second validation was performed by analyzing the membrane fluidity of**  
14 **CHO cells incubated with arachidonic acid. An increase in membrane fluidity was**  
15 **observed both experimentally by using pyrene decanoic acid and by using LION/web,**  
16 **showing significant enrichment of terms associated with high membrane fluidity (‘above**  
17 **average’, ‘very high’ and ‘high lateral diffusion’, and ‘below average transition**  
18 **temperature’). The results demonstrate the functionality of LION/web, which is freely**  
19 **accessible in a platform-independent way.**

20  
21 **KEYWORDS**

22 lipidomics; lipids; membrane biology; lipid ontology; LION; LION-term enrichment analysis;  
23 membrane biology; web-tool; data analysis; LION/web

25 **BACKGROUND**

26 The comprehensive study of lipids, also termed lipidomics, is gaining momentum.  
27 Instrumentation is becoming increasingly more sensitive, precise and fast, and the use of  
28 lipidomics to address key questions in membrane biology has become widespread. As a result,  
29 datasets are rapidly increasing both in terms of size and complexity. Due to a lack of methods  
30 to perform global and in-depth data mining, lipidomic research tends to focus on individual  
31 lipid classes or lipid species. A common approach in other ‘omics’ disciplines to reduce  
32 complexity is the use of ontologies *e.g.*, Gene Ontology [1], Chemical Entities of Biological  
33 Interest ontology [2], combined with statistical tools to determine terms of interest. Although  
34 lipid structure is closely related to lipid function, it is currently impossible to associate  
35 properties of individual lipids with complex lipid mixtures of cellular lipidomes. Examples of  
36 biophysical properties that play an important role in membrane biology are numerous and  
37 include membrane thickness (*e.g.*, as driving force in the sub-cellular localization of proteins  
38 [3]), membrane fluidity (*e.g.*, regulating bacterial survival [4], membrane heterogeneity in  
39 cellular signaling [5]), intrinsic curvature (*e.g.*, of lipids as key player in lipid droplet  
40 biogenesis [6,7] or COPI coat disassembly [8]), and net charge (*e.g.*, of membranes as a  
41 determinant in lipid-protein interactions [9]). Here, we aim to provide a lipid ontology  
42 database and complementary enrichment analysis tool that (i) contains chemical and  
43 biophysical information of lipid species, (ii) is platform independent and compatible with  
44 routine mass spectrometry-based lipid analysis, (iii) can be used by researchers without  
45 computer programming skills, and (iv) is freely available to the scientific community.

1  
2  
3  
4  
5  
6  
7  
8  
9  
10  
11  
12  
13  
14  
15  
16  
17  
18  
19  
20  
21  
22  
23  
24  
25  
26  
27  
28  
29  
30  
31  
32  
33  
34  
35  
36  
37  
38  
39  
40  
41  
42  
43  
44  
45  
46  
47  
48 **FINDINGS**

49 *Basic structure of LION*

50 We constructed an ontology database called LION (**File S1**) that links over 50,000 lipid  
51 species with four major branches: ‘lipid classification’ (the LIPIDMAPS classification  
52 hierarchy [10]), ‘chemical and physical properties’ (fatty acid length and unsaturation,  
53 headgroup charge, intrinsic curvature, membrane fluidity, bilayer thickness), ‘function’, and  
54 ‘subcellular component’ (predominant subcellular localisation). The resulting database  
55 contains more than 250,000 connections (‘edges’), providing a detailed system for in-depth  
56 annotation of lipids. An example of all LION-terms associated with a single  
57 phosphatidylserine (PS) lipid species, PS(34:2), is depicted in **Figure S1**. We describe the  
58 construction of LION in more detail in the Methods section. All LION-terms, classification  
59 rules and references are described in **Data S1**, all lipids currently supported by LION are  
60 described in **Data S2**.

61  
62 *Addition of biophysical properties to LION*

63 An important feature of LION is the association of lipid species with biophysical properties.  
64 We made use of experimental data (from five phospholipid classes and sphingomyelin) [11]  
65 and data (from five phospholipid classes) obtained by coarse-grain molecular dynamics  
66 simulation (CG-MD) [12], each providing distinct biophysical properties . These data were  
67 used to estimate the biophysical properties of all related lipids in the LION-database by  
68 multiple linear regression analysis.

69 The regression models were validated in two ways. First, we performed leave-one-out cross-  
70 validations (LOOCV) of all three models (**Fig. S2 A-C**), showing satisfactory agreement  
71 between determined and predicted values. Second, we compared two properties closely  
72 associated with membrane fluidity: ‘transition temperature’ (from experimental datasets) and  
73 ‘lateral diffusion’ (from the CG-MD datasets) (**Fig. S2 D**). As expected, lipids with low

1  
2  
3  
4  
5  
6  
7  
8  
9  
10  
11  
12  
13  
14  
15  
16  
17  
18  
19  
20  
21  
22  
23  
24  
25  
26  
27  
28  
29  
30  
31  
32  
33  
34  
35  
36  
37  
38  
39  
40  
41  
42  
43  
44  
45  
46  
47  
48  
49  
50  
51  
52  
53  
54  
55  
56  
57  
58  
59  
60  
61  
62  
63  
64  
65

74 transition temperatures were predicted to have high lateral diffusion values at a defined  
75 simulation temperature and vice versa.  
76 Subsequently, all numerical datapoints for each biophysical property were categorized into  
77 five pre-defined groups ('very low', 'low', 'average', 'high', 'very high'). We aimed to find  
78 group definitions with physiological relevance. Therefore, limits of each group were  
79 calculated on the basis of four mammalian lipidomics publications that served as a reference  
80 [13-16]. Using these group definitions, numerical values of all applicable lipid species present  
81 in LION were classified and connected to their respective LION-term (Fig. S2 E).

### 83 *LION enrichment analysis and web-tool LION/web*

84 Next, we used LION as a basis to build an ontology enrichment tool that facilitates reduction  
85 of lipidome complexities in an unbiased manner. To this end, we made use of an adapted  
86 version of 'topGO', an R-package designed for enrichment analysis of GO-terms [17].  
87 Subsequently, we designed a web-tool with R-package Shiny ('LION/web',  
88 [www.lipidontology.com](http://www.lipidontology.com)) that offers an intuitive user-interface and supports two major  
89 workflows (Fig. 1): enrichment analysis of a subset of lipids of interest ('target-list mode')  
90 and enrichment analysis performed on a complete and ranked list of lipids ('ranking mode',  
91 referred to as 'SAFE' and described in the context of genes [18]). A detailed step-by-step  
92 description of LION/web's workflow can be found in Note S1.  
93 Analogous to Gene Ontology enrichment approaches [1], which facilitate pre-selection of  
94 ontology sub-domains or subsets of GO-terms ('GO-slits'), LION/web offers the option to  
95 limit analysis to specific LION-terms of interest. Furthermore, the web-tool allows removal of  
96 the most generic LION-term (the one with the highest hierarchy) if a related term contains the  
97 same subset of lipids. For example, the term 'diacylglycerophosphocholines' might be  
98 associated with the same lipids as 'glycerophosphocholines'. With this option switched on,  
99 only the most specific term ('diacylglycerophosphocholines') is included in the results.

100

1  
2  
3 101 ***Performance of ‘target-list mode’ by LION/web***

4  
5 102 To test the functionality of LION/web, we made use of a previously published and well  
6  
7 103 characterized dataset containing lipidomics data from several sub-cellular fractions of RAW  
8  
9 104 264.7 macrophages, with or without TLR-4 activation by Kdo<sub>2</sub>-lipid A (KLA) [13] (see  
10  
11 105 Methods for a direct link to the dataset). First, we re-normalized the dataset by expressing all  
12  
13 106 lipid species as fraction of the total amount of lipid per sample. Subsequently, the data were  
14  
15 107 visualized by constructing a heat map graph (Fig. 2 A). Lipid species were grouped into 10  
16  
17 108 clusters by hierarchical clustering. Each lipid cluster was subsequently analyzed by  
18  
19 109 LION/web, which was able to reformat and match the vast majority (>97%) of the submitted  
20  
21 110 lipids in the dataset. In the ‘target-list mode’, LION/web assesses the enrichment of LION-  
22  
23 111 terms in a subset of lipids, as compared to all lipids in the experiment. For every cluster, lipids  
24  
25 112 (Data S3) were entered as target-list and compared with the background list. Enrichment  
26  
27 113 analysis of all 10 clusters resulted in at least one significant LION-term (Fig. 2 B). The heat  
28  
29 114 map showed that lipids present in clusters 7 and 8 were abundant in the mitochondrial  
30  
31 115 fractions (Fig. 2 A). In line with this observation, enrichment analyses of these clusters  
32  
33 116 resulted in significant terms associated with this organelle (e.g.,  
34  
35 117 ‘diacylglycerophosphoethanolamines’, ‘mitochondrion’, ‘diacylglycerophosphoglycerols’,  
36  
37 118 ‘headgroup with negative charge’). Similar results were obtained for cluster 6 (terms related  
38  
39 119 to the plasma membrane), and to lesser extent for cluster 9 (terms related to endoplasmic  
40  
41 120 reticulum). Lipids in cluster 5 were more abundant in KLA-treated fractions and resulted in  
42  
43 121 terms reported by LION/web that were associated with low membrane fluidity.  
44  
45  
46  
47  
48  
49  
50  
51

122

52 123 ***Performance of ‘ranking mode’ by LION/web***

53  
54  
55 124 An alternative method to assess enrichment of LION-terms in LION/web is the ‘ranking-  
56  
57 125 mode’. In the ‘ranking-mode’, all individual lipid species of two conditions are compared and  
58  
59 126 ranked based on a ‘local’ statistic. This local statistic is any numeric value that associates



127 individual (hence ‘local’) lipids with the provided conditions. LION/web supports three  
128 different local statistics: one-tailed Welch two sample t-tests *P*-values (comparison of 2  
129 conditions); <sup>2</sup>log fold-change values (comparison of 2 conditions) and one-way ANOVA *F*-  
130 tests *P*-values (comparison of >2 conditions). Subsequently, the distributions of all associated  
131 LION-terms over the ranked list are compared to uniform distributions by using one-tailed  
132 Kolmogorov–Smirnov tests (‘global’ statistics, as full lipidomes are assessed). A LION-term  
133 is enriched when its associated lipids are higher ranked than expected by chance. To illustrate  
134 the ‘ranking mode’, we compared the isolated PM fraction (samples #19-21 from Fig. 2 A)  
135 with the ER fraction (samples #13-15 from Fig. 2 A) from non-stimulated macrophages using  
136 one-tailed Welch two sample t-tests *P*-values as local statistic. Subsequently, LION/web  
137 assessed all LION-terms for enrichment (Fig. 2 C). In good agreement with current  
138 descriptions of the selected organelles [19,20], significant enriched LION-terms included  
139 terms associated with chemical descriptions (*e.g.*, ‘glycerophosphoserines’, ‘headgroup with  
140 negative charge’, ‘phosphosphingolipids’), biological features (‘plasma membrane’) and  
141 biophysical properties (*e.g.*, ‘above average bilayer thickness’, ‘below average lateral  
142 diffusion’, ‘very low lateral diffusion’, ‘very high bilayer thickness’, ‘neutral intrinsic  
143 curvature’). LION/web also reported the significant enrichment of ‘very high transition  
144 temperature’, which is in line with the (very) low lateral diffusion terms (see also Fig. S2 D).  
145 The term ‘very low transition temperature’ was also reported to be significantly enriched.  
146 Inspection of the lipid species responsible for the LION-term ‘very low transition  
147 temperature’ revealed the presence of lipids that all contain polyunsaturated fatty acids  
148 (PUFAs) with at least four unsaturations. This may be a macrophage-specific phenomenon,  
149 related to their involvement in inflammation [21].

150

### 151 *Enrichment performance of chemical and biophysical LION-terms*

152 To further characterize the enrichment of chemical and biophysical properties by LION/web,  
153 we used two different experimental approaches. First, we investigated the enrichment of

154 **chemical features that can be easily incorporated into lipids.** To this end, CHO-k1 cells were  
155 incubated overnight in the presence of palmitic acid (PA), linoleic acid (LA) or arachidonic  
156 acid (AA) complexed to bovine serum albumin (BSA). Subsequently, lipids were analysed by  
157 LC-MS/MS and quantified. When available, we used MS/MS data to annotate lipids with  
158 their most abundant fatty acid composition. **This level of annotation is important as it enables**  
159 **LION to link input lipids with terms associated with fatty acids (Data S4 and Fig. S3).** Next,  
160 **the web-tool was set to use the ‘ranking mode’ and to limit analysis to LION-terms indicating**  
161 **the presence of fatty acids as lipid building blocks.** LION/web reliably reported the significant  
162 enrichment of the respective fatty acid in the three different conditions (**Fig. 3 A** and **Data**  
163 **S5**).

164 Second, to investigate the enrichment of biophysical LION-terms, we incubated CHO-k1 cells  
165 with arachidonic acid (AA). This procedure is known to increase membrane fluidity [22].  
166 After incubation, the membrane fluidity properties of the samples were analyzed both  
167 experimentally and by LION/web. Membrane fluidity was experimentally assessed using  
168 pyrene decanoic acid (PDA) (**Fig. 3 B**). This fluorescent probe can exist as monomer or  
169 excimer, resulting in a shift of its emission spectrum. The ratio of excimer over monomer  
170 fluorescence is proportional to the degree of membrane fluidity [23]. As expected, the ratio of  
171 excimer/monomer forms of PDA revealed a significant increase in membrane fluidity of  
172 lysates in the presence of AA (**Fig. 3 C**). For parallel LION/web analysis of membrane  
173 fluidity properties, lipids were extracted from the same samples and analysed by LC-MS/MS  
174 (**Data S6** and **Fig. S4**). LION contains two sets of terms associated with membrane fluidity:  
175 ‘transition temperature’ and ‘lateral diffusion’. Accordingly, LION/web was set to limit  
176 enrichment analyses to these sets, after which the lipidomic data were analyzed (‘ranking  
177 mode’). In line with the experimentally measured increase in membrane fluidity, terms  
178 associated with high membrane fluidity (‘above average’, ‘very high’ and ‘high lateral  
179 diffusion’, and ‘below average transition temperature’) were significantly enriched in cells  
180 that had been treated with AA (**Fig. 3 D** and **Data S7**).

181

182 **DISCUSSION**

183 Despite the quick grow of lipidomics and the rise of many tools to process raw data into lipid  
184 compositions [24], no automated pipeline to reduce complexity in lipidomic datasets using  
185 prior knowledge was yet available. Such a tool facilitates the generation of hypotheses, which  
186 is an important aim in many omics experiments. Here, we have presented a new ontology  
187 called LION and have used this ontology to build a web-based online LION-term enrichment  
188 tool suited to fulfill this need. In a single analysis, trends in complex lipidomic datasets can  
189 now be assessed in a standardized way. The web-tool assures that the pipeline is accessible to  
190 users that are not familiar with programming languages.

191 Just like enrichment analysis approaches in other omics fields, LION-term enrichment  
192 analysis comes with specific strengths and limitations. The quality and coverage of the  
193 underlying ontology is of great importance. For LION, we aimed to support most commonly  
194 found lipid species in mammalian systems. In our examples, >85% of the input lipids could  
195 be matched to the ontology. Due to the great diversity of lipidomes in different organisms, this  
196 coverage could be lower in user-provided datasets from non-mammalian systems. We hope  
197 to support LION's coverage of plant, bacterial and yeast lipidomes better in the future.  
198 LION/web offers users several feedback options to keep track of missing annotations and to  
199 act specifically upon users' needs.

200 It is important to note that the enrichment of biophysical properties such as membrane  
201 fluidity, membrane thickness and curvature cannot replace functional assays. More factors  
202 than lipids alone – protein composition, temperature - are playing important roles. Moreover,  
203 the effect of cholesterol is complex and depends on the interaction with other lipids.

204 Therefore, the biophysical effects of cholesterol are not included. Also, the relative amounts  
205 of lipids in the described enrichment analysis methods are not taken into account: low  
206 abundant lipids contribute equally to enrichment as their high abundant counterparts.

207 This limitation can be circumvented by defining local statistics that takes abundancies into

1  
2  
3  
4  
5  
6  
7  
8  
9  
10  
11  
12  
13  
14  
15  
16  
17  
18  
19  
20  
21  
22  
23  
24  
25  
26  
27  
28  
29  
30  
31  
32  
33  
34  
35  
36  
37  
38  
39  
40  
41  
42  
43  
44  
45  
46  
47  
48  
49  
50  
51  
52  
53  
54  
55  
56  
57  
58  
59  
60  
61  
62  
63  
64  
65

208 account. This type of statistic will become more urgent when lipidomic analyses shifts from  
209 mostly semi-quantitative to quantitative analyses in the future.  
210 In summary, LION/web reveals changes in lipid patterns that allow researchers to study the  
211 complexity of lipidomes in a biological context. With future expansions of the LION database  
212 and of LION/web (also upon request of the scientific community), LION/web will be  
213 increasingly successful to bridge the gap between lipidomics and cell biology.

214

## 215 METHODS

### 216 Creation of lipid ontology (LION)

217 We built an ontology database that connects lipid species to the following four major  
218 branches: ‘lipid classification’, ‘function’, ‘cellular component’ and ‘physical or chemical  
219 properties’. For readability, a term is included at the top of each branch to indicate the nature  
220 of a LION-branch. These ‘category’ terms are distinguished from other LION-terms with an  
221 ID containing the prefix ‘CAT’.

222 The classification system is based on the LIPIDMAPS classification [10]. LIPIDMAPS does  
223 not support lipid species with summed fatty acid. However, this extra layer is useful as it  
224 enables mapping or when exact fatty acid compositions of measured lipids are not known.

225 This concept is also used in the Swiss Lipids system [25]. Downstream, individual lipid  
226 species belonging to classes described in **Data S1** were constructed as combinations of the  
227 following fatty acids: C12:0; C14:0; C14:1; C16:0; C16:1; C18:0; C18:1; C18:2; C18:3;  
228 C20:0; C20:1; C20:2; C20:3; C20:4; C20:5; C22:0; C22:1; C22:2; C22:3; C22:4; C22:5;  
229 C22:6; C24:0; C24:1; C24:2; C24:3; C24:4; C24:5; C24:6; C26:0; C26:1; C26:2; C26:3;  
230 C26:4; C26:5; C26:6 and C26:7. For sphingolipids, sphingosine (d18:1) and sphinganine  
231 (d18:0) were used as possible backbones. In the current version, LION does not distinguish  
232 between *sn*-positions. Fatty acids were ordered by chain length (low to high) and number of  
233 unsaturations (low to high). Altogether, LION contains circa 50,000 lipid species.

1  
2  
3  
4  
5  
6  
7  
8  
9  
10  
11  
12  
13  
14  
15  
16  
17  
18  
19  
20  
21  
22  
23  
24  
25  
26  
27  
28  
29  
30  
31  
32  
33  
34  
35  
36  
37  
38  
39  
40  
41  
42  
43  
44  
45  
46  
47  
48  
49  
50  
51  
52  
53  
54  
55  
56  
57  
58  
59  
60  
61  
62  
63  
64  
65

234 The branch ‘function’ comprises three subcategories: ‘membrane component’ (associated with  
235 lipids that are primary regarded as structural component of lipid bilayers), ‘lipid-mediated  
236 signaling’ (lipids that have been implicated in signaling) and ‘lipid-storage’ (lipids that are  
237 associated with storage, primarily in lipid droplets). In the category ‘cellular component’,  
238 lipid classes that are enriched in particular cellular organelles are linked to their  
239 corresponding organelle terms [7,19,20]. The branch ‘physical or chemical properties’  
240 comprises a number of subcategories. First, a number of chemical descriptions (‘contains  
241 fatty acid’, ‘fatty acid unsaturation’, ‘fatty acid length’ and ‘type by bond’) was inferred from  
242 the species names. Second, data about ‘intrinsic curvature’ [7,26] were categorized into either  
243 negative, neutral or positive curvature. As data on species-level are limited, curvature was  
244 assumed to be predominantly headgroup-dependent and fatty acid composition was neglected.  
245 The third subcategory, ‘charge headgroup’, was divided into three groups based on structural  
246 data: ‘negative’, ‘positive/zwitter-ion’ and ‘neutral’ [25]. This last term comprises also lipids  
247 lacking a headgroup. The fourth subcategory in ‘physical or chemical properties’ is ‘chain-  
248 melting transition temperature’. This property is derived from a number of sources,  
249 comprehensively reviewed by Marsh [11]. This dataset covers a range of lipid classes in both  
250 glycerophospholipids (PC, PE, PG, PA, PS) and sphingolipids (SM). We made use of multiple  
251 linear regression analysis with lipid class, fatty acid length and unsaturation as predictors to  
252 facilitate data extrapolation to previously unreported lipid species. The obtained model  
253 (coefficients are available via **Data S8**) was validated by leave-one-out cross-validation  
254 (LOOCV). Briefly, one datapoint from the dataset was taken out, after which the model was  
255 rebuilt with the remaining points as training set. Subsequently, the selected datapoint was  
256 used as validation sample. This procedure was repeated for all the datapoints (**Fig. S2 C**).  
257 **Ontologies contain categorical data and are not compatible with numeric values. Therefore,**  
258 **we classified chain-melting transition temperature values into five distinct categorical data**  
259 **groups: ‘very low’, ‘low’, ‘average’, ‘high’ or ‘very high’ chain-melting transition temperature.**  
260 **To define the limits of these intrinsic subjective groups, we used four previously reported**

1  
2  
3  
4  
5  
6  
7  
8  
9  
10  
11  
12  
13  
14  
15  
16  
17  
18  
19  
20  
21  
22  
23  
24  
25  
26  
27  
28  
29  
30  
31  
32  
33  
34  
35  
36  
37  
38  
39  
40  
41  
42  
43  
44  
45  
46  
47  
48  
49  
50  
51  
52  
53  
54  
55  
56  
57  
58  
59  
60  
61  
62  
63  
64  
65

261 datasets to serve as reference lipidomes [13–16]. From all reported lipids, the transition  
262 temperature was predicted by the model. The obtained transition temperature distribution was  
263 used to define the groups: the lowest 20% (first quintile) was classified as ‘very low’, the  
264 second 20% (second quintile) as ‘low’, etc. Subsequently, these limits were used to categorize  
265 all lipid species present in LION. Lipids with transition temperature values lower than the  
266 lowest limit were defined as ‘very low’, whereas values higher than the highest limit were  
267 defined as ‘very high’. A flow-chart of this procedure is depicted in **Fig. S2 E**.

268 In addition to these experimental data sets, we also used data [12] that was obtained by coarse  
269 grain molecular dynamics simulation (MARTINI force-field [27]) and which includes  
270 membrane properties ‘bilayer thickness’ and ‘lateral diffusion’. The dataset contains lipids  
271 from five common classes of glycerophospholipids (PC, PS, PG, PA, PE), but lacks  
272 sphingolipids and sterols. By definition, coarse-grained lipids represent a range of structures.  
273 To be able to use the dataset in the ontology system, names of coarse-grained lipids were  
274 translated into their representing counterparts. Subsequently, lipid properties were  
275 extrapolated to the entire database by multiple **linear** regression analysis models (with lipid  
276 class, fatty acid length and unsaturation as predictors, coefficients are available via **Data S8**)  
277 and validated by LOOCV (**Fig. S2 A-B**). We followed the same procedure as used for  
278 transition temperatures; extrapolated results for both properties were **categorized into**  
279 **representative classes: ‘very low’, ‘low’, ‘average’, ‘high’ or ‘very high’**, based on values,  
280 predicted by our models, of the **reference** datasets [13–16].

281 The initial structure of LION was built with OBOEdit v.2.3.1 [28] and formatted as OBO-file.  
282 Subsequently, custom R-scripts connected specific terms with more general terms based on  
283 the described datasets. The entire ontology can be found as **File S1**.

## 284 **Implementation of enrichment analysis tool**

285 To use LION with existing ontology enrichment tools, we used an adapted and generalized  
286 version of Bioconductor R-package ‘topGO’ [17]. This version, called ‘topOnto’, allows users  
287 to include ontologies other than those provided with the package. TopOnto’s attached Perl-

1  
2  
3  
4  
5  
6  
7  
8  
9  
10  
11  
12  
13  
14  
15  
16  
17  
18  
19  
20  
21  
22  
23  
24  
25  
26  
27  
28  
29  
30  
31  
32  
33  
34  
35  
36  
37  
38  
39  
40  
41  
42  
43  
44  
45  
46  
47  
48  
49  
50  
51  
52  
53  
54  
55  
56  
57  
58  
59  
60  
61  
62  
63  
64  
65

288 script was used to convert the ontology file from OBO- to SQLite-format. Apart from this  
289 extra feature, the ‘topOnto’ package provides the same functionality as the original version.  
290 To perform the enrichment analysis, two statistical approaches are used. In the ‘target-list  
291 mode’, one-tailed Fisher-exact statistics are used to test enrichment. To this end, 2x2  
292 contingency tables are constructed for every LION-term, containing the number of lipids  
293 associated and not associated with the given term for both the target-list and the background  
294 set, and analyzed. In the ‘ranking mode’, one-tailed Kolmogorov-Smirnov tests are used as  
295 ‘global’ statistics to assess enrichment of LION-terms over a ranked (by ‘local’ statistics) list  
296 of lipids. For every LION-term, the cumulative distribution of associated lipids over the  
297 ranked list is compared with the uniform distribution. Enrichment is defined as over-  
298 representation of highly ranked lipids associated with the term. To rank input lipids,  
299 LION/web offers three different ‘local’ statistics: *P* values from one-tailed Welch t-tests (2  
300 condition comparison), <sup>2</sup>log fold-change values (2 condition comparison) and *P* values from  
301 one-way ANOVA F-tests (>2 conditions comparison). Ranking direction (from high to low, or  
302 vice versa) is automatically updated after local statistic selection, but can be set manually. In  
303 addition, users can use custom local statistics. In both modes, topGO’s classic algorithm is  
304 selected [17]. After LION enrichment analysis, raw *P* values are corrected for multiple testing  
305 (Benjamini-Hochberg). The R-scripts were used to build the user-friendly web-based tool  
306 LION/web (Note S1) with R-package ‘shiny’. The application has been made available on the  
307 shinyapps.io server as a free online tool, accessible through <http://www.lipidontology.com/>.

### 309 **Cell culture and preparation of fatty acid-albumin complexes**

310 CHO-k1 cells were cultured in Ham’s F-12 medium (Thermo Fisher Scientific, Waltham,  
311 MA, USA) supplemented with 7.5% FBS (Thermo Fisher Scientific, Waltham, MA, USA),  
312 100 units/ml penicillin and 100 µg/ml streptomycin (Thermo Fisher Scientific, Waltham, MA,  
313 USA). Cells were grown in a humidified incubator at 37°C containing 5% CO<sub>2</sub> and passaged

1  
2  
3  
4  
5  
6  
7  
8  
9  
10  
11  
12  
13  
14  
15  
16  
17  
18  
19  
20  
21  
22  
23  
24  
25  
26  
27  
28  
29  
30  
31  
32  
33  
34  
35  
36  
37  
38  
39  
40  
41  
42  
43  
44  
45  
46  
47  
48  
49  
50  
51  
52  
53  
54  
55  
56  
57  
58  
59  
60  
61  
62  
63  
64  
65

314 twice a week. Stocks of 10 mM arachidonic acid, linoleic acid, oleic acid, or palmitic acid (all  
315 obtained from Sigma, St. Louis, MO, USA) were complexed to 2 mM fatty-acid free BSA  
316 (Sigma, St. Louis, MO, USA), filter-sterilized and stored at  $-20^{\circ}\text{C}$ . **Control incubations**  
317 **without fatty acid contained equivalent amounts of fatty-acid free BSA.** All experimental  
318 incubations were performed in plastic 6-well culture dishes (Corning, Tewksbury, MA, USA).

### 319 **Measuring membrane fluidity**

320 After overnight incubation in the absence or presence of fatty-acids (using fatty acid-free BSA  
321 or fatty acids coupled to BSA, respectively), cells were washed and scraped in PBS. Cells  
322 were subsequently homogenized on ice with 26-gauge needles (BD Bioscience, San Jose, CA,  
323 USA). Homogenates **(equivalent to 40,000 cells)** were mixed **1:1** with the manufacturer's  
324 supplied dilution buffer (Membrane fluidity kit, Abcam, Cambridge, UK) **in the absence**  
325 **(background) or presence of  $5\ \mu\text{M}$  pyrenedecanoic acid (PDA)** and transferred into a 96-well  
326 plate (black plastic with glass bottom, Greiner Bio-One, Frickenhausen, Germany). After 30  
327 minutes of incubation at  $37^{\circ}\text{C}$ , fluorescence spectra (excitation at 360 nm, emission between  
328 375-500 nm,  $37^{\circ}\text{C}$ ) were measured with a temperature-controlled fluorescence microplate  
329 reader (CLARIOstar, BMG Labtech, Offenburg, Germany). Data were processed in R by  
330 expressing monomer (370-390 nm) and excimer (470-490 nm) as ratios of mean fluorescence  
331 after **subtraction of background fluorescence (samples with cells but without PDA)**. Results  
332 were expressed as means. Differences were analyzed by two-tailed Welch's t-tests.

### 334 **Lipidomics by LC-MS/MS**

335 After incubation, lipids were extracted as described before [29]. **Lipid extracts were dried**  
336 **under nitrogen and dissolved in  $100\ \mu\text{L}$  chloroform/methanol (1:1) and injected ( $10\ \mu\text{L}$ ) on a**  
337 **hydrophilic interaction liquid chromatography (HILIC) column ( $2.6\ \mu\text{m}$  HILIC  $100\ \text{\AA}$ ,  $50\ \times$**   
338  **$4.6\ \text{mm}$ , Phenomenex, Torrance, CA). Lipid classes were separated by gradient elution on an**  
339 **Infinity II 1290 UPLC (Agilent, Santa Clara, CA, USA). At a constant flow rate of  $1\ \text{ml/min}$ ,**



1  
2  
3  
4  
5  
6  
7  
8  
9  
10  
11  
12  
13  
14  
15  
16  
17  
18  
19  
20  
21  
22  
23  
24  
25  
26  
27  
28  
29  
30  
31  
32  
33  
34  
35  
36  
37  
38  
39  
40  
41  
42  
43  
44  
45  
46  
47  
48  
49  
50  
51  
52  
53  
54  
55  
56  
57  
58  
59  
60  
61  
62  
63  
64  
65

340 ACN/acetone (9:1, v/v) was used as solvent A. Solvent B consisted of a mixture of ACN/H<sub>2</sub>O  
341 (7:3, v/v) with 10mM ammonium formate. Both solvents contained 0.1% formic acid. The  
342 gradient was as follows (time in min, %B): (0, 0), (1, 50), (3, 50), (3.1, 100), (4, 100).  
343 Samples were injected without re-equilibration of the column. The column effluent was  
344 connected to a heated electrospray ionization (hESI) source of an Orbitrap Fusion mass  
345 spectrometer (Thermo Scientific, Waltham, MA) operated at -3600V in the negative  
346 ionization mode. Temperatures for the vaporizer and ion transfer tube were 275°C and 380°C,  
347 respectively. Full scan MS1 measurements in the mass range from 450 to 1150 amu were  
348 collected in the orbitrap at a resolution of 120,000. Parallelized data-dependent MS2  
349 experiments were done with HCD fragmentation set at 30V, using the dual stage linear ion  
350 trap to generate up to 30 spectra per second.

351

## 352 Lipidomics data analysis

353 Acquired raw datafiles were converted to mzXML-files by msConvert (part of ProteoWizard  
354 v3.0.913) [30] and processed with R-package 'xcms' v2.99.3 [31]. After deisotoping,  
355 annotation of lipids was performed by matching measured MS-1 m/z values with theoretical  
356 m/z values. Lipids with the same or similar m/z values - *e.g.*, BMP(38:4) and PG(38:4) -  
357 could be distinguished by differences in retention time (**Fig. S3 and S4**). Lipid annotation  
358 containing individual fatty acids (extra column 'most abundant isomer annotation' in **Data**  
359 **S4**) as used in **Fig. 2 A** and **Fig. S3** was accomplished by examining MS-2 spectra. When  
360 MS-2 spectra were available for a given MS-1 peak, the most abundant fatty acid combination  
361 was used to annotate the lipid. The resulting experimental datasets, as well as the public RAW  
362 264.7 macrophage dataset [13], were normalized by expressing all lipids as ratios of the sum  
363 of all intensities per sample. MetaboAnalyst 3.0 [32] was used to replace missing values (of  
364 the RAW 264.7 dataset) by half of the minimum positive value in the original data, and to  
365 perform Principal Component Analysis (with Pareto scaling).

## 366 **Heat map, hierarchical cluster analysis and LION-enrichment analyses**

367 The heat map of the RAW 264.7 dataset was constructed after calculating z-scores for all  
368 lipids (all lipids were scaled to a mean of zero and a standard deviation of 1) using R-package  
369 ‘pheatmap v1.0.10’. Lipids were grouped by hierarchical clustering. The dendrogram of the  
370 lipids on the y-axis of the heatmap used Euclidean distance as the similarity measure and was  
371 performed with complete linkage. The number of clusters was set to 10. Enrichment analysis  
372 of each of the 10 clusters was performed using the ‘target-list mode’ with default settings.  
373 Enrichment analyses used in **Fig. 2 C** and **Fig. 3 A and D** were performed using the ‘ranking  
374 mode’, with one-tailed Welch two sample t-tests P-values as local statistics. The analysis for  
375 **Fig. 2 C** was performed with default settings, whereas LION-terms to be considered were  
376 limited to all child-terms of ‘contains fatty acid’ (CAT:0000100) for **Fig. 3 A** and all child-  
377 terms of ‘chain-melting transition temperature’ (CAT:0001734) and ‘lateral diffusion’  
378 (CAT:0080950) for **Fig. 3 D**.

## 380 **Software and R-packages**

381 All R-scripts were run with RStudio v1.0.153 (R v3.4.4) with the following packages: ‘shiny  
382 v1.1.1’, ‘visNetwork v2.0.1’, ‘data.table v1.10.4-2’, ‘GMD v0.3.3’, ‘igraph v1.0.1’, ‘reshape2  
383 v1.4.2’, ‘ggplot2 v2.2.1’, ‘ggthemes v3.4.0’, ‘shinyTree v0.2.2’, ‘shinyWidgets v0.4.1’,  
384 ‘shinythemes v1.1.1’, ‘RSQLite v2.1.1’, ‘topOnto v0.99.0’, ‘pheatmap v1.0.10’ and ‘xcms  
385 v2.99.3’ [31]. Perl-scripts provided with the topOnto package were run with Perl v5.26.0. All  
386 figures were built in R and processed in Cytoscape v3.5.1 or Inkscape v0.92.2.

## 387 **Data and code availability**

388 The LION database (OBO-format) and raw lipidomics data are available as Supplementary  
389 Data. The public RAW 264.7 macrophages dataset [13] is available on the journal’s website  
390 (<http://www.jlr.org/content/suppl/2010/06/23/jlr.M008748.DC1/jlr.M008748-1.xls>). R-  
391 package ‘topOnto’ is available at <https://github.com/hxin/topOnto>, the associated R-package

1  
2  
3  
4  
5  
6  
7  
8  
9  
10  
11  
12  
13  
14  
15  
16  
17  
18  
19  
20  
21  
22  
23  
24  
25  
26  
27  
28  
29  
30  
31  
32  
33  
34  
35  
36  
37  
38  
39  
40  
41  
42  
43  
44  
45  
46  
47  
48  
49  
50  
51  
52  
53  
54  
55  
56  
57  
58  
59  
60  
61  
62  
63  
64  
65

392 containing the LION database in topOnto-friendly format at  
393 <https://github.com/martijnmolenaar/topOnto.LION2.db>. The source code of the web-tool is  
394 available via github; Project name: LION-web; Project home page:  
395 <https://github.com/martijnmolenaar/LION-web/> ; Operating system(s): platform independent;  
396 Programming language: R; License: GNU General Public License v3.0

397

398

### 399 **ACKNOWLEDGEMENTS**

400 We thank Xin He, PhD, for providing and supporting the topONTO R-package. We thank  
401 Jeroen W.A. Jansen for the excellent technical assistance with the lipidomics experiments.

402

### 403 **AUTHOR CONTRIBUTIONS**

404 M.R.M. and J.B.H. conceived the project. M.R.M. developed LION, LION/web and  
405 performed the experiments. A.J. tested and suggested improvements for LION/web.  
406 C.H.A.v.d.L. and T.A.W. contributed to the regression models and statistical concepts.  
407 C.H.A.v.d.L. and J.F.B. contributed to the lipidomics data processing and analysis. M.R.M.  
408 and J.B.H. wrote the manuscript.

409

### 410 **COMPETING FINANCIAL INTERESTS**

411 The authors declare no competing financial interests.

412

### 413 **ADDITIONAL MATERIAL**

414 **Figure S1.** LION-terms associated with PS(34:2).

415 **Figure S2.** Model validations of biophysical properties in LION.

1  
2  
3  
4  
5  
6  
7  
8  
9  
10  
11  
12  
13  
14  
15  
16  
17  
18  
19  
20  
21  
22  
23  
24  
25  
26  
27  
28  
29  
30  
31  
32  
33  
34  
35  
36  
37  
38  
39  
40  
41  
42  
43  
44  
45  
46  
47  
48  
49  
50  
51  
52  
53  
54  
55  
56  
57  
58  
59  
60  
61  
62  
63  
64  
65

416 **Figure S3.** Lipidomics of CHO-k1 cells incubated with free fatty acids.

417 **Figure S4.** Lipidomics of CHO-k1 cells incubated with arachidonic acid (AA).

418 **Supplementary Data 1. XLSX-file containing all LION-terms excluding lipids with**  
419 **classification rules and sources.**

420 **Supplementary Data 2. CSV-file containing all lipids present in LION.**

421 **Supplementary Data 3. CSV-file with lipid clusters.**

422 **Supplementary Data 4. CSV-file with lipidomics dataset supporting Figure 2D.**

423 **Supplementary Data 5. CSV-file with LION/web output values supporting Figure 2D.**

424 **Supplementary Data 6. CSV-file with lipidomics dataset supporting Figure 2A.**

425 **Supplementary Data 7. CSV-file with LION/web output values supporting Figure 2A.**

426 **Supplementary Data 8. XLSX-file containing the coefficients of the biophysical models.**

427 **Supplementary Data 9. CSV-file with test-set for lipid names conversion.**

428 **Supplementary File 1.** LION-database in OBO-format.

429

## 430 **ABBREVIATIONS**

431 LION: lipid ontology; CG-MD: coarse-grain molecular dynamics simulation; LOOCV: leave-  
432 one-out cross-validations; GO: gene ontology; PUFA: polyunsaturated fatty acid; PA: palmitic  
433 acid; LA: linoleic acid; AA: arachidonic acid; BSA: bovine serum albumin; LC-MS/MS:  
434 liquid chromatography – tandem mass spectrometry; PDA: pyrene decanoic acid; CSV:  
435 comma separated values

436

437

438 **REFERENCES**

- 1  
2 439 [1] M. Ashburner, C. A. Ball, J. A. Blake, D. Botstein, H. Butler, J. M. Cherry, A. P. Davis,  
3  
4 440 K. Dolinski, S. S. Dwight, J. T. Eppig, M. A. Harris, D. P. Hill, L. Issel-Tarver, A.  
5  
6 441 Kasarskis, S. Lewis, J. C. Matese, J. E. Richardson, M. Ringwald, G. M. Rubin, and G.  
7  
8 442 Sherlock, “Gene ontology: tool for the unification of biology. The Gene Ontology  
9  
10 Consortium,” *Nat. Genet.*, vol. 25, no. 1, pp. 25–9, May 2000.  
11 443  
12  
13 444 [2] K. Degtyarenko, P. de Matos, M. Ennis, J. Hastings, M. Zbinden, A. McNaught, R.  
14  
15 445 Alcántara, M. Darsow, M. Guedj, and M. Ashburner, “ChEBI: a database and ontology  
16  
17 446 for chemical entities of biological interest,” *Nucleic Acids Res.*, vol. 36, no. Database  
18  
19 447 issue, pp. D344-50, Jan. 2008.  
20  
21  
22 448 [3] H. J. Sharpe, T. J. Stevens, and S. Munro, “A comprehensive comparison of  
23  
24 449 transmembrane domains reveals organelle-specific properties,” *Cell*, vol. 142, no. 1,  
25  
26 450 pp. 158–69, Jul. 2010.  
27  
28  
29 451 [4] M. E. Inda, M. Vandenbranden, A. Fernández, D. de Mendoza, J.-M. Ruyschaert, and  
30  
31 452 L. E. Cybulski, “A lipid-mediated conformational switch modulates the thermosensing  
32  
33 453 activity of DesK,” *Proc. Natl. Acad. Sci. U. S. A.*, vol. 111, no. 9, pp. 3579–84, Mar.  
34  
35 454 2014.  
36  
37  
38 455 [5] E. Sezgin, I. Levental, S. Mayor, and C. Eggeling, “The mystery of membrane  
39  
40 456 organization: composition, regulation and roles of lipid rafts,” *Nat. Rev. Mol. Cell Biol.*,  
41  
42 457 vol. 18, no. 6, pp. 361–374, Mar. 2017.  
43  
44  
45 458 [6] K. Ben M’barek, D. Ajjaji, A. Chorlay, S. Vanni, L. Forêt, and A. R. Thiam, “ER  
46  
47 459 Membrane Phospholipids and Surface Tension Control Cellular Lipid Droplet  
48  
49 460 Formation,” *Dev. Cell*, vol. 41, no. 6, p. 591–604.e7, Jun. 2017.  
50  
51  
52 461 [7] A. R. Thiam, R. V Farese, and T. C. Walther, “The biophysics and cell biology of lipid  
53  
54 462 droplets,” *Nat. Rev. Mol. Cell Biol.*, vol. 14, no. 12, pp. 775–86, Dec. 2013.  
55  
56  
57 463 [8] J. Bigay, P. Gounon, S. Robineau, and B. Antonny, “Lipid packing sensed by ArfGAP1  
58  
59  
60  
61  
62  
63  
64  
65

- 1  
2  
3  
4  
5  
6  
7  
8  
9  
10  
11  
12  
13  
14  
15  
16  
17  
18  
19  
20  
21  
22  
23  
24  
25  
26  
27  
28  
29  
30  
31  
32  
33  
34  
35  
36  
37  
38  
39  
40  
41  
42  
43  
44  
45  
46  
47  
48  
49  
50  
51  
52  
53  
54  
55  
56  
57  
58  
59  
60  
61  
62  
63  
64  
65
- 464 couples COPI coat disassembly to membrane bilayer curvature.,” *Nature*, vol. 426, no.  
465 6966, pp. 563–6, Dec. 2003.
- 466 [9] G. Enkavi, H. Mikkolainen, B. GÜngör, E. Ikonen, and I. Vattulainen, “Concerted  
467 regulation of npc2 binding to endosomal/lysosomal membranes by  
468 bis(monoacylglycero)phosphate and sphingomyelin,” *PLOS Comput. Biol.*, vol. 13, no.  
469 10, p. e1005831, Oct. 2017.
- 470 [10] E. Fahy, S. Subramaniam, R. C. Murphy, M. Nishijima, C. R. H. Raetz, T. Shimizu, F.  
471 Spener, G. van Meer, M. J. O. Wakelam, and E. A. Dennis, “Update of the LIPID MAPS  
472 comprehensive classification system for lipids.,” *J. Lipid Res.*, vol. 50 Suppl, no.  
473 Supplement, pp. S9-14, Apr. 2009.
- 474 [11] D. Marsh, “Structural and thermodynamic determinants of chain-melting transition  
475 temperatures for phospholipid and glycolipids membranes.,” *Biochim. Biophys. Acta*,  
476 vol. 1798, no. 1, pp. 40–51, Jan. 2010.
- 477 [12] T. A. Wassenaar, H. I. Ingólfsson, R. A. Böckmann, D. P. Tieleman, and S. J. Marrink,  
478 “Computational lipidomics with insane: A versatile tool for generating custom  
479 membranes for molecular simulations,” *J. Chem. Theory Comput.*, vol. 11, no. 5, pp.  
480 2144–2155, May 2015.
- 481 [13] A. Y. Andreyev, E. Fahy, Z. Guan, S. Kelly, X. Li, J. G. McDonald, S. Milne, D. Myers,  
482 H. Park, A. Ryan, B. M. Thompson, E. Wang, Y. Zhao, H. A. Brown, A. H. Merrill, C.  
483 R. H. Raetz, D. W. Russell, S. Subramaniam, and E. A. Dennis, “Subcellular organelle  
484 lipidomics in TLR-4-activated macrophages.,” *J. Lipid Res.*, vol. 51, no. 9, pp. 2785–  
485 97, Sep. 2010.
- 486 [14] R. A. Haraszti, M.-C. Didiot, E. Sapp, J. Leszyk, S. A. Shaffer, H. E. Rockwell, F. Gao,  
487 N. R. Narain, M. DiFiglia, M. A. Kiebish, N. Aronin, and A. Khvorova, “High-  
488 resolution proteomic and lipidomic analysis of exosomes and microvesicles from  
489 different cell sources,” *J. Extracell. Vesicles*, vol. 5, no. 1, p. 32570, Jan. 2016.

- 1  
2  
3  
4  
5  
6  
7  
8  
9  
10  
11  
12  
13  
14  
15  
16  
17  
18  
19  
20  
21  
22  
23  
24  
25  
26  
27  
28  
29  
30  
31  
32  
33  
34  
35  
36  
37  
38  
39  
40  
41  
42  
43  
44  
45  
46  
47  
48  
49  
50  
51  
52  
53  
54  
55  
56  
57  
58  
59  
60  
61  
62  
63  
64  
65
- 490 [15] M. S. Köberlin, B. Snijder, L. X. Heinz, C. L. Baumann, A. Fauster, G. I. Vladimer, A.  
491 C. Gavin, and G. Superti-Furga, “A Conserved Circular Network of Coregulated Lipids  
492 Modulates Innate Immune Responses,” *Cell*, vol. 162, no. 1, pp. 170–183, Jul. 2015.
- 493 [16] L. Lin, Y. Ding, Y. Wang, Z. Wang, X. Yin, G. Yan, L. Zhang, P. Yang, and H. Shen,  
494 “Functional lipidomics: Palmitic acid impairs hepatocellular carcinoma development by  
495 modulating membrane fluidity and glucose metabolism.,” *Hepatology*, vol. 66, no. 2,  
496 pp. 432–448, Aug. 2017.
- 497 [17] A. Alexa and J. Rahnenfuhrer, “Gene set enrichment analysis with topGO,”  
498 *Bioconductor*, 2017.
- 499 [18] W. T. Barry, A. B. Nobel, and F. A. Wright, “Significance analysis of functional  
500 categories in gene expression studies: a structured permutation approach.,”  
501 *Bioinformatics*, vol. 21, no. 9, pp. 1943–9, May 2005.
- 502 [19] J. C. M. Holthuis and A. K. Menon, “Lipid landscapes and pipelines in membrane  
503 homeostasis.,” *Nature*, vol. 510, no. 7503, pp. 48–57, Jun. 2014.
- 504 [20] G. van Meer, D. R. Voelker, and G. W. Feigenson, “Membrane lipids: where they are  
505 and how they behave.,” *Nat. Rev. Mol. Cell Biol.*, vol. 9, no. 2, pp. 112–24, Feb. 2008.
- 506 [21] P. C. Calder, “Marine omega-3 fatty acids and inflammatory processes: Effects,  
507 mechanisms and clinical relevance.,” *Biochim. Biophys. Acta*, vol. 1851, no. 4, pp. 469–  
508 84, Apr. 2015.
- 509 [22] X. Yang, W. Sheng, G. Y. Sun, and J. C. M. Lee, “Effects of fatty acid unsaturation  
510 numbers on membrane fluidity and  $\alpha$ -secretase-dependent amyloid precursor protein  
511 processing.,” *Neurochem. Int.*, vol. 58, no. 3, pp. 321–9, Feb. 2011.
- 512 [23] J. Eisinger and S. F. Scarlata, “The lateral fluidity of erythrocyte membranes  
513 temperature and pressure dependence,” *Biophys. Chem.*, vol. 28, no. 3, pp. 273–281,  
514 Dec. 1987.
- 515 [24] D. Schwudke, A. Shevchenko, N. Hoffmann, and R. Ahrends, “Lipidomics informatics

516 for life-science,” *J. Biotechnol.*, vol. 261, pp. 131–136, Nov. 2017.

517 [25] L. Aimo, R. Liechti, N. Hyka-Nouspikel, A. Niknejad, A. Gleizes, L. Götz, D.  
518 Kuznetsov, F. P. A. David, F. G. van der Goot, H. Riezman, L. Bougueleret, I. Xenarios,  
519 and A. Bridge, “The SwissLipids knowledgebase for lipid biology.,” *Bioinformatics*,  
520 vol. 31, no. 17, pp. 2860–6, Sep. 2015.

521 [26] A. I. P. M. de Kroon, P. J. Rijken, and C. H. De Smet, “Checks and balances in membrane  
522 phospholipid class and acyl chain homeostasis, the yeast perspective.,” *Prog. Lipid Res.*,  
523 vol. 52, no. 4, pp. 374–94, Oct. 2013.

524 [27] S. J. Marrink, A. H. de Vries, and A. E. Mark, “Coarse Grained Model for  
525 Semiquantitative Lipid Simulations,” *J. Phys. Chem. B*, vol. 108, no. 2, pp. 750–760,  
526 2004.

527 [28] T. Wächter and M. Schroeder, “Semi-automated ontology generation within OBO-  
528 Edit.,” *Bioinformatics*, vol. 26, no. 12, pp. i88-96, Jun. 2010.

529 [29] E. G. Bligh and W. J. Dyer, “A rapid method of total lipid extraction and purification,”  
530 *Can. J. Biochem. Physiol.*, vol. 37, no. 8, pp. 911–917, Aug. 1959.

531 [30] R. Adusumilli and P. Mallick, “Data Conversion with ProteoWizard msConvert.,”  
532 *Methods Mol. Biol.*, vol. 1550, pp. 339–368, 2017.

533 [31] C. A. Smith, E. J. Want, G. O’Maille, R. Abagyan, and G. Siuzdak, “XCMS: processing  
534 mass spectrometry data for metabolite profiling using nonlinear peak alignment,  
535 matching, and identification.,” *Anal. Chem.*, vol. 78, no. 3, pp. 779–87, Feb. 2006.

536 [32] J. Xia, I. V. Sinelnikov, B. Han, and D. S. Wishart, “MetaboAnalyst 3.0--making  
537 metabolomics more meaningful.,” *Nucleic Acids Res.*, vol. 43, no. W1, pp. W251-7, Jul.  
538 2015.

540 **FIGURE LEGENDS**



1  
2  
3  
4  
5  
6  
7  
8  
9  
10  
11  
12  
13  
14  
15  
16  
17  
18  
19  
20  
21  
22  
23  
24  
25  
26  
27  
28  
29  
30  
31  
32  
33  
34  
35  
36  
37  
38  
39  
40  
41  
42  
43  
44  
45  
46  
47  
48  
49  
50  
51  
52  
53  
54  
55  
56  
57  
58  
59  
60  
61  
62  
63  
64  
65

541 **Figure 1. Enrichment analysis approaches supported by LION/web.** A lipidomics dataset  
542 containing lipid identifiers and abundances derived from two or more conditions (1) can be  
543 processed by LION/web in two ways. In the ‘target-list mode’ (left, 2), a subset of lipids  
544 (*e.g.*, derived from thresholding or clustering) is compared to the total set of lipids. After  
545 standardization of lipid nomenclature (3), applicable LION-terms are associated and assessed  
546 for enrichment in the subset by Fisher’s exact statistics. In the ‘ranking mode’, input lipids are  
547 ranked by numeric values (‘local’ statistics) (2). After ranking, lipid nomenclature is  
548 standardized (3). Applicable LION-terms are subsequently associated to the dataset and  
549 distributions are compared to a uniform distribution by ‘global’ statistics (here, Kolmogorov–  
550 Smirnov tests). Calculated *P* values of LION-terms from both modes are corrected for  
551 multiple testing (Benjamini-Hochberg).

552  
553 **Figure 2. LION-term enrichment analysis of RAW 264.7 macrophages.** (A) Heatmap of  
554 scaled lipid amounts (*z*-score < 0: blue, *z*-score > 0: red) of subcellular lipidomics data [13]  
555 with samples on the x-axis and individual lipid species on the y-axis. Lipids were clustered  
556 into 10 groups by hierarchical clustering. (B) Enrichment analyses of all lipid clusters in the  
557 ‘target-list mode’. For each cluster, the first *n* + 2 significant LION-terms are shown. (C)  
558 Enrichment analysis of PM vs. ER fractions in the ‘ranking mode’. The gray vertical lines  
559 indicate the cut-off value of significant enrichments (*q* < 0.05). Bar colors are scaled with the  
560 enrichment (-log *q*-values).

1  
2  
3  
4  
5  
6  
7  
8  
9  
10  
11  
12  
13  
14  
15  
16  
17  
18  
19  
20  
21  
22  
23  
24  
25  
26  
27  
28  
29  
30  
31  
32  
33  
34  
35  
36  
37  
38  
39  
40  
41  
42  
43  
44  
45  
46  
47  
48  
49  
50  
51  
52  
53  
54  
55  
56  
57  
58

**Figure 3. LION-term enrichment and membrane fluidity of CHO-k1 cells.** CHO-k1 cells were incubated overnight with PA, LA or AA (100  $\mu$ M) (**A**) or with AA (250  $\mu$ M) (**B-D**). All incubations were performed in triplicate. For control incubations, cells were incubated with fatty-acid free BSA. (**A,D**) After extraction and lipidomics profiling by LC-MS/MS, enrichment analyses of the conditions of interest versus control incubations were performed by LION/web of (**A**) LION-terms indicating the presence of selected fatty acids or (**D**) LION-terms indicating the degree of membrane fluidity. Dot sizes in the dot plots are scaled to the number of associated lipids; colors are scaled to the level of enrichment (-log  $q$ -values). (**B,C**) After incubation, fluorescence emission spectra of lysates containing pyrenedecanoic acid (PDA) were measured (**B**). Fluorescence spectra examples of either control (black) or AA-stimulated lysates (red). Gray shades indicate monomer and excimer fluorescence filters. (**C**) Mean ratios (bar) and individual datapoints (dots) of excimer over monomer fluorescence (representative data of three independent experiments). Statistical significance was determined by Student's two-tailed t-test. (**A,C,D**) \*  $P$  or  $q < 0.05$ , \*\*  $P$  or  $q < 0.01$ , \*\*\*  $P$  or  $q < 0.001$ .

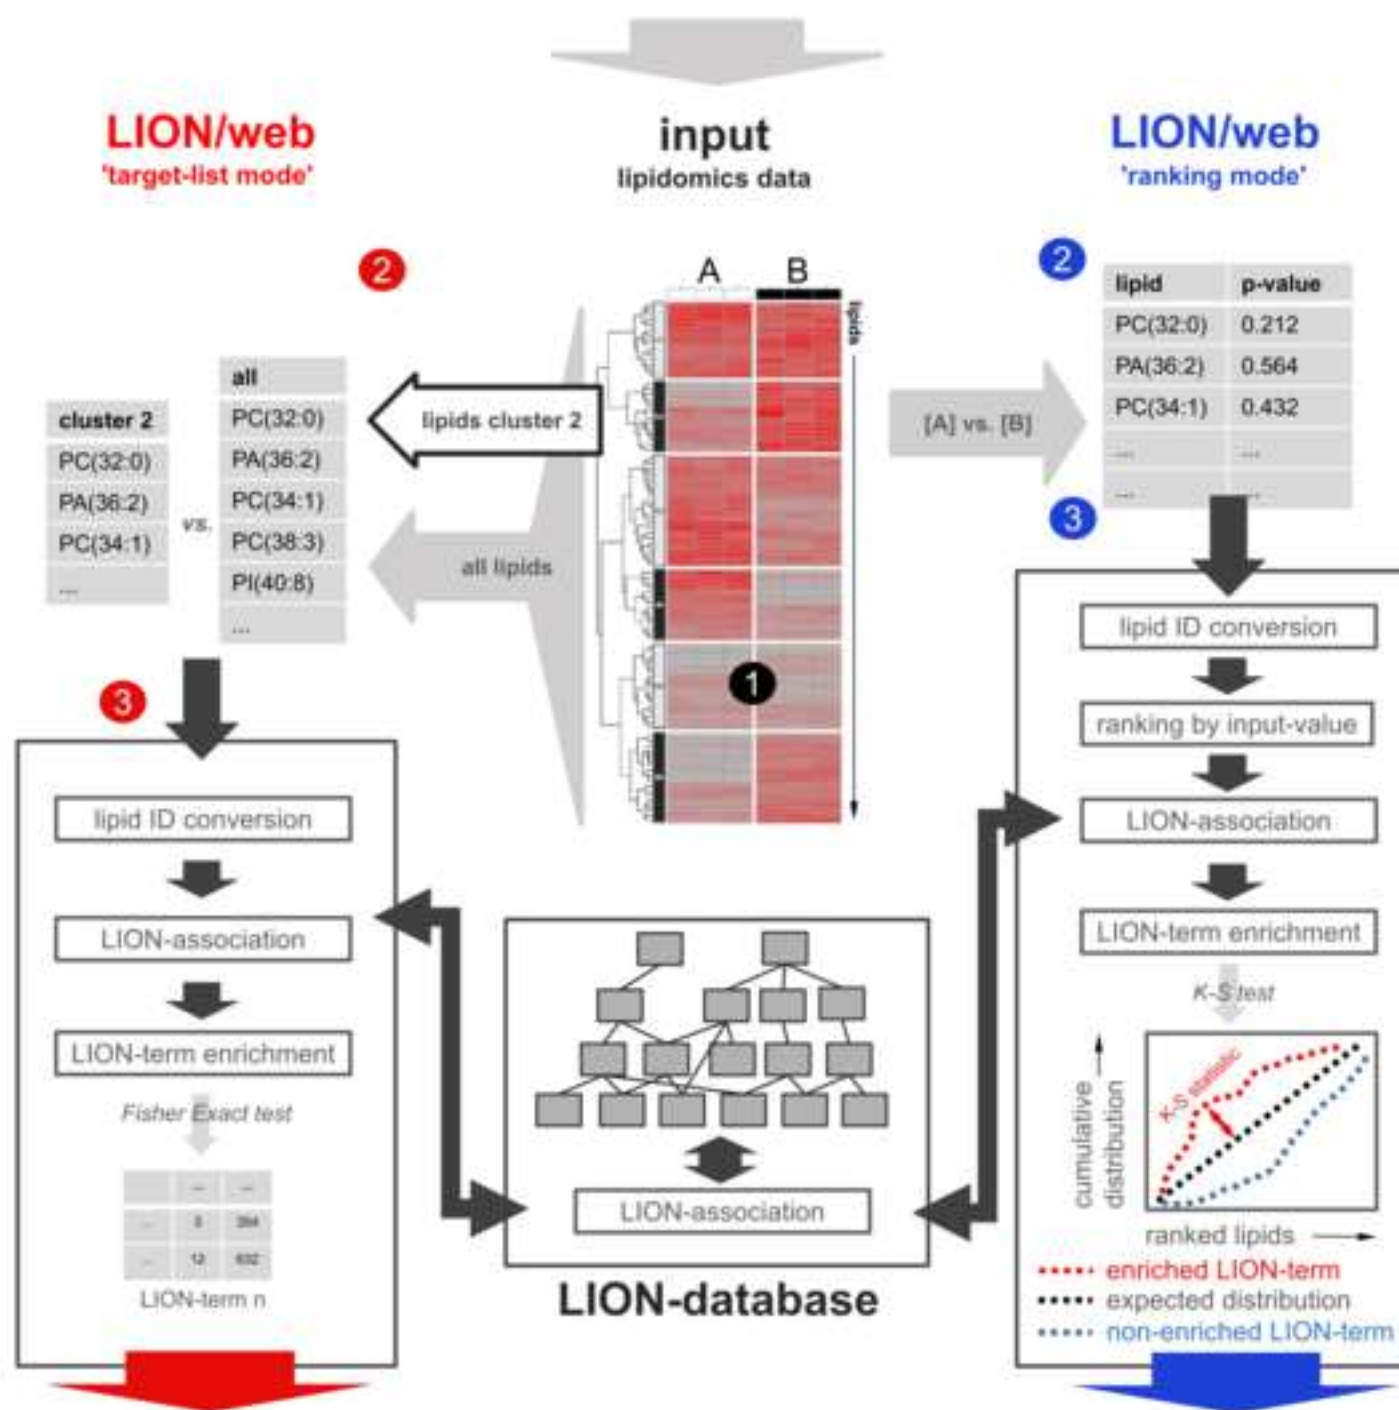

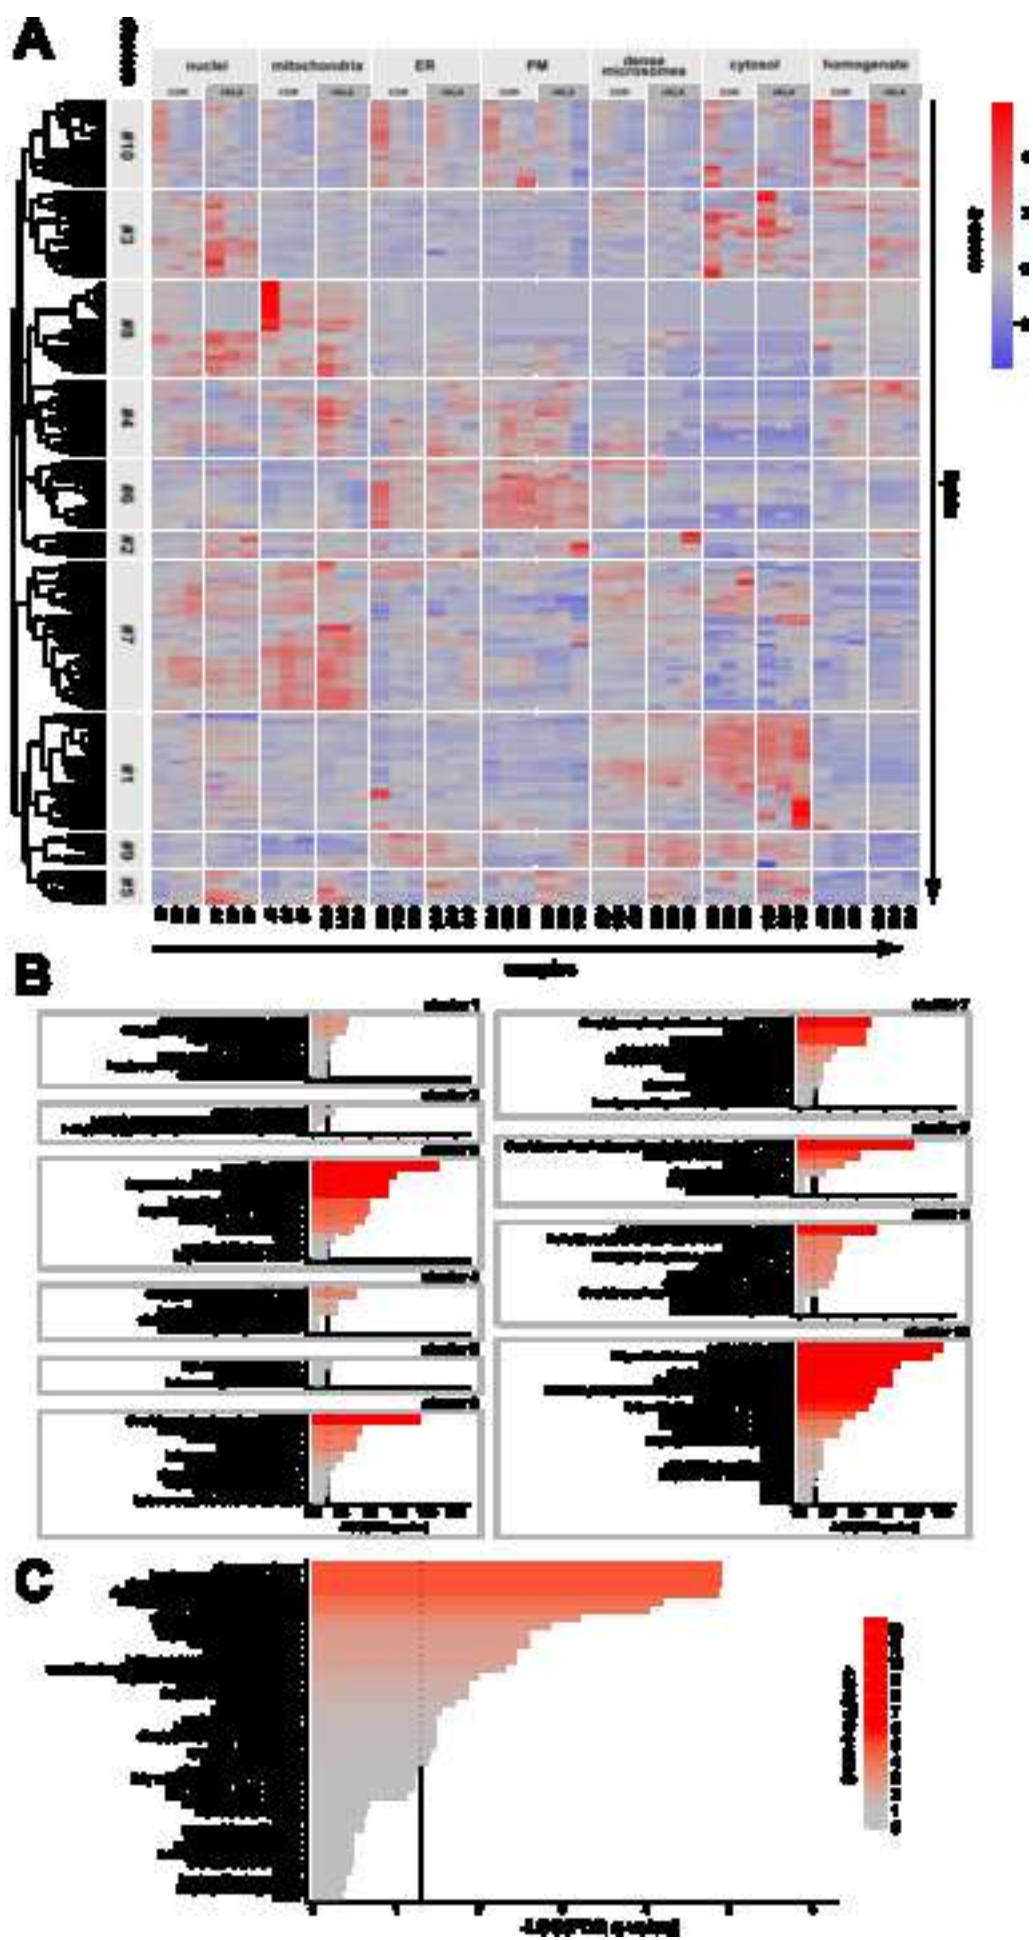

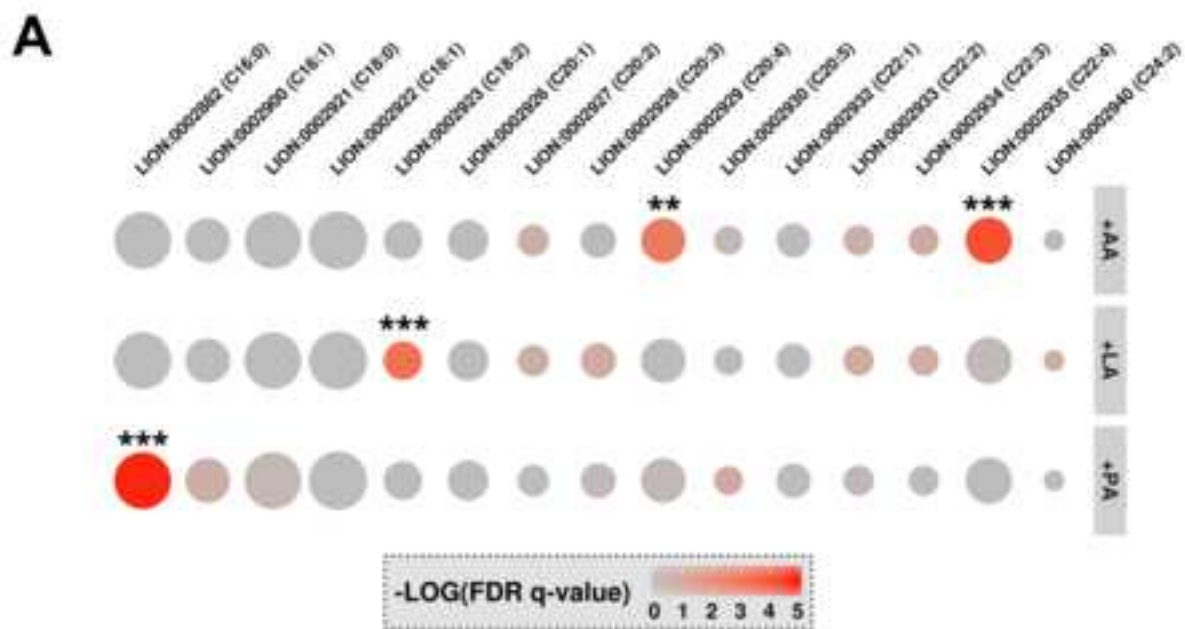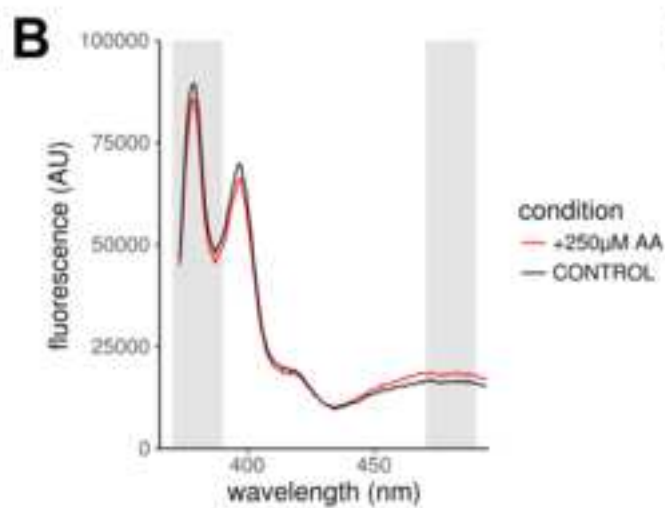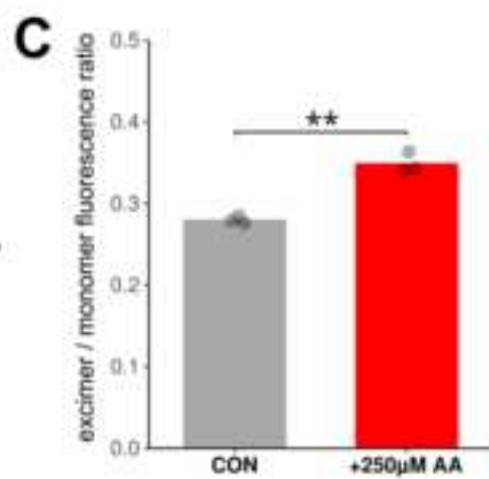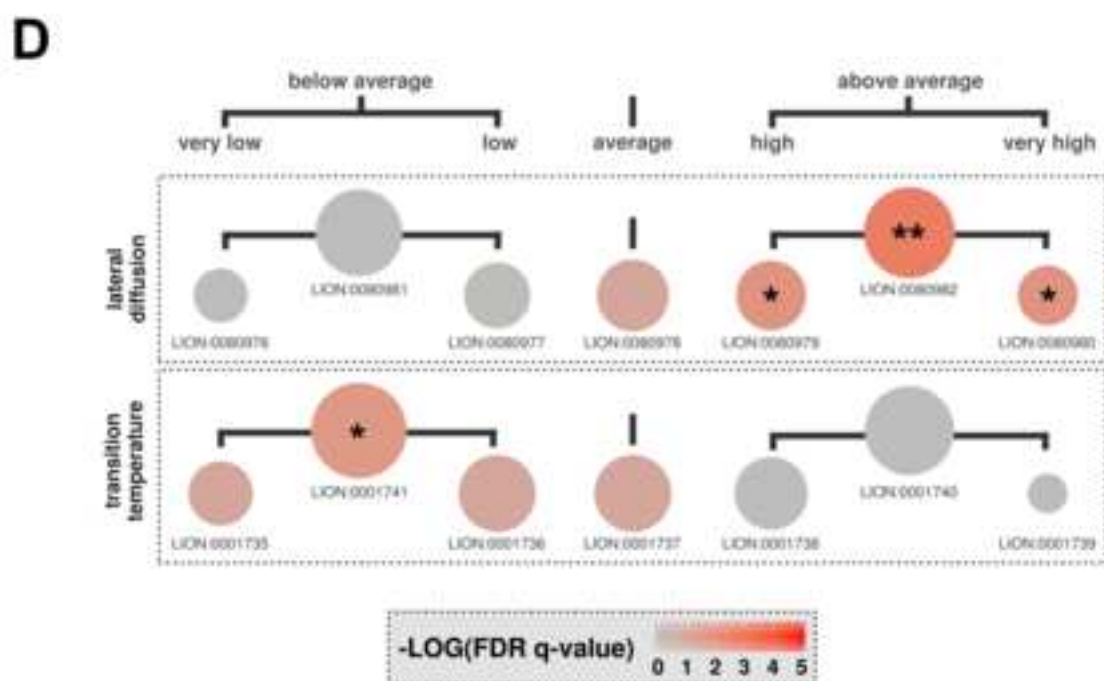



Click here to access/download  
**Supplementary Material**  
Figure S3.png

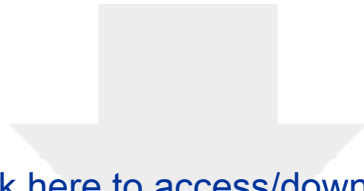

[Click here to access/download](#)

**Supplementary Material**

20190226 LION Supplement\_after review final.docx

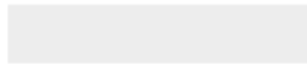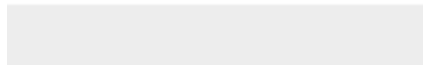

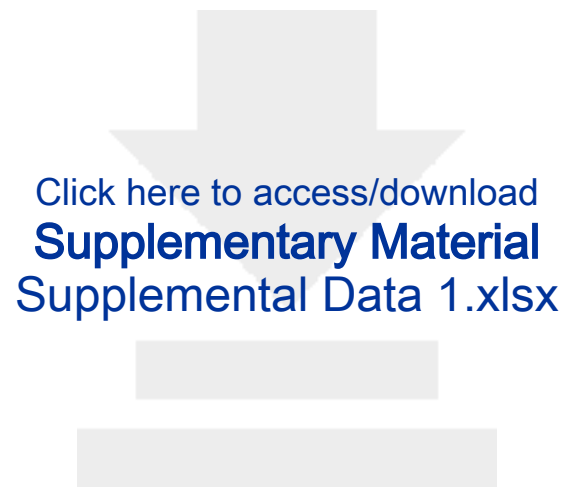

Click here to access/download  
**Supplementary Material**  
Supplemental Data 1.xlsx



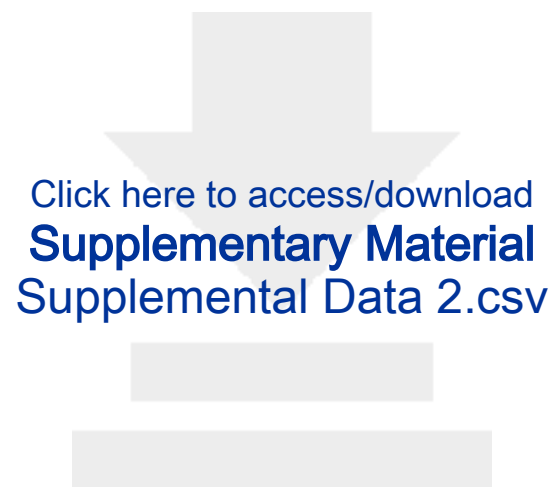

Click here to access/download  
**Supplementary Material**  
Supplemental Data 2.csv

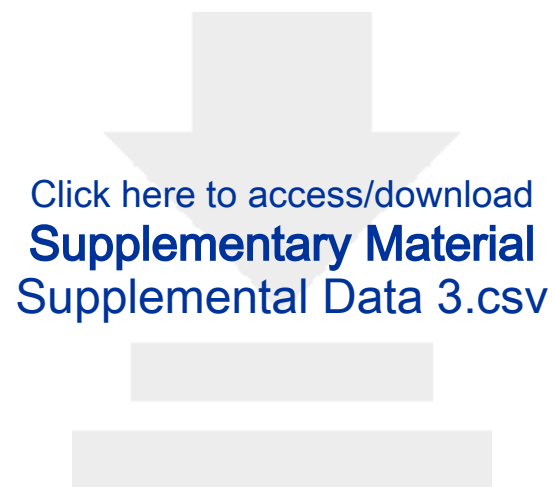

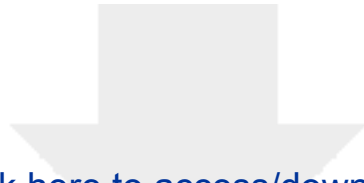

Click here to access/download  
**Supplementary Material**  
Supplemental Data 4.csv

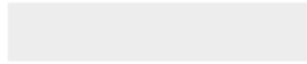



Click here to access/download  
**Supplementary Material**  
Supplemental Data 5.csv

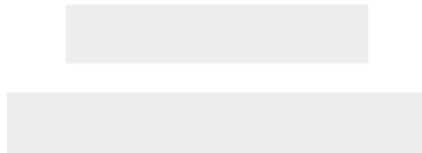

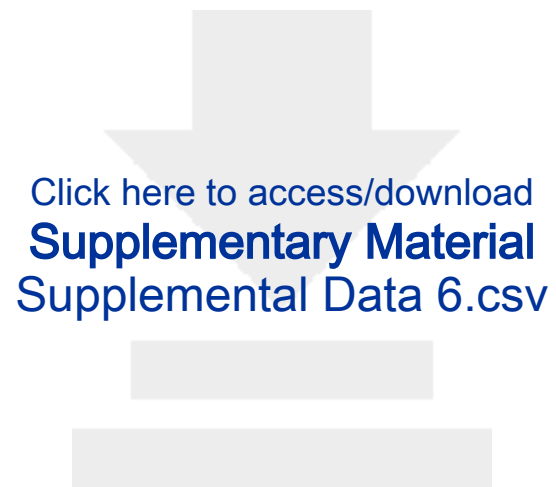

Click here to access/download  
**Supplementary Material**  
Supplemental Data 6.csv



Click here to access/download  
**Supplementary Material**  
Supplemental Data 7.csv

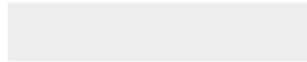

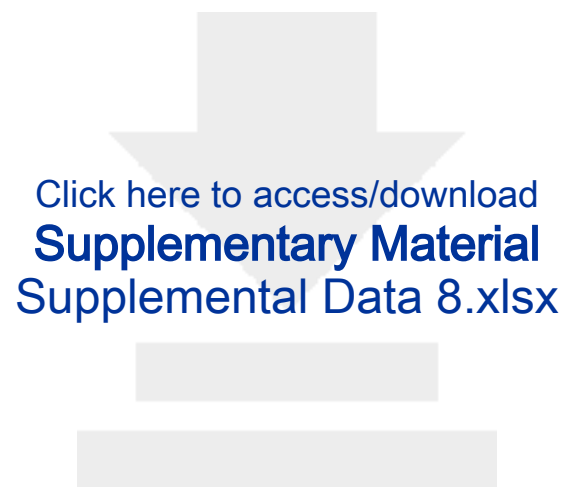

Click here to access/download  
**Supplementary Material**  
Supplemental Data 8.xlsx



Click here to access/download  
**Supplementary Material**  
Supplemental Data 9.csv





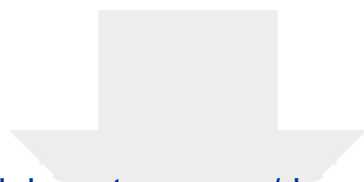

Click here to access/download  
**Supplementary Material**  
Supplemental File 1 LION.obo

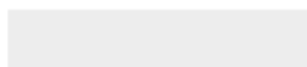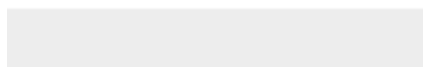

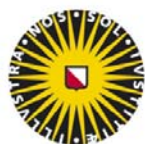

**Universiteit Utrecht**

***GigaScience***

**The Editor**

Nicole Nogoy, Ph.D

Faculty of Veterinary Medicine  
Department of Biochemistry  
and Cell Biology  
PO Box 80176  
3508 TD Utrecht  
The Netherlands  
Tel: +31-30-2535375  
Fax: +31-30-2535492  
Email: j.b.helms@uu.nl

February 27, 2019

Dear Nicole Nogoy,

Please find enclosed our revised manuscript GIGA-D-18-00357 entitled  
“LION/web: a web-based ontology enrichment tool for lipidomic data analysis” by  
Martijn Molenaar et al. that we would like to resubmit for publication in your  
journal GigaScience.

Attached you will find a Point-by-Point answer to the comments made by the  
reviewers. We have also included a revised version of the manuscript with the  
changes highlighted. Most important changes include the incorporation of an  
additional figure to illustrate the ‘target-list mode’ and a strong improvement of  
the description and explanation of the database and webtool.

We thank the reviewers for their helpful comments that have helped to improve  
the quality of this manuscript.

We hope you find the manuscript now suitable for publication in GigaScience.

With kind regards



Prof. Dr. J.B. Helms

**Ruth Welti (Reviewer 1)**

*LION provides useful information helping users associate lipidomics data on membrane lipid species from mammalian systems with the chemical and physical properties of those systems. Overall this is an ambitious undertaking that is likely to provide insights on lipid properties, particularly to users that are not familiar with chemical or physical properties of membrane lipids. Overall, the tool seems useful and the paper is well-written, but a few points could be explained in more detail.*

We appreciate the positive and constructive comments of the reviewer.

*#1. It should be mentioned, and perhaps the authors could include an explanatory note at the site, noting that actual physical properties of membranes (such as fluidity) depend on factors in addition to the typically measured lipids, including sterols and protein type and content.*

We incorporated a statement about this aspect at three different locations: i) in the web-tool (on the '?' sign, beneath the results output); ii) in a new F.A.Q. that is now available via the website; and iii) in the Discussion (line 200-204).

*#2. It might be useful to point out specifically that the samples chosen to "calibrate" the lipid categorization are all from mammalian cells and thus the ability to accurately interpret lipidomics data from other types of systems is not clear. Perhaps this is because it is not clear to the reviewer precisely how the categorized lipids (page 4, lines 69-74) were used in the analysis. Since many mammalian tissues (e.g. brain, heart) have more extreme compositions, will this be a problem for analysis?*

Indeed, we made use of mammalian lipidomics datasets as reference to define the groups of three biophysical properties. To emphasize this, we included a comment on LION's focus on mammalian lipidomes in the Discussion (line 193-197). This will, however, not compromise the results in specific examples as mentioned by the reviewer as the principle of LION/Web is based on sample comparison (Fig.1, sample A and B). A comparison between tissues with more extreme compositions (e.g. brain and liver) is likely to result in enriched terms related to very low  $T_m$ 's or very high lateral diffusions, and in different lipid classes/species, results that reflect the respective lipidomes. Comparison between samples from the same tissue ( e.g. wt brain vs. geneX<sup>-/-</sup> brain) will often yield more subtle differences, depending on the knockout. However, LION/Web will report any significant difference, e.g. if geneX affects lipid composition. The statistical power of the significance can be further increased by increasing the number of replicates (n).

*#3. The ranking approach appears to be a pairwise comparison. I.e., even when multiple samples are present, comparison is to one (control) sample. This is analogous to a typical transcriptomic approach but, given that it's actually easier to collect lipidomic data than transcriptomic data on hundreds of samples/conditions, having to analyze the data pairwise might be a bit burdensome. Maybe you could discuss the choice of approach in the paper or clarify if the reviewer's understanding is incorrect.*

We thank the reviewer for this comment. We have extended the web-tool with more options to calculate local statistics (values that are used to rank lipids). One of these options is the use of p-values derived from one-way ANOVA F-tests. This statistic analysis allows comparison of multiple conditions and can be used to rank the most fluctuating lipid species in datasets. Subsequent enrichment analysis will result in LION-terms summarizing these lipids.

A second option that we included to characterize lipidomic datasets with more than 2 conditions, is the use of hierarchical clustering in combination with the target-list mode. A new figure (Figure 2B)

illustrates this approach using the same public dataset that we used in the initial version of the manuscript. Enrichment analysis of the lipids in the clusters, in combination with a visual presentation of the clusters in relation to the conditions, further aids in characterization of the full dataset.

*#4. An example showing the output from the target mode would be helpful to the reader.*

We agree with the reviewer that the manuscript would benefit from an example of the target mode. As mentioned above (#3) we now include a new figure (Figure 2B) that shows a clustered heat map of the RAW 264.7 macrophages dataset. Each cluster is characterized by assessing LION-term enrichment of the lipids within each cluster, as compared to all the lipids in the experiment.

## Aleksander Andreyev (Reviewer 2)

*This technical note describes a Lipid-related ONtology database (LION) and accompanying enrichment analysis tool with potentially high value for lipidomics research. According to the authors they aim to "bridge<> the gap between lipidomics and cell biology" (p.7, l.138). A mere attempt at this herculean task is highly commendable. This entails, however, that the narration should be comprehensible for a non-expert user, presumably a cell biologist with little understanding of bioinformatics (which would be also in line with the GigaScience editorial guidelines). Unfortunately, the manuscript is plagued with multiple issues that make it very hard to understand the utility and intended use of the tools and nearly impossible to evaluate their validity. From the way manuscript is written, it feels as if it is intended more for bioinformatics audience which almost defeats the purpose. It is also somewhat disorganized with the logical flow being interrupted by off-hand remarks and description of one topic spread over different parts of the manuscript, sometimes repetitively. In a few cases, the text is burdened with statements of the obvious (e.g., "lipid structure is closely related to lipid function", "allows identification of lipid-associated terms in lipidomes"). There are multiple typos, grammar errors and misused words or terms that make a mere reading of the article a torture. One step to address this issues might be including subsections under the Findings section, another - careful reassessment of what material represents technical side and belongs to Methods and what should be in the Findings (my feeling is that a good portion of the LION description, currently under Methods, actually belongs to the Findings, right after the background information). The same goes to figure legends - I think currently they are overloaded with information that belongs in the Methods. The manuscript suffers from frequent use of vague statements. Instead of describing WHAT was done the authors simply state the means for doing it: "we used" this or that, "we made use of" this or that, such and such "was used", etc. Instead of explaining HOW something was done a bare statement "based on" is often made. References are missing (e.g., "as described in the literature", p.4, l.53, "was reported", p.5, l.99). The tally of connections between membrane biophysics and cell biology (p.3, l.35-43) looks random and lacking completeness. Besides, it seems somewhat misplaced. Authors use what appears to be in-house or jargon terms, such as "by target list", "by ranking" for the modes of the enrichment analysis, "local" statistics, etc. Use of such terms should be avoided. For such important terms as the modes of analysis the names should be related to their function and, ideally, self- explanatory (or, at least, thoroughly explained). All these issues pertaining to the quality of the narration should be addressed before the substance of the work can be properly evaluated.*

We thank reviewer #2 for his thorough review report and would like to apologize for the typos and grammar errors in the manuscript that made 'reading of the article a torture'. As suggested, the Findings section is now subdivided into subsections with headings. We also include a separate Discussion section to avoid the 'interruption by off-hand remarks'.

Indeed, LION/web is intended to be useful for non-experts in bioinformatics. We recognize that some concepts used in the manuscript might be difficult to grasp with limited bioinformatics experience. Nevertheless, some basic understanding of data-analysis must be expected from users that obtained omics-data (which is obviously a prerequisite to use LION/web). In the updated version, we have provided more explanation and illustrate some of the concepts with examples in the following ways:

- i) throughout the manuscript, we added additional information.
- ii) we added a point-by-point frequently asked question (F.A.Q.) section in the web-tool, that can be accessed via the main menu of the website.

iii) we added 'tooltips' in the LION/Web application. Tooltips are pieces of information or instructions that appear when users hover the mouse cursor over an item - without clicking on it. This allows for specific instructions for specific steps.

Upon the reviewer's request, we have considered several alternative names for the enrichment modes (ranking and target-list mode). However, we found the initial names to be the clearest, as it describes the difference between the modes the best. The use of a target-list (usually referred to as gene list, ID list, etc.) is also common practise in gene ontology enrichment procedures (DAVID, Panther, GOrilla). Users who have experience in this field will recognize the concept 'target-list'. To improve the understanding of these terms/modes, we included more details about both modes in the Methods section. In addition, we added a new figure (Figure 2A+B) to illustrate the target-list mode.

With respect to the comment "*The tally of connections between membrane biophysics and cell biology (p.3, l.35-43) looks random and lacking completeness*" we note that the listing of biophysical properties related to membrane biology in the background section was not intended to be complete, but to provide a few intuitive examples. To clarify this, we put these examples in parentheses and 'e.g.'.

Concerning missing references: Details about references per data source is now available via Supplemental Data 1. The statement 'was reported' (page-5/line-99 of initial manuscript) refers to LION-terms that were reported by the web-tool.

*However, even in the present state the manuscript allows to point out the following weaknesses/areas for improvement:*

*#1. The LION should be completely verbally described (beyond the present reference to the .obo file). This should include a list of categorical ontology terms and rules of association between them. For the ones that are not obvious, a justification should be provided. As it stands now, the terms in question are hidden inside 1275-page long Excel file among about 50,000 terms representing individual lipids. Some of them relate to conventional structural elements of lipids, others are less obvious. For example, "fatty acid with 16-18 carbons" - is there any scientific meaning in this term? What is so special about this particular chain length? What exactly are the extra levels of classification between lipid classes and species? - they are mentioned but not described.*

Upon the reviewer's request, we describe LION in a better structured way by inclusion of two additional tables:

(1) Supplemental Data 1; describing all LION-terms (excluding lipid species), with detailed information about hierarchy, classification and references.

(2) Supplemental Data 2; describing all lipid species present in LION.

Concerning the scientific meaning of terms: one of the guiding principles of LION was to be able to construct defined subsets of lipids ('terms'). LION/web then aids to report the most interesting subsets. Some of these subsets might be of interest, others might not. Scientific meaning should be evaluated by the scientist. For example, "fatty acid with 16-18 carbons" might indeed sound trivial at the first sight. Nevertheless, its enrichment could hint towards testable biological hypotheses.

*#2. The enrichment tool is the crux of the article, the thing the authors are trying to "sell". However, there is no description of what it does and how it can be used. I flatter myself to be a qualified user but I could not make a head or tail of what the so called "by target list" mode does. If my "target list" includes unsaturated lipids I'll get enrichment in "double bonds", "below average transition temperature", etc. That much is obvious without running the tool. What else? What are the scenarios*

*when I need to use it? Why do I need two lipidomic data sets for this? What does "derived from thresholding or clustering" mean?*

We recognize that in the initial version of the manuscript, the use of the 'target-list mode' was not illustrated. We added an extra figure (figure 2) that demonstrates the use of both modes using the RAW 264.7 macrophages dataset (figure 2A+B for the target-list, figure 2C for the ranking mode). Figure 2C was a supplemental figure in the original manuscript.

*The second mode, apart from the name (why "by ranking"? isn't this purely technical approach to facilitate stat analysis?), is less problematic. However, the option to limit analysis to a specific set of terms ("terms of interest") should be mentioned upfront. Then, the questions arise in what scenarios this would be advantageous? Would this create a bias in the analysis or not, both with regard to outcome and its stat significance?*

We now describe the selection of specific sets at an earlier stage.

*#3. The claim of the scope is overreaching. The "function" category, most interesting for cell biology researchers, appears to be extremely frugal, limited just to the crudest distinction between structural, signaling and storage functions. If this perception is correct, the LION would be of limited value for cell biology. The "chemical" properties appear to be a misnomer with chemical information limited purely to structural elements with no regard to reactivity, biochemical synthetic pathways, etc. I would say that, according to this Technical Note, the LION is the ontology linking lipidomics data to biophysical properties of corresponding membranes. The testing of the ontology was performed in a set of assays pertaining to membrane biophysics.*

We found a single occurrence of 'cell biology' ('...web-tool bridges the gap between lipidomics and cell biology...') in the initial manuscript. This claim is now phrased with greater caution by '... future expansions of the LION database..., LION/web will be increasingly successful to bridge the gap between lipidomics and cell biology.' (line 216-218). However, we believe that besides 'function', also 'cellular component' and the biophysical properties are of interest for scientists studying cell biology. In addition, we will maintain the LION database and update it when new lipid data and functions of individual lipid species or classes become available (see also our reply to the comment of the expert editorial board member).

*#4. It would be advantageous to sync terminology with other ontologies whenever possible, for example, use the GO term "cellular component" instead of "cellular localization", etc. "Lipid component" is a very dubious term for a structural lipid.*

As suggested, we replaced the LION-term name "cellular localization" by "cellular component". "Lipid component" was a typo in the manuscript, and not the name of a term in LION. We apologise for this mistake.

*#5. The biophysical properties of the vast majority of lipids were inferred from a limited set of literature data. It is therefore of utmost importance to thoroughly describe the approach used. What kind of data the sources provided? Where they for individual lipids or mixes, measured or calculated? How many entries? The equations for the multiple linear (sic!) regression analysis should be shown. The resulting coefficients could be of value by itself - why not publish them here?*

We thank the reviewer for noticing the missing word 'linear'. We replaced multiple occurrences of 'multiple regression analysis' by 'multiple linear regression analysis'.

As mentioned earlier, we now include a supplemental table with data sources per LION-term. The raw numeric values (per lipid) of the biophysical properties derived from these sources were already provided together with the original manuscript in 'scripts' folder. It is our understanding that this folder is available to the reviewers (and to the public after publication).

We appreciate the suggestion to report the coefficients of the models. To this end, we now include an Excel spreadsheet containing the coefficients of the models, together with input cells to predict (numerical) values of the biophysical properties (Suppl. Data 8).

*#6. The lipids appear to be divided into "quintiles" using a hard-to-describe (and almost lacking description in the manuscript) procedure based initially on a number of lipids in each group rather than the value of a biophysical parameter. What is the rationale for this? Does transition temperature of a lipid membrane care how many other membranes share the same value? I think the categorization should be based upon the magnitudes of biophysical properties alone. By the way, how many groups are actually there? The text says 5 but Fig. 2 shows 7... Also, Fig. 2 shows FDR q-values which are not mentioned in either legend or the main text.*

We categorized 'transition temperature' into 5 groups: very low, low, etc. These descriptions are not defined and intrinsically subjective: whether a membrane has a low  $T_m$  depends on the context. To provide this context, we selected four lipidomics studies to serve as reference. Lipids from these reference lipidomes were ranked based in the predicted numeric values of the biophysical property. Then, the first 20% (first quintile) was defined as 'very low', the second 20% (second quintile) as 'low', etc. The limits of these quintiles were then used to classify all lipids present in LION. We believe that this approach defines the group limits with more physiological relevance. The alternative approach, based on magnitudes of biophysical properties alone (as suggested by the reviewer) is more likely to yield a quintile 'average' for a group of non-physiological lipids.

The confusing of 5 groups vs. the 7 groups in figure 2 (now figure 3) is related to hierarchy. The groups 'very low ...' and 'low ...' are linked to a parental group called 'below average ...'. The same goes for 'high ...' and 'very high ...', they are linked to 'above average ...'. We updated the figure by adding a graphical representation of this hierarchy to the figure (new figure 3D). The hierarchy of LION-terms is also depicted in supplemental Data S1.

We now include a reference to 'q-values' in the figure legends.

*#7. It is not absolutely clear from the manuscript but appears that the enrichment tool relies on the significance of the changes (p-value), as opposed to magnitude, to evaluate enrichment. Is this true? Is it possible that highly significant changes in low abundance lipids would dominate the outcome list without having much effect on the properties of membrane?*

All enrichment analyses in the initial version of the manuscript used the ranking-mode with one-tailed t-test p-values to rank the lipids. Other statistical methods could be considered, but every choice has its pros and its cons. Magnitude (fold-change of condition B over condition A) has the undesirable property to overestimate effects when lipid concentrations are close to noise levels: it does not take sample variance into account. In contrast, p-values are more robust, but might be less intuitive to users without strong background in statistics. Using p-values, it is potentially possible that '*highly significant changes in low abundance lipids could dominate the outcome list*'. However, most low abundant lipids usually display higher variance due to lower signal/noise levels. As a result, they usually do not generate extreme low p-values.



To provide more flexibility for users and to make the choice of a local statistic explicit, we now offer three local statistics (one-tailed t-test p-values, <sup>2</sup>log fold-change, F-test p-values) in the updated version of the web-tool. The statistical method must be selected each time an analysis in the ranking mode is initiated.

*#8. More detail should be provided on the statistics, for example, how the distribution curve was generated for K-S analysis, what were the input parameters for the Fisher exact test, etc.*

We added more information in the Methods section.

*#9. Methods for PDA assay and LC-MS should be brought to compliance with editorial guidelines to allow duplicate these studies. Missing are parameters such as cell number, concentration of the dye, shape of LC gradient, LC system used, MS/MS settings, to name a few. The full name of the Fusion mass spec should be provided because there are several different models. The text is not clear on the sequence of events: it sounds as if analyte ions fly from orbitrap to linear ion trap for detection - is this even possible?*

We added details about the PDA in the manuscript.

The methods for LC-MS have now been described in greater detail to facilitate easy replication of experiments. Parallelization of MS1 and MS2 experiments has been clarified to avoid confusion. Current versions of the MS instrument are branded as 'Fusion Lumos' or 'Fusion IDX'. However, the original 'Orbitrap Fusion' mass spectrometer (serial number FSN10438) was branded under that name and this is the model used in our studies. Therefore, we cannot specify the type of instrument more accurately than we currently do.

*#10. With regard to membrane fluidity data, although they show the desired differences they could be made much more convincing with appropriate controls subtracting intrinsic fluorescence of the cells.*

The membrane fluidity data presented in the manuscript were subtracted from background fluorescence (blanks were samples with cells but without PDA dye). To make this clear, we updated the Methods section with this information.

*#11. Annotating lipids with the "most abundant fatty acid composition" is misleading - if isobaric species are not resolved the overall composition (total carbons, total double bonds) should be shown as primary annotation (possibly followed by the most abundant isomer).*

We now include the overall composition as primary annotation, together with a second column containing the most abundant isomer (Data S4). MS/MS analysis allows identification of the most abundant isomer (e.g. PC with a C18:1 and a C18:0 fatty acid) without assignment of the sn1/sn2 position of the respective fatty acids. It is important for experiments such as described in figure 3A to use identifiers containing individual fatty acids. LION-terms related to fatty acids cannot be associated to a dataset that lacks this information. To avoid confusion, we have renamed the lipid species from e.g. PC(18:1/18:0) to PC(18:1\_18:0) to indicate the fatty acid composition of lipid species without sn1/sn2 assignment.

### Expert editorial board comments on usability:

*The following comments are thus from the perspective of a potential user.*

*Can the authors specify the source of the 50,000 lipid species included into the analyses? To my knowledge the lipidmaps database reports around 42,000 entries only.*

We used the lipid classification system (hierarchy) in accordance with LIPIDMAPS. The individual lipid species in LION were constructed by combining lipid classes with abundant fatty acids. LIPIDMAPS is probably somewhat more stringent about the inclusion of lipid species in their database as they intend to provide additional information for individual species. We added a few lines (231-236) about the construction of individual lipid species in LION to the Methods section.

*The number of lipid species linked to experimental or in silico data is more than two orders of magnitudes lower than the indicated number of 50,000 and mainly refers to membrane lipids. Are all of these 50,000 species associated with one or more than one feature? Can the authors comment how many of these 50,000 lipids are associated with features going beyond chemical properties? What kind of cell biological features were used and which of these features were linked to which lipid species? In order to understand and validate the assignments a more detailed description would be helpful.*

Many lipids have a number of associations, whereas some lipids only have a few. As a consequence of the hierarchical structure of LION, lipids with only one association will not occur: lipids are (indirectly) associated with the neighbour's neighbour. To make this information more accessible for users, we improved the enrichment-report, which can be obtained by the button 'download report'. It now contains three files: a CSV-file with the enrichment information, a CSV-file containing all the LION-terms associated with the lipids in the dataset, and *vice versa*, a CSV-file containing all lipids of the dataset with associated LION-terms. With this information, users are better equipped to understand the underlying data structures and improve interpretation of obtained results.

*Can the authors comment on why they integrated coarse-grain but not (in addition) atomistic MD data?*

To our knowledge, there is no comprehensive lipid dataset available that has been obtained by atomistic molecular dynamics simulations. More importantly, the biophysical properties are categorized into distinct groups (very low, low, average, etc.). Given this categorization in groups, we suspect that the increased resolution of atomistic MD will be of no or very limited added value.

*Can the authors specify which data of the two papers in particular was included into building the application?*

We now provide a detailed supplemental table (Data S1) containing references per LION-term. Moreover, the source data and code are available via the script folder.

*The fact that the application in its current form is restricted to glycerol-based lipids and fatty acids should be indicated in the abstract and in the discussion of the dataset.*

We agree that the current LION database is not a complete end product. However, it is not true that LION only contains (associations to) glycerol-based lipids and fatty acids. The database includes many more: sphingolipids (sphingomyelins, ceramides, glycosphingolipids), cholesterol derivatives

and retinoids. As comprehensive biophysical data about these classes is hardly available or too complex in the case of cholesterol, not all these classes are associated with biophysical properties. The biophysical properties obtained by MD are limited to glycerol-based lipids. The transition temperatures are also associated with sphingomyelins. Cellular component, intrinsic curvature, headgroup charge are associated with many lipid classes. Limitations of LION/web are included in the Discussion section.

*For this first version of LION the authors included only information from two publications. There is an increasing amount of data available going beyond this information. Can the authors comment on how they plan to allow for integration of additional information? Will users be able to do so in a ‘ customized ’ fashion?*

We recognize the importance to involve users in the improvement of LION and LION/web. To this end, we added several features to the web-tool.

(i) We include an option (not selected by default for privacy reasons) that -when selected- informs us when lipids could not be matched to LION. This helps us to keep track of lipid identifiers that are often used, but not present in LION.

(ii) We include a contact form on the website to lower the threshold to contact us for questions, requests, suggestions or feedback.

Web-tool improvement will not stop after publication. Currently, we are working on features to build heat maps and principle component analyses within the web-tool. When new sources containing useful data become available, this will be added this to the database.

*The power of application depends on the number of features associated with each lipid species. Can the authors comment on how they plan to advance the data base, e.g., by including the community? Will the application be hosted and if so, what is the perspective?*

The full ontology, R-packages to perform enrichment analysis and R-code for the web-tool is publicly available. This is sufficient for experienced users to build customized versions of LION or the web-tool. We understand, however, that this will be challenging for inexperienced users. In the future, we plan to build a dedicated LION R-package with detailed instructions and guidelines to augment the ontology by individual users. An R-package provides more flexibility than a web-tool and the use of user-customized ontology versions will be easier to support.

The web-tool is currently hosted by Shinyapps.io. It will be hosted elsewhere in case this service discontinuous its operation. The domain name lipidontology.com is owned by the department and the web-tool LION/web will remain accessible via lipidontology.com.
