# Supplementary material for: LION/web: a web-based ontology enrichment tool for lipidomic data analysis
Source: PubMed Central journal article supplement (PMC6541037; doi:10.1093/gigascience/giz061), 2019-05-29
Supplement: giz061_giga-d-18-00357_revision_2.pdf [file giz061_giga-d-18-00357_revision_2.pdf]

|                                                      |                                                                                                                                                                                                                                                                                                                                                                                                                                                                                                                                                                                                                                                                                                                                                                                                                                                                                                                                                                                                                                                                                                                                                                                                                                                                                                                                                                                                                                                                                                                                                                 |                       |
|------------------------------------------------------|-----------------------------------------------------------------------------------------------------------------------------------------------------------------------------------------------------------------------------------------------------------------------------------------------------------------------------------------------------------------------------------------------------------------------------------------------------------------------------------------------------------------------------------------------------------------------------------------------------------------------------------------------------------------------------------------------------------------------------------------------------------------------------------------------------------------------------------------------------------------------------------------------------------------------------------------------------------------------------------------------------------------------------------------------------------------------------------------------------------------------------------------------------------------------------------------------------------------------------------------------------------------------------------------------------------------------------------------------------------------------------------------------------------------------------------------------------------------------------------------------------------------------------------------------------------------|-----------------------|
| <b>Manuscript Number:</b>                            | GIGA-D-18-00357R2                                                                                                                                                                                                                                                                                                                                                                                                                                                                                                                                                                                                                                                                                                                                                                                                                                                                                                                                                                                                                                                                                                                                                                                                                                                                                                                                                                                                                                                                                                                                               |                       |
| <b>Full Title:</b>                                   | LION/web: a web-based ontology enrichment tool for lipidomic data analysis                                                                                                                                                                                                                                                                                                                                                                                                                                                                                                                                                                                                                                                                                                                                                                                                                                                                                                                                                                                                                                                                                                                                                                                                                                                                                                                                                                                                                                                                                      |                       |
| <b>Article Type:</b>                                 | Technical Note                                                                                                                                                                                                                                                                                                                                                                                                                                                                                                                                                                                                                                                                                                                                                                                                                                                                                                                                                                                                                                                                                                                                                                                                                                                                                                                                                                                                                                                                                                                                                  |                       |
| <b>Funding Information:</b>                          | BE-BASIC<br>(BB/2012-10047)                                                                                                                                                                                                                                                                                                                                                                                                                                                                                                                                                                                                                                                                                                                                                                                                                                                                                                                                                                                                                                                                                                                                                                                                                                                                                                                                                                                                                                                                                                                                     | Prof. dr. Bernd Helms |
| <b>Abstract:</b>                                     | <p>A major challenge for lipidomic analyses is the handling of the large amounts of data and the translation of results to interpret the involvement of lipids in biological systems. We built a new lipid ontology (LION) that associates over 50,000 lipid species to biophysical, chemical and cell biological features. By making use of enrichment algorithms, we used LION to develop a web-based interface (LION/web, <a href="http://www.lipidontology.com">www.lipidontology.com</a>) that allows identification of lipid-associated terms in lipidomes. LION/web was validated by analyzing a lipidomic dataset derived from well-characterized sub-cellular fractions of RAW 264.7 macrophages. Comparison of isolated plasma membranes with the microsomal fraction showed a significant enrichment of relevant LION-terms including 'plasma membrane', 'headgroup with negative charge', 'glycerophosphoserines', 'above average bilayer thickness', and 'below average lateral diffusion'. A second validation was performed by analyzing the membrane fluidity of CHO cells incubated with arachidonic acid. An increase in membrane fluidity was observed both experimentally by using pyrene decanoic acid and by using LION/web, showing significant enrichment of terms associated with high membrane fluidity ('above average', 'very high' and 'high lateral diffusion', and 'below average transition temperature'). The results demonstrate the functionality of LION/web, which is freely accessible in a platform-independent way.</p> |                       |
| <b>Corresponding Author:</b>                         | Bernd Helms<br><br>NETHERLANDS                                                                                                                                                                                                                                                                                                                                                                                                                                                                                                                                                                                                                                                                                                                                                                                                                                                                                                                                                                                                                                                                                                                                                                                                                                                                                                                                                                                                                                                                                                                                  |                       |
| <b>Corresponding Author Secondary Information:</b>   |                                                                                                                                                                                                                                                                                                                                                                                                                                                                                                                                                                                                                                                                                                                                                                                                                                                                                                                                                                                                                                                                                                                                                                                                                                                                                                                                                                                                                                                                                                                                                                 |                       |
| <b>Corresponding Author's Institution:</b>           |                                                                                                                                                                                                                                                                                                                                                                                                                                                                                                                                                                                                                                                                                                                                                                                                                                                                                                                                                                                                                                                                                                                                                                                                                                                                                                                                                                                                                                                                                                                                                                 |                       |
| <b>Corresponding Author's Secondary Institution:</b> |                                                                                                                                                                                                                                                                                                                                                                                                                                                                                                                                                                                                                                                                                                                                                                                                                                                                                                                                                                                                                                                                                                                                                                                                                                                                                                                                                                                                                                                                                                                                                                 |                       |
| <b>First Author:</b>                                 | Martijn R. Molenaar                                                                                                                                                                                                                                                                                                                                                                                                                                                                                                                                                                                                                                                                                                                                                                                                                                                                                                                                                                                                                                                                                                                                                                                                                                                                                                                                                                                                                                                                                                                                             |                       |
| <b>First Author Secondary Information:</b>           |                                                                                                                                                                                                                                                                                                                                                                                                                                                                                                                                                                                                                                                                                                                                                                                                                                                                                                                                                                                                                                                                                                                                                                                                                                                                                                                                                                                                                                                                                                                                                                 |                       |
| <b>Order of Authors:</b>                             | Martijn R. Molenaar<br>Aike Jeucken<br>Tsjerk A. Wassenaar<br>Chris H. A. van de Lest<br>Jos F. Brouwers<br>Bernd Helms                                                                                                                                                                                                                                                                                                                                                                                                                                                                                                                                                                                                                                                                                                                                                                                                                                                                                                                                                                                                                                                                                                                                                                                                                                                                                                                                                                                                                                         |                       |
| <b>Order of Authors Secondary Information:</b>       |                                                                                                                                                                                                                                                                                                                                                                                                                                                                                                                                                                                                                                                                                                                                                                                                                                                                                                                                                                                                                                                                                                                                                                                                                                                                                                                                                                                                                                                                                                                                                                 |                       |
| <b>Response to Reviewers:</b>                        | <p>Reviewer #1:<br/>           The authors have responded appropriately to my comments, adding statistical options and an example of the target mode. In the pdf, the figure quality appears to be low, but that may be related to the conversion to pdf. In particular, I can't read the text on Figure 2 at all.</p> <p>We thank the reviewer for her support. Indeed, the low resolution is related to the pdf-conversion. There is a hyperlink on top of the figure pages to download the figures in</p>                                                                                                                                                                                                                                                                                                                                                                                                                                                                                                                                                                                                                                                                                                                                                                                                                                                                                                                                                                                                                                                    |                       |

|                                                                                                                                                                                                                                                                                                                                                                                                                                    |                                                                                                                                                                                                                                                                                                                                                                                                                                                                                                                                                                                                                                                                                                                                                                                                                                                                                                                                                                                                                                                                                                                                                                                                                                                                                                                                                                                                    |
|------------------------------------------------------------------------------------------------------------------------------------------------------------------------------------------------------------------------------------------------------------------------------------------------------------------------------------------------------------------------------------------------------------------------------------|----------------------------------------------------------------------------------------------------------------------------------------------------------------------------------------------------------------------------------------------------------------------------------------------------------------------------------------------------------------------------------------------------------------------------------------------------------------------------------------------------------------------------------------------------------------------------------------------------------------------------------------------------------------------------------------------------------------------------------------------------------------------------------------------------------------------------------------------------------------------------------------------------------------------------------------------------------------------------------------------------------------------------------------------------------------------------------------------------------------------------------------------------------------------------------------------------------------------------------------------------------------------------------------------------------------------------------------------------------------------------------------------------|
|                                                                                                                                                                                                                                                                                                                                                                                                                                    | <p>the original resolution.</p> <p>Reviewer #2:<br/>This is a tremendously improved version of the manuscript. All critiques are adequately addressed, and the current revision is logical and detailed.</p> <p>We appreciate the positive comments of the reviewer.</p> <p>A couple of minor comments:<br/>#1. The use of colon in the linear regression terms (Suppl. Material #8) is very confusing given the fact that these terms are actually something opposite, i.e., products of corresponding predictors. This should be explicitly stated and the colon changed to something more appropriate.</p> <p>We agree that the use of the colon in Supplementary Data 8 can be somewhat misleading. Accordingly, we changed the symbols into asterisks, a more appropriate way to indicate multiplication. The explanation has been added to each sheet of Supplementary Data 8.</p> <p>#2. For LION term describing fatty acids with 2 or more double bonds a conventional designation as PUFAs (polyunsaturated FA) should be mentioned; the same may be also applied to their monounsaturated and saturated counterparts.</p> <p>We thank the reviewer for pointing this out. We have changed the respective term names into 'polyunsaturated fatty acid', 'monounsaturated fatty acid' and 'saturated fatty acid', updated the web-tool and occurrences of these terms in the figures.</p> |
| <b>Additional Information:</b>                                                                                                                                                                                                                                                                                                                                                                                                     |                                                                                                                                                                                                                                                                                                                                                                                                                                                                                                                                                                                                                                                                                                                                                                                                                                                                                                                                                                                                                                                                                                                                                                                                                                                                                                                                                                                                    |
| <b>Question</b>                                                                                                                                                                                                                                                                                                                                                                                                                    | <b>Response</b>                                                                                                                                                                                                                                                                                                                                                                                                                                                                                                                                                                                                                                                                                                                                                                                                                                                                                                                                                                                                                                                                                                                                                                                                                                                                                                                                                                                    |
| Are you submitting this manuscript to a special series or article collection?                                                                                                                                                                                                                                                                                                                                                      | No                                                                                                                                                                                                                                                                                                                                                                                                                                                                                                                                                                                                                                                                                                                                                                                                                                                                                                                                                                                                                                                                                                                                                                                                                                                                                                                                                                                                 |
| <p><b>Experimental design and statistics</b></p> <p>Full details of the experimental design and statistical methods used should be given in the Methods section, as detailed in our <a href="#">Minimum Standards Reporting Checklist</a>. Information essential to interpreting the data presented should be made available in the figure legends.</p> <p>Have you included all the information requested in your manuscript?</p> | Yes                                                                                                                                                                                                                                                                                                                                                                                                                                                                                                                                                                                                                                                                                                                                                                                                                                                                                                                                                                                                                                                                                                                                                                                                                                                                                                                                                                                                |
| <p><b>Resources</b></p> <p>A description of all resources used, including antibodies, cell lines, animals and software tools, with enough information to allow them to be uniquely identified, should be included in the Methods section. Authors are strongly encouraged to cite <a href="#">Research Resource</a></p>                                                                                                            | Yes                                                                                                                                                                                                                                                                                                                                                                                                                                                                                                                                                                                                                                                                                                                                                                                                                                                                                                                                                                                                                                                                                                                                                                                                                                                                                                                                                                                                |

|                                                                                                                                                                                                                                                                                                                                                                                                                                                                                                                                                         |            |
|---------------------------------------------------------------------------------------------------------------------------------------------------------------------------------------------------------------------------------------------------------------------------------------------------------------------------------------------------------------------------------------------------------------------------------------------------------------------------------------------------------------------------------------------------------|------------|
| <p><a href="#">Identifiers</a> (RRIDs) for antibodies, model organisms and tools, where possible.</p> <p>Have you included the information requested as detailed in our <a href="#">Minimum Standards Reporting Checklist</a>?</p>                                                                                                                                                                                                                                                                                                                      |            |
| <p><b>Availability of data and materials</b></p> <p>All datasets and code on which the conclusions of the paper rely must be either included in your submission or deposited in <a href="#">publicly available repositories</a> (where available and ethically appropriate), referencing such data using a unique identifier in the references and in the “Availability of Data and Materials” section of your manuscript.</p> <p>Have you have met the above requirement as detailed in our <a href="#">Minimum Standards Reporting Checklist</a>?</p> | <p>Yes</p> |

[Click here to view linked References](#)

# LION/web: a web-based ontology enrichment tool for lipidomic data analysis

Martijn R. Molenaar<sup>§</sup>, Aike Jeucken<sup>§&</sup>, Tsjerk A. Wassenaar<sup>‡</sup>, Chris H. A. van de Lest<sup>§</sup>, Jos F.  
Brouwers<sup>§</sup>, J. Bernd Helms<sup>\*§</sup>

<sup>§</sup> Department of Biochemistry and Cell Biology, Faculty of Veterinary Medicine, Utrecht  
University, 3584 CM, Utrecht, The Netherlands

<sup>‡</sup> Groningen Biomolecular Sciences and Biotechnology Institute and Zernike Institute for  
Advanced Materials, University of Groningen, 9747 AG Groningen, The Netherlands

*ORCID*s:

M.R.M: 0000-0001-5221-608X; T.A.W: 0000-0002-6345-0266; C.H.A.v.d.L.: 0000-0003-  
2143-2825; J.F.B: 0000-0003-2924-3279; J.B.H.: 0000-0001-7311-3821

<sup>&</sup> Current address: Membrane Enzymology, Groningen Biomolecular and Biotechnology  
Institute (GBB), University of Groningen, 9747AG Groningen, The Netherlands

\* To whom correspondence should be addressed: J.B.H (J.B.Helms@uu.nl)

1 **ABSTRACT**

2 A major challenge for lipidomic analyses is the handling of the large amounts of data and the  
3 translation of results to interpret the involvement of lipids in biological systems. We built a  
4 new lipid ontology (LION) that associates over 50,000 lipid species to biophysical, chemical  
5 and cell biological features. By making use of enrichment algorithms, we used LION to  
6 develop a web-based interface (LION/web, [www.lipidontology.com](http://www.lipidontology.com)) that allows identification  
7 of lipid-associated terms in lipidomes. LION/web was validated by analyzing a lipidomic  
8 dataset derived from well-characterized sub-cellular fractions of RAW 264.7 macrophages.  
9 Comparison of isolated plasma membranes with the microsomal fraction showed a significant  
10 enrichment of relevant LION-terms including ‘plasma membrane’, ‘headgroup with negative  
11 charge’, ‘glycerophosphoserines’, ‘above average bilayer thickness’, and ‘below average  
12 lateral diffusion’. A second validation was performed by analyzing the membrane fluidity of  
13 CHO cells incubated with arachidonic acid. An increase in membrane fluidity was observed  
14 both experimentally by using pyrene decanoic acid and by using LION/web, showing  
15 significant enrichment of terms associated with high membrane fluidity ('above average',  
16 'very high' and 'high lateral diffusion', and 'below average transition temperature'). The  
17 results demonstrate the functionality of LION/web, which is freely accessible in a platform-  
18 independent way.

19

20 **KEYWORDS**

21 lipidomics; lipids; membrane biology; lipid ontology; LION; LION-term enrichment analysis;  
22 membrane biology; web-tool; data analysis; LION/web

23

## 24 **BACKGROUND**

25 The comprehensive study of lipids, also termed lipidomics, is gaining momentum.  
26 Instrumentation is becoming increasingly more sensitive, precise and fast, and the use of  
27 lipidomics to address key questions in membrane biology has become widespread. As a result,  
28 datasets are rapidly increasing both in terms of size and complexity. Due to a lack of methods  
29 to perform global and in-depth data mining, lipidomic research tends to focus on individual  
30 lipid classes or lipid species. A common approach in other ‘omics’ disciplines to reduce  
31 complexity is the use of ontologies *e.g.*, Gene Ontology [1], Chemical Entities of Biological  
32 Interest ontology [2], combined with statistical tools to determine terms of interest. Although  
33 lipid structure is closely related to lipid function, it is currently impossible to associate  
34 properties of individual lipids with complex lipid mixtures of cellular lipidomes. Examples of  
35 biophysical properties that play an important role in membrane biology are numerous and  
36 include membrane thickness (*e.g.*, as driving force in the sub-cellular localization of proteins  
37 [3]), membrane fluidity (*e.g.*, regulating bacterial survival [4], membrane heterogeneity in  
38 cellular signaling [5]), intrinsic curvature (*e.g.*, of lipids as key player in lipid droplet  
39 biogenesis [6,7] or COPI coat disassembly [8]), and net charge (*e.g.*, of membranes as a  
40 determinant in lipid-protein interactions [9]). Here, we aim to provide a lipid ontology  
41 database and complementary enrichment analysis tool that (i) contains chemical and  
42 biophysical information of lipid species, (ii) is platform independent and compatible with  
43 routine mass spectrometry-based lipid analysis, (iii) can be used by researchers without  
44 computer programming skills, and (iv) is freely available to the scientific community.

45

46

47 **FINDINGS**

48 *Basic structure of LION*

49 We constructed an ontology database called LION (**File S1**) that links over 50,000 lipid  
50 species with four major branches: ‘lipid classification’ (the LIPIDMAPS classification  
51 hierarchy [10]), ‘chemical and physical properties’ (fatty acid length and unsaturation,  
52 headgroup charge, intrinsic curvature, membrane fluidity, bilayer thickness), ‘function’, and  
53 ‘subcellular component’ (predominant subcellular localisation). The resulting database  
54 contains more than 250,000 connections (‘edges’), providing a detailed system for in-depth  
55 annotation of lipids. An example of all LION-terms associated with a single  
56 phosphatidylserine (PS) lipid species, PS(34:2), is depicted in **Figure S1**. We describe the  
57 construction of LION in more detail in the Methods section. All LION-terms, classification  
58 rules and references are described in **Data S1**, all lipids currently supported by LION are  
59 described in **Data S2**.

60

61 *Addition of biophysical properties to LION*

62 An important feature of LION is the association of lipid species with biophysical properties.  
63 We made use of experimental data (from five phospholipid classes and sphingomyelin) [11]  
64 and data (from five phospholipid classes) obtained by coarse-grain molecular dynamics  
65 simulation (CG-MD) [12], each providing distinct biophysical properties . These data were  
66 used to estimate the biophysical properties of all related lipids in the LION-database by  
67 multiple linear regression analysis.

68 The regression models were validated in two ways. First, we performed leave-one-out cross-  
69 validations (LOOCV) of all three models (**Fig. S2 A-C**), showing satisfactory agreement  
70 between determined and predicted values. Second, we compared two properties closely  
71 associated with membrane fluidity: ‘transition temperature’ (from experimental datasets) and  
72 ‘lateral diffusion’ (from the CG-MD datasets) (**Fig. S2 D**). As expected, lipids with low

73 transition temperatures were predicted to have high lateral diffusion values at a defined  
74 simulation temperature and vice versa.  
75 Subsequently, all numerical datapoints for each biophysical property were categorized into  
76 five pre-defined groups ('very low', 'low', 'average', 'high', 'very high'). We aimed to find  
77 group definitions with physiological relevance. Therefore, limits of each group were  
78 calculated on the basis of four mammalian lipidomics publications that served as a reference  
79 [13-16]. Using these group definitions, numerical values of all applicable lipid species present  
80 in LION were classified and connected to their respective LION-term (**Fig. S2 E**).

81

### 82 *LION enrichment analysis and web-tool LION/web*

83 Next, we used LION as a basis to build an ontology enrichment tool that facilitates reduction  
84 of lipidome complexities in an unbiased manner. To this end, we made use of an adapted  
85 version of 'topGO', an R-package designed for enrichment analysis of GO-terms [17].  
86 Subsequently, we designed a web-tool with R-package Shiny ('LION/web',  
87 [www.lipidontology.com](http://www.lipidontology.com)) that offers an intuitive user-interface and supports two major  
88 workflows (**Fig. 1**): enrichment analysis of a subset of lipids of interest ('target-list mode')  
89 and enrichment analysis performed on a complete and ranked list of lipids ('ranking mode',  
90 referred to as 'SAFE' and described in the context of genes [18]). A detailed step-by-step  
91 description of LION/web's workflow can be found in **Note S1**.

92 Analogous to Gene Ontology enrichment approaches [1], which facilitate pre-selection of  
93 ontology sub-domains or subsets of GO-terms ('GO-slims'), LION/web offers the option to  
94 limit analysis to specific LION-terms of interest. Furthermore, the web-tool allows removal of  
95 the most generic LION-term (the one with the highest hierarchy) if a related term contains the  
96 same subset of lipids. For example, the term 'diacylglycerophosphocholines' might be  
97 associated with the same lipids as 'glycerophosphocholines'. With this option switched on,  
98 only the most specific term ('diacylglycerophosphocholines') is included in the results.



### 100 *Performance of 'target-list mode' by LION/web*

101 To test the functionality of LION/web, we made use of a previously published and well  
102 characterized dataset containing lipidomics data from several sub-cellular fractions of RAW  
103 264.7 macrophages, with or without TLR-4 activation by Kdo<sub>2</sub>-lipid A (KLA) [13] (see  
104 Methods for a direct link to the dataset). First, we re-normalized the dataset by expressing all  
105 lipid species as fraction of the total amount of lipid per sample. Subsequently, the data were  
106 visualized by constructing a heat map graph (**Fig. 2 A**). Lipid species were grouped into 10  
107 clusters by hierarchical clustering. Each lipid cluster was subsequently analyzed by  
108 LION/web, which was able to reformat and match the vast majority (>97%) of the submitted  
109 lipids in the dataset. In the 'target-list mode', LION/web assesses the enrichment of LION-  
110 terms in a subset of lipids, as compared to all lipids in the experiment. For every cluster, lipids  
111 (**Data S3**) were entered as target-list and compared with the background list. Enrichment  
112 analysis of all 10 clusters resulted in at least one significant LION-term (**Fig. 2 B**). The heat  
113 map showed that lipids present in clusters 7 and 8 were abundant in the mitochondrial  
114 fractions (**Fig. 2 A**). In line with this observation, enrichment analyses of these clusters  
115 resulted in significant terms associated with this organelle (*e.g.*,  
116 'diacylglycerophosphoethanolamines', 'mitochondrion', 'diacylglycerophosphoglycerols',  
117 'headgroup with negative charge'). Similar results were obtained for cluster 6 (terms related  
118 to the plasma membrane), and to lesser extent for cluster 9 (terms related to endoplasmic  
119 reticulum). Lipids in cluster 5 were more abundant in KLA-treated fractions and resulted in  
120 terms reported by LION/web that were associated with low membrane fluidity.

121

### 122 *Performance of 'ranking mode' by LION/web*

123 An alternative method to assess enrichment of LION-terms in LION/web is the 'ranking-  
124 mode'. In the 'ranking-mode', all individual lipid species of two conditions are compared and  
125 ranked based on a 'local' statistic. This local statistic is any numeric value that associates

126 individual (hence ‘local’) lipids with the provided conditions. LION/web supports three  
127 different local statistics: one-tailed Welch two sample t-tests *P*-values (comparison of 2  
128 conditions); <sup>2</sup>log fold-change values (comparison of 2 conditions) and one-way ANOVA F-  
129 tests *P*-values (comparison of >2 conditions). Subsequently, the distributions of all associated  
130 LION-terms over the ranked list are compared to uniform distributions by using one-tailed  
131 Kolmogorov–Smirnov tests (‘global’ statistics, as full lipidomes are assessed). A LION-term  
132 is enriched when its associated lipids are higher ranked than expected by chance. To illustrate  
133 the ‘ranking mode’, we compared the isolated PM fraction (samples #19-21 from **Fig. 2 A**)  
134 with the ER fraction (samples #13-15 from **Fig. 2 A**) from non-stimulated macrophages using  
135 one-tailed Welch two sample t-tests *P*-values as local statistic. Subsequently, LION/web  
136 assessed all LION-terms for enrichment (**Fig. 2 C**). In good agreement with current  
137 descriptions of the selected organelles [19,20], significant enriched LION-terms included  
138 terms associated with chemical descriptions (*e.g.*, ‘glycerophosphoserines’, ‘headgroup with  
139 negative charge’, ‘phosphosphingolipids’), biological features (‘plasma membrane’) and  
140 biophysical properties (*e.g.*, ‘above average bilayer thickness’, ‘below average lateral  
141 diffusion’, ‘very low lateral diffusion’, ‘very high bilayer thickness’, ‘neutral intrinsic  
142 curvature’). LION/web also reported the significant enrichment of ‘very high transition  
143 temperature’, which is in line with the (very) low lateral diffusion terms (see also **Fig. S2 D**).  
144 The term ‘very low transition temperature’ was also reported to be significantly enriched.  
145 Inspection of the lipid species responsible for the LION-term ‘very low transition  
146 temperature’ revealed the presence of lipids that all contain polyunsaturated fatty acids  
147 (PUFAs) with at least four unsaturations. This may be a macrophage-specific phenomenon,  
148 related to their involvement in inflammation [21].

149

### 150 *Enrichment performance of chemical and biophysical LION-terms*

151 To further characterize the enrichment of chemical and biophysical properties by LION/web,  
152 we used two different experimental approaches. First, we investigated the enrichment of

153 chemical features that can be easily incorporated into lipids. To this end, CHO-k1 cells were  
154 incubated overnight in the presence of palmitic acid (PA), linoleic acid (LA) or arachidonic  
155 acid (AA) complexed to bovine serum albumin (BSA). Subsequently, lipids were analysed by  
156 LC-MS/MS and quantified. When available, we used MS/MS data to annotate lipids with  
157 their most abundant fatty acid composition. This level of annotation is important as it enables  
158 LION to link input lipids with terms associated with fatty acids (**Data S4** and **Fig. S3**). Next,  
159 the web-tool was set to use the ‘ranking mode’ and to limit analysis to LION-terms indicating  
160 the presence of fatty acids as lipid building blocks. LION/web reliably reported the significant  
161 enrichment of the respective fatty acid in the three different conditions (**Fig. 3 A** and **Data**  
162 **S5**).

163 Second, to investigate the enrichment of biophysical LION-terms, we incubated CHO-k1 cells  
164 with arachidonic acid (AA). This procedure is known to increase membrane fluidity [22].  
165 After incubation, the membrane fluidity properties of the samples were analyzed both  
166 experimentally and by LION/web. Membrane fluidity was experimentally assessed using  
167 pyrene decanoic acid (PDA) (**Fig. 3 B**). This fluorescent probe can exist as monomer or  
168 excimer, resulting in a shift of its emission spectrum. The ratio of excimer over monomer  
169 fluorescence is proportional to the degree of membrane fluidity [23]. As expected, the ratio of  
170 excimer/monomer forms of PDA revealed a significant increase in membrane fluidity of  
171 lysates in the presence of AA (**Fig. 3 C**). For parallel LION/web analysis of membrane  
172 fluidity properties, lipids were extracted from the same samples and analysed by LC-MS/MS  
173 (**Data S6** and **Fig. S4**). LION contains two sets of terms associated with membrane fluidity:  
174 ‘transition temperature’ and ‘lateral diffusion’. Accordingly, LION/web was set to limit  
175 enrichment analyses to these sets, after which the lipidomic data were analyzed (‘ranking  
176 mode’). In line with the experimentally measured increase in membrane fluidity, terms  
177 associated with high membrane fluidity (‘above average’, ‘very high’ and ‘high lateral  
178 diffusion’, and ‘below average transition temperature’) were significantly enriched in cells  
179 that had been treated with AA (**Fig. 3 D** and **Data S7**).

180

## 181 **DISCUSSION**

182 Despite the quick grow of lipidomics and the rise of many tools to process raw data into lipid  
183 compositions [24], no automated pipeline to reduce complexity in lipidomic datasets using  
184 prior knowledge was yet available. Such a tool facilitates the generation of hypotheses, which  
185 is an important aim in many omics experiments. Here, we have presented a new ontology  
186 called LION and have used this ontology to build a web-based online LION-term enrichment  
187 tool suited to fulfill this need. In a single analysis, trends in complex lipidomic datasets can  
188 now be assessed in a standardized way. The web-tool assures that the pipeline is accessible to  
189 users that are not familiar with programming languages.

190 Just like enrichment analysis approaches in other omics fields, LION-term enrichment  
191 analysis comes with specific strengths and limitations. The quality and coverage of the  
192 underlying ontology is of great importance. For LION, we aimed to support most commonly  
193 found lipid species in mammalian systems. In our examples, >85% of the input lipids could  
194 be matched to the ontology. Due to the great diversity of lipidomes in different organisms, this  
195 coverage could be lower in user-provided datasets from non-mammalian systems. We hope  
196 to support LION's coverage of plant, bacterial and yeast lipidomes better in the future.

197 LION/web offers users several feedback options to keep track of missing annotations and to  
198 act specifically upon users' needs.

199 It is important to note that the enrichment of biophysical properties such as membrane  
200 fluidity, membrane thickness and curvature cannot replace functional assays. More factors  
201 than lipids alone – protein composition, temperature - are playing important roles. Moreover,  
202 the effect of cholesterol is complex and depends on the interaction with other lipids.

203 Therefore, the biophysical effects of cholesterol are not included. Also, the relative amounts  
204 of lipids in the described enrichment analysis methods are not taken into account: low  
205 abundant lipids contribute equally to enrichment as their high abundant counterparts.

206 This limitation can be circumvented by defining local statistics that takes abundancies into

207 account. This type of statistic will become more urgent when lipidomic analyses shifts from  
208 mostly semi-quantitative to quantitative analyses in the future.  
209 In summary, LION/web reveals changes in lipid patterns that allow researchers to study the  
210 complexity of lipidomes in a biological context. With future expansions of the LION database  
211 and of LION/web (also upon request of the scientific community), LION/web will be  
212 increasingly successful to bridge the gap between lipidomics and cell biology.

213

## 214 **METHODS**

### 215 **Creation of lipid ontology (LION)**

216 We built an ontology database that connects lipid species to the following four major  
217 branches: ‘lipid classification’, ‘function’, ‘cellular component’ and ‘physical or chemical  
218 properties’. For readability, a term is included at the top of each branch to indicate the nature  
219 of a LION-branch. These ‘category’ terms are distinguished from other LION-terms with an  
220 ID containing the prefix ‘CAT’.

221 The classification system is based on the LIPIDMAPS classification [10]. LIPIDMAPS does  
222 not support lipid species with summed fatty acid. However, this extra layer is useful as it  
223 enables mapping or when exact fatty acid compositions of measured lipids are not known.

224 This concept is also used in the Swiss Lipids system [25]. Downstream, individual lipid  
225 species belonging to classes described in **Data S1** were constructed as combinations of the  
226 following fatty acids: C12:0; C14:0; C14:1; C16:0; C16:1; C18:0; C18:1; C18:2; C18:3;  
227 C20:0; C20:1; C20:2; C20:3; C20:4; C20:5; C22:0; C22:1; C22:2; C22:3; C22:4; C22:5;  
228 C22:6; C24:0; C24:1; C24:2; C24:3; C24:4; C24:5; C24:6; C26:0; C26:1; C26:2; C26:3;  
229 C26:4; C26:5; C26:6 and C26:7. For sphingolipids, sphingosine (d18:1) and sphinganine  
230 (d18:0) were used as possible backbones. In the current version, LION does not distinguish  
231 between *sn*-positions. Fatty acids were ordered by chain length (low to high) and number of  
232 unsaturations (low to high). Altogether, LION contains circa 50,000 lipid species.

233 The branch ‘function’ comprises three subcategories: ‘membrane component’ (associated with  
234 lipids that are primary regarded as structural component of lipid bilayers), ‘lipid-mediated  
235 signaling’ (lipids that have been implicated in signaling) and ‘lipid-storage’ (lipids that are  
236 associated with storage, primarily in lipid droplets). In the category ‘cellular component’,  
237 lipid classes that are enriched in particular cellular organelles are linked to their  
238 corresponding organelle terms [7,19,20]. The branch ‘physical or chemical properties’  
239 comprises a number of subcategories. First, a number of chemical descriptions (‘contains  
240 fatty acid’, ‘fatty acid unsaturation’, ‘fatty acid length’ and ‘type by bond’) was inferred from  
241 the species names. Second, data about ‘intrinsic curvature’ [7,26] were categorized into either  
242 negative, neutral or positive curvature. As data on species-level are limited, curvature was  
243 assumed to be predominantly headgroup-dependent and fatty acid composition was neglected.  
244 The third subcategory, ‘charge headgroup’, was divided into three groups based on structural  
245 data: ‘negative’, ‘positive/zwitter-ion’ and ‘neutral’ [25]. This last term comprises also lipids  
246 lacking a headgroup. The fourth subcategory in ‘physical or chemical properties’ is ‘chain-  
247 melting transition temperature’. This property is derived from a number of sources,  
248 comprehensively reviewed by Marsh [11]. This dataset covers a range of lipid classes in both  
249 glycerophospholipids (PC, PE, PG, PA, PS) and sphingolipids (SM). We made use of multiple  
250 linear regression analysis with lipid class, fatty acid length and unsaturation as predictors to  
251 facilitate data extrapolation to previously unreported lipid species. The obtained model  
252 (coefficients are available via **Data S8**) was validated by leave-one-out cross-validation  
253 (LOOCV). Briefly, one datapoint from the dataset was taken out, after which the model was  
254 rebuilt with the remaining points as training set. Subsequently, the selected datapoint was  
255 used as validation sample. This procedure was repeated for all the datapoints (**Fig. S2 C**).  
256 Ontologies contain categorical data and are not compatible with numeric values. Therefore,  
257 we classified chain-melting transition temperature values into five distinct categorical data  
258 groups: ‘very low’, ‘low’, ‘average’, ‘high’ or ‘very high’ chain-melting transition temperature.  
259 To define the limits of these intrinsic subjective groups, we used four previously reported

260 datasets to serve as reference lipidomes [13–16]. From all reported lipids, the transition  
261 temperature was predicted by the model. The obtained transition temperature distribution was  
262 used to define the groups: the lowest 20% (first quintile) was classified as ‘very low’, the  
263 second 20% (second quintile) as ‘low’, etc. Subsequently, these limits were used to categorize  
264 all lipid species present in LION. Lipids with transition temperature values lower than the  
265 lowest limit were defined as ‘very low’, whereas values higher than the highest limit were  
266 defined as ‘very high’. A flow-chart of this procedure is depicted in **Fig. S2 E**.

267 In addition to these experimental data sets, we also used data [12] that was obtained by coarse  
268 grain molecular dynamics simulation (MARTINI force-field [27]) and which includes  
269 membrane properties ‘bilayer thickness’ and ‘lateral diffusion’. The dataset contains lipids  
270 from five common classes of glycerophospholipids (PC, PS, PG, PA, PE), but lacks  
271 sphingolipids and sterols. By definition, coarse-grained lipids represent a range of structures.  
272 To be able to use the dataset in the ontology system, names of coarse-grained lipids were  
273 translated into their representing counterparts. Subsequently, lipid properties were  
274 extrapolated to the entire database by multiple linear regression analysis models (with lipid  
275 class, fatty acid length and unsaturation as predictors, coefficients are available via **Data S8**)  
276 and validated by LOOCV (**Fig. S2 A-B**). We followed the same procedure as used for  
277 transition temperatures; extrapolated results for both properties were categorized into  
278 representative classes: ‘very low’, ‘low’, ‘average’, ‘high’ or ‘very high’, based on values,  
279 predicted by our models, of the reference datasets [13–16].

280 The initial structure of LION was built with OBOEdit v.2.3.1 [28] and formatted as OBO-file.  
281 Subsequently, custom R-scripts connected specific terms with more general terms based on  
282 the described datasets. The entire ontology can be found as **File S1**.

### 283 **Implementation of enrichment analysis tool**

284 To use LION with existing ontology enrichment tools, we used an adapted and generalized  
285 version of Bioconductor R-package ‘topGO’ [17]. This version, called ‘topOnto’, allows users  
286 to include ontologies other than those provided with the package. TopOnto’s attached Perl-

287 script was used to convert the ontology file from OBO- to SQLite-format. Apart from this  
288 extra feature, the ‘topOnto’ package provides the same functionality as the original version.  
289 To perform the enrichment analysis, two statistical approaches are used. In the ‘target-list  
290 mode’, one-tailed Fisher-exact statistics are used to test enrichment. To this end, 2x2  
291 contingency tables are constructed for every LION-term, containing the number of lipids  
292 associated and not associated with the given term for both the target-list and the background  
293 set, and analyzed. In the ‘ranking mode’, one-tailed Kolmogorov-Smirnov tests are used as  
294 ‘global’ statistics to assess enrichment of LION-terms over a ranked (by ‘local’ statistics) list  
295 of lipids. For every LION-term, the cumulative distribution of associated lipids over the  
296 ranked list is compared with the uniform distribution. Enrichment is defined as over-  
297 representation of highly ranked lipids associated with the term. To rank input lipids,  
298 LION/web offers three different ‘local’ statistics: *P* values from one-tailed Welch t-tests (2  
299 condition comparison), <sup>2</sup>log fold-change values (2 condition comparison) and *P* values from  
300 one-way ANOVA F-tests (>2 conditions comparison). Ranking direction (from high to low, or  
301 vice versa) is automatically updated after local statistic selection, but can be set manually. In  
302 addition, users can use custom local statistics. In both modes, topGO’s classic algorithm is  
303 selected [17]. After LION enrichment analysis, raw *P* values are corrected for multiple testing  
304 (Benjamini-Hochberg). The R-scripts were used to build the user-friendly web-based tool  
305 LION/web (**Note S1**) with R-package ‘shiny’. The application has been made available on the  
306 shinyapps.io server as a free online tool, accessible through <http://www.lipidontology.com/>.

307

### 308 **Cell culture and preparation of fatty acid-albumin complexes**

309 CHO-k1 cells were cultured in Ham’s F-12 medium (Thermo Fisher Scientific, Waltham,  
310 MA, USA) supplemented with 7.5% FBS (Thermo Fisher Scientific, Waltham, MA, USA),  
311 100 units/ml penicillin and 100 µg/ml streptomycin (Thermo Fisher Scientific, Waltham, MA,  
312 USA). Cells were grown in a humidified incubator at 37°C containing 5% CO<sub>2</sub> and passaged



313 twice a week. Stocks of 10 mM arachidonic acid, linoleic acid, oleic acid, or palmitic acid (all  
314 obtained from Sigma, St. Louis, MO, USA) were complexed to 2 mM fatty-acid free BSA  
315 (Sigma, St. Louis, MO, USA), filter-sterilized and stored at  $-20^{\circ}\text{C}$ . Control incubations  
316 without fatty acid contained equivalent amounts of fatty-acid free BSA. All experimental  
317 incubations were performed in plastic 6-well culture dishes (Corning, Tewksbury, MA, USA).

### 318 **Measuring membrane fluidity**

319 After overnight incubation in the absence or presence of fatty-acids (using fatty acid-free BSA  
320 or fatty acids coupled to BSA, respectively), cells were washed and scraped in PBS. Cells  
321 were subsequently homogenized on ice with 26-gauge needles (BD Bioscience, San Jose, CA,  
322 USA). Homogenates (equivalent to 40,000 cells) were mixed 1:1 with the manufacturer's  
323 supplied dilution buffer (Membrane fluidity kit, Abcam, Cambridge, UK) in the absence  
324 (background) or presence of  $5\ \mu\text{M}$  pyrenedecanoic acid (PDA) and transferred into a 96-well  
325 plate (black plastic with glass bottom, Greiner Bio-One, Frickenhausen, Germany). After 30  
326 minutes of incubation at  $37^{\circ}\text{C}$ , fluorescence spectra (excitation at 360 nm, emission between  
327 375-500 nm,  $37^{\circ}\text{C}$ ) were measured with a temperature-controlled fluorescence microplate  
328 reader (CLARIOstar, BMG Labtech, Offenburg, Germany). Data were processed in R by  
329 expressing monomer (370-390 nm) and excimer (470-490 nm) as ratios of mean fluorescence  
330 after subtraction of background fluorescence (samples with cells but without PDA). Results  
331 were expressed as means. Differences were analyzed by two-tailed Welch's t-tests.

332

### 333 **Lipidomics by LC-MS/MS**

334 After incubation, lipids were extracted as described before [29]. Lipid extracts were dried  
335 under nitrogen and dissolved in  $100\ \mu\text{L}$  chloroform/methanol (1:1) and injected ( $10\ \mu\text{L}$ ) on a  
336 hydrophilic interaction liquid chromatography (HILIC) column ( $2.6\ \mu\text{m}$  HILIC  $100\ \text{\AA}$ ,  $50\ \times$   
337  $4.6\ \text{mm}$ , Phenomenex, Torrance, CA). Lipid classes were separated by gradient elution on an  
338 Infinity II 1290 UPLC (Agilent, Santa Clara, CA, USA). At a constant flow rate of  $1\ \text{ml/min}$ ,

339 ACN/acetone (9:1, v/v) was used as solvent A. Solvent B consisted of a mixture of ACN/H<sub>2</sub>O  
340 (7:3, v/v) with 10mM ammonium formate. Both solvents contained 0.1% formic acid. The  
341 gradient was as follows (time in min, %B): (0, 0), (1, 50), (3, 50), (3.1, 100), (4, 100).  
342 Samples were injected without re-equilibration of the column. The column effluent was  
343 connected to a heated electrospray ionization (hESI) source of an Orbitrap Fusion mass  
344 spectrometer (Thermo Scientific, Waltham, MA) operated at -3600V in the negative  
345 ionization mode. Temperatures for the vaporizer and ion transfer tube were 275°C and 380°C,  
346 respectively. Full scan MS1 measurements in the mass range from 450 to 1150 amu were  
347 collected in the orbitrap at a resolution of 120,000. Parallelized data-dependent MS2  
348 experiments were done with HCD fragmentation set at 30V, using the dual stage linear ion  
349 trap to generate up to 30 spectra per second.

350

#### 351 **Lipidomics data analysis**

352 Acquired raw datafiles were converted to mzXML-files by msConvert (part of ProteoWizard  
353 v3.0.913) [30] and processed with R-package 'xcms' v2.99.3 [31]. After deisotoping,  
354 annotation of lipids was performed by matching measured MS-1 m/z values with theoretical  
355 m/z values. Lipids with the same or similar m/z values - *e.g.*, BMP(38:4) and PG(38:4) -  
356 could be distinguished by differences in retention time (**Fig. S3 and S4**). Lipid annotation  
357 containing individual fatty acids (extra column 'most abundant isomer annotation' in **Data**  
358 **S4**) as used in **Fig. 2 A** and **Fig. S3** was accomplished by examining MS-2 spectra. When  
359 MS-2 spectra were available for a given MS-1 peak, the most abundant fatty acid combination  
360 was used to annotate the lipid. The resulting experimental datasets, as well as the public RAW  
361 264.7 macrophage dataset [13], were normalized by expressing all lipids as ratios of the sum  
362 of all intensities per sample. MetaboAnalyst 3.0 [32] was used to replace missing values (of  
363 the RAW 264.7 dataset) by half of the minimum positive value in the original data, and to  
364 perform Principal Component Analysis (with Pareto scaling).

365 **Heat map, hierarchical cluster analysis and LION-enrichment analyses**

366 The heat map of the RAW 264.7 dataset was constructed after calculating z-scores for all  
367 lipids (all lipids were scaled to a mean of zero and a standard deviation of 1) using R-package  
368 ‘pheatmap v1.0.10’. Lipids were grouped by hierarchical clustering. The dendrogram of the  
369 lipids on the y-axis of the heatmap used Euclidean distance as the similarity measure and was  
370 performed with complete linkage. The number of clusters was set to 10. Enrichment analysis  
371 of each of the 10 clusters was performed using the ‘target-list mode’ with default settings.  
372 Enrichment analyses used in **Fig. 2 C** and **Fig. 3 A and D** were performed using the ‘ranking  
373 mode’, with one-tailed Welch two sample t-tests P-values as local statistics. The analysis for  
374 **Fig. 2 C** was performed with default settings, whereas LION-terms to be considered were  
375 limited to all child-terms of 'contains fatty acid' (CAT:0000100) for **Fig. 3 A** and all child-  
376 terms of 'chain-melting transition temperature' (CAT:0001734) and 'lateral diffusion'  
377 (CAT:0080950) for **Fig. 3 D**.

378

379 **Software and R-packages**

380 All R-scripts were run with RStudio v1.0.153 (R v3.4.4) with the following packages: ‘shiny  
381 v1.1.1’, ‘visNetwork v2.0.1’, ‘data.table v1.10.4-2’, ‘GMD v0.3.3’, ‘igraph v1.0.1’, ‘reshape2  
382 v1.4.2’, ‘ggplot2 v2.2.1’, ‘ggthemes v3.4.0’, ‘shinyTree v0.2.2’, ‘shinyWidgets v0.4.1’,  
383 ‘shinythemes v1.1.1’, ‘RSQLite v2.1.1’, ‘topOnto v0.99.0’, ‘pheatmap v1.0.10’ and ‘xcms  
384 v2.99.3’ [31]. Perl-scripts provided with the topOnto package were run with Perl v5.26.0. All  
385 figures were built in R and processed in Cytoscape v3.5.1 or Inkscape v0.92.2.

386 **Availability of source code and requirements**

387 The source code of the web-tool is available via github.

388 Project name: LION-web

389 Project home page: <https://github.com/martijnmolenaar/LION-web/>

390 Operating system(s): platform independent

391 Programming language: R

392 License: GNU General Public License v3.0

393 RRID: SCR\_017018

#### 394 **Availability of supporting data**

395 The LION database (OBO-format) and raw lipidomics data are available as Supplementary  
396 Data. The public RAW 264.7 macrophages dataset [13] is available on the journal's website  
397 [33]. R-package 'topOnto' is available at [34], the associated R-package containing the LION  
398 database in topOnto-friendly format at [35]. Snapshots of our code and other supporting data  
399 are available in the *GigaScience* repository, GigaDB [36].

#### 400 **ABBREVIATIONS**

401 LION: lipid ontology; CG-MD: coarse-grain molecular dynamics simulation; LOOCV: leave-  
402 one-out cross-validations; GO: gene ontology; PUFA: polyunsaturated fatty acid; PA: palmitic  
403 acid; LA: linoleic acid; AA: arachidonic acid; BSA: bovine serum albumin; LC-MS/MS:  
404 liquid chromatography – tandem mass spectrometry; PDA: pyrene decanoic acid; CSV:  
405 comma separated values

#### 406 **COMPETING FINANCIAL INTERESTS**

407 The authors declare no competing financial interests.

#### 408 **FUNDING**

409 This research was supported by grant number BB/2012-10047 of the biobased ecologically  
410 balanced sustainable industrial chemistry (BE-BASIC) project to JBH and JFB.

411

#### 412 **AUTHOR CONTRIBUTIONS**

413 M.R.M. and J.B.H. conceived the project. M.R.M. developed LION, LION/web and  
414 performed the experiments. A.J. tested and suggested improvements for LION/web.

415 C.H.A.v.d.L. and T.A.W. contributed to the regression models and statistical concepts.  
416 C.H.A.v.d.L. and J.F.B. contributed to the lipidomics data processing and analysis. M.R.M.  
417 and J.B.H. wrote the manuscript.

418

## 419 **ACKNOWLEDGEMENTS**

420 We thank Xin He, PhD, for providing and supporting the topONTO R-package. We thank  
421 Jeroen W.A. Jansen for the excellent technical assistance with the lipidomics experiments.

422

423

## 424 **ADDITIONAL MATERIAL**

425 **Figure S1.** LION-terms associated with PS(34:2).

426 **Figure S2.** Model validations of biophysical properties in LION.

427 **Figure S3.** Lipidomics of CHO-k1 cells incubated with free fatty acids.

428 **Figure S4.** Lipidomics of CHO-k1 cells incubated with arachidonic acid (AA).

429 **Supplementary Data 1.** XLSX-file containing all LION-terms excluding lipids with  
430 classification rules and sources.

431 **Supplementary Data 2.** CSV-file containing all lipids present in LION.

432 **Supplementary Data 3.** CSV-file with lipid clusters.

433 **Supplementary Data 4.** CSV-file with lipidomics dataset supporting Figure 2D.

434 **Supplementary Data 5.** CSV-file with LION/web output values supporting Figure 2D.

435 **Supplementary Data 6.** CSV-file with lipidomics dataset supporting Figure 2A.

436 **Supplementary Data 7.** CSV-file with LION/web output values supporting Figure 2A.

437 **Supplementary Data 8.** XLSX-file containing the coefficients of the biophysical models.

438 **Supplementary Data 9.** CSV-file with test-set for lipid names conversion.

439 **Supplementary File 1.** LION-database in OBO-format.

440

441

442

443 **REFERENCES**

- 444 [1] M. Ashburner, C. A. Ball, J. A. Blake, D. Botstein, H. Butler, J. M. Cherry, A. P. Davis,  
445 K. Dolinski, S. S. Dwight, J. T. Eppig, M. A. Harris, D. P. Hill, L. Issel-Tarver, A.  
446 Kasarskis, S. Lewis, J. C. Matese, J. E. Richardson, M. Ringwald, G. M. Rubin, and G.  
447 Sherlock, “Gene ontology: tool for the unification of biology. The Gene Ontology  
448 Consortium,” *Nat. Genet.*, vol. 25, no. 1, pp. 25–9, May 2000.
- 449 [2] K. Degtyarenko, P. de Matos, M. Ennis, J. Hastings, M. Zbinden, A. McNaught, R.  
450 Alcántara, M. Darsow, M. Guedj, and M. Ashburner, “ChEBI: a database and ontology  
451 for chemical entities of biological interest.,” *Nucleic Acids Res.*, vol. 36, no. Database  
452 issue, pp. D344-50, Jan. 2008.
- 453 [3] H. J. Sharpe, T. J. Stevens, and S. Munro, “A comprehensive comparison of  
454 transmembrane domains reveals organelle-specific properties.,” *Cell*, vol. 142, no. 1,  
455 pp. 158–69, Jul. 2010.
- 456 [4] M. E. Inda, M. Vandenbranden, A. Fernández, D. de Mendoza, J.-M. Ruyschaert, and  
457 L. E. Cybulski, “A lipid-mediated conformational switch modulates the thermosensing  
458 activity of DesK.,” *Proc. Natl. Acad. Sci. U. S. A.*, vol. 111, no. 9, pp. 3579–84, Mar.  
459 2014.
- 460 [5] E. Sezgin, I. Levental, S. Mayor, and C. Eggeling, “The mystery of membrane  
461 organization: composition, regulation and roles of lipid rafts,” *Nat. Rev. Mol. Cell Biol.*,  
462 vol. 18, no. 6, pp. 361–374, Mar. 2017.
- 463 [6] K. Ben M’barek, D. Ajjaji, A. Chorlay, S. Vanni, L. Forêt, and A. R. Thiam, “ER  
464 Membrane Phospholipids and Surface Tension Control Cellular Lipid Droplet  
465 Formation.,” *Dev. Cell*, vol. 41, no. 6, p. 591–604.e7, Jun. 2017.
- 466 [7] A. R. Thiam, R. V Farese, and T. C. Walther, “The biophysics and cell biology of lipid  
467 droplets.,” *Nat. Rev. Mol. Cell Biol.*, vol. 14, no. 12, pp. 775–86, Dec. 2013.
- 468 [8] J. Bigay, P. Gounon, S. Robineau, and B. Antonny, “Lipid packing sensed by ArfGAP1

- 469 couples COPI coat disassembly to membrane bilayer curvature.,” *Nature*, vol. 426, no.  
470 6966, pp. 563–6, Dec. 2003.
- 471 [9] G. Enkavi, H. Mikkolainen, B. GÜngör, E. Ikonen, and I. Vattulainen, “Concerted  
472 regulation of npc2 binding to endosomal/lysosomal membranes by  
473 bis(monoacylglycero)phosphate and sphingomyelin,” *PLOS Comput. Biol.*, vol. 13, no.  
474 10, p. e1005831, Oct. 2017.
- 475 [10] E. Fahy, S. Subramaniam, R. C. Murphy, M. Nishijima, C. R. H. Raetz, T. Shimizu, F.  
476 Spener, G. van Meer, M. J. O. Wakelam, and E. A. Dennis, “Update of the LIPID MAPS  
477 comprehensive classification system for lipids.,” *J. Lipid Res.*, vol. 50 Suppl, no.  
478 Supplement, pp. S9-14, Apr. 2009.
- 479 [11] D. Marsh, “Structural and thermodynamic determinants of chain-melting transition  
480 temperatures for phospholipid and glycolipids membranes.,” *Biochim. Biophys. Acta*,  
481 vol. 1798, no. 1, pp. 40–51, Jan. 2010.
- 482 [12] T. A. Wassenaar, H. I. Ingólfsson, R. A. Böckmann, D. P. Tieleman, and S. J. Marrink,  
483 “Computational lipidomics with insane: A versatile tool for generating custom  
484 membranes for molecular simulations,” *J. Chem. Theory Comput.*, vol. 11, no. 5, pp.  
485 2144–2155, May 2015.
- 486 [13] A. Y. Andreyev, E. Fahy, Z. Guan, S. Kelly, X. Li, J. G. McDonald, S. Milne, D. Myers,  
487 H. Park, A. Ryan, B. M. Thompson, E. Wang, Y. Zhao, H. A. Brown, A. H. Merrill, C.  
488 R. H. Raetz, D. W. Russell, S. Subramaniam, and E. A. Dennis, “Subcellular organelle  
489 lipidomics in TLR-4-activated macrophages.,” *J. Lipid Res.*, vol. 51, no. 9, pp. 2785–  
490 97, Sep. 2010.
- 491 [14] R. A. Haraszti, M.-C. Didiot, E. Sapp, J. Leszyk, S. A. Shaffer, H. E. Rockwell, F. Gao,  
492 N. R. Narain, M. DiFiglia, M. A. Kiebish, N. Aronin, and A. Khvorova, “High-  
493 resolution proteomic and lipidomic analysis of exosomes and microvesicles from  
494 different cell sources,” *J. Extracell. Vesicles*, vol. 5, no. 1, p. 32570, Jan. 2016.



- 495 [15] M. S. Köberlin, B. Snijder, L. X. Heinz, C. L. Baumann, A. Fauster, G. I. Vladimer, A.  
496 C. Gavin, and G. Superti-Furga, “A Conserved Circular Network of Coregulated Lipids  
497 Modulates Innate Immune Responses,” *Cell*, vol. 162, no. 1, pp. 170–183, Jul. 2015.
- 498 [16] L. Lin, Y. Ding, Y. Wang, Z. Wang, X. Yin, G. Yan, L. Zhang, P. Yang, and H. Shen,  
499 “Functional lipidomics: Palmitic acid impairs hepatocellular carcinoma development by  
500 modulating membrane fluidity and glucose metabolism.,” *Hepatology*, vol. 66, no. 2,  
501 pp. 432–448, Aug. 2017.
- 502 [17] A. Alexa and J. Rahnenfuhrer, “Gene set enrichment analysis with topGO,”  
503 *Bioconductor*, 2017.
- 504 [18] W. T. Barry, A. B. Nobel, and F. A. Wright, “Significance analysis of functional  
505 categories in gene expression studies: a structured permutation approach.,”  
506 *Bioinformatics*, vol. 21, no. 9, pp. 1943–9, May 2005.
- 507 [19] J. C. M. Holthuis and A. K. Menon, “Lipid landscapes and pipelines in membrane  
508 homeostasis.,” *Nature*, vol. 510, no. 7503, pp. 48–57, Jun. 2014.
- 509 [20] G. van Meer, D. R. Voelker, and G. W. Feigenson, “Membrane lipids: where they are  
510 and how they behave.,” *Nat. Rev. Mol. Cell Biol.*, vol. 9, no. 2, pp. 112–24, Feb. 2008.
- 511 [21] P. C. Calder, “Marine omega-3 fatty acids and inflammatory processes: Effects,  
512 mechanisms and clinical relevance.,” *Biochim. Biophys. Acta*, vol. 1851, no. 4, pp. 469–  
513 84, Apr. 2015.
- 514 [22] X. Yang, W. Sheng, G. Y. Sun, and J. C. M. Lee, “Effects of fatty acid unsaturation  
515 numbers on membrane fluidity and  $\alpha$ -secretase-dependent amyloid precursor protein  
516 processing.,” *Neurochem. Int.*, vol. 58, no. 3, pp. 321–9, Feb. 2011.
- 517 [23] J. Eisinger and S. F. Scarlata, “The lateral fluidity of erythrocyte membranes  
518 temperature and pressure dependence,” *Biophys. Chem.*, vol. 28, no. 3, pp. 273–281,  
519 Dec. 1987.
- 520 [24] D. Schwudke, A. Shevchenko, N. Hoffmann, and R. Ahrends, “Lipidomics informatics

- 521 for life-science,” *J. Biotechnol.*, vol. 261, pp. 131–136, Nov. 2017.
- 522 [25] L. Aimo, R. Liechti, N. Hyka-Nouspikel, A. Niknejad, A. Gleizes, L. Götz, D.  
523 Kuznetsov, F. P. A. David, F. G. van der Goot, H. Riezman, L. Bougueleret, I. Xenarios,  
524 and A. Bridge, “The SwissLipids knowledgebase for lipid biology.,” *Bioinformatics*,  
525 vol. 31, no. 17, pp. 2860–6, Sep. 2015.
- 526 [26] A. I. P. M. de Kroon, P. J. Rijken, and C. H. De Smet, “Checks and balances in membrane  
527 phospholipid class and acyl chain homeostasis, the yeast perspective.,” *Prog. Lipid Res.*,  
528 vol. 52, no. 4, pp. 374–94, Oct. 2013.
- 529 [27] S. J. Marrink, A. H. de Vries, and A. E. Mark, “Coarse Grained Model for  
530 Semiquantitative Lipid Simulations,” *J. Phys. Chem. B*, vol. 108, no. 2, pp. 750–760,  
531 2004.
- 532 [28] T. Wächter and M. Schroeder, “Semi-automated ontology generation within OBO-  
533 Edit.,” *Bioinformatics*, vol. 26, no. 12, pp. i88-96, Jun. 2010.
- 534 [29] E. G. Bligh and W. J. Dyer, “A rapid method of total lipid extraction and purification,”  
535 *Can. J. Biochem. Physiol.*, vol. 37, no. 8, pp. 911–917, Aug. 1959.
- 536 [30] R. Adusumilli and P. Mallick, “Data Conversion with ProteoWizard msConvert.,”  
537 *Methods Mol. Biol.*, vol. 1550, pp. 339–368, 2017.
- 538 [31] C. A. Smith, E. J. Want, G. O’Maille, R. Abagyan, and G. Siuzdak, “XCMS: processing  
539 mass spectrometry data for metabolite profiling using nonlinear peak alignment,  
540 matching, and identification.,” *Anal. Chem.*, vol. 78, no. 3, pp. 779–87, Feb. 2006.
- 541 [32] J. Xia, I. V. Sinelnikov, B. Han, and D. S. Wishart, “MetaboAnalyst 3.0--making  
542 metabolomics more meaningful.,” *Nucleic Acids Res.*, vol. 43, no. W1, pp. W251-7, Jul.  
543 2015.
- 544 [33] A. Y. Andreyev, E. Fahy, Z. Guan, S. Kelly, X. Li, J. G. McDonald, S. Milne, D. Myers,  
545 H. Park, A. Ryan, B. M. Thompson, E. Wang, Y. Zhao, H. A. Brown, A. H. Merrill, C.  
546 R. H. Raetz, D. W. Russell, S. Subramaniam, and E. A. Dennis, “Subcellular organelle

547 lipidomics in TLR-4-activated macrophages.,” *J. Lipid Res.*, vol. 51, no. 9, pp. 2785–  
548 97, Sep. 2010. Supplemental data 1.  
549 <http://www.jlr.org/content/suppl/2010/06/23/jlr.M008748.DC1/jlr.M008748-1.xls>.  
550 Accessed 9 Jan 2018.

551 [34] topOnto R-package. <https://github.com/hxin/topOnto> . Accessed 26 Nov 2017.

552 [35] LION-database R-package. <https://github.com/martijnmolenaar/topOnto.LION2.db>.  
553 Accessed 10 April 2019.

554 [36] Molenaar MR; Jeucken A; Wassenaar TA; van de Lest CHA; Brouwers JF; Helms JB:  
555 Supporting data for "LION/web: a web-based ontology enrichment tool for lipidomic  
556 data analysis" *GigaScience* Database. 2019. <http://dx.doi.org/10.5524/100599>

557

558

559

## 560 **FIGURE LEGENDS**

561 **Figure 1. Enrichment analysis approaches supported by LION/web.** A lipidomics dataset  
562 containing lipid identifiers and abundances derived from two or more conditions (1) can be  
563 processed by LION/web in two ways. In the ‘target-list mode’ (left, 2), a subset of lipids  
564 (*e.g.*, derived from thresholding or clustering) is compared to the total set of lipids. After  
565 standardization of lipid nomenclature (3), applicable LION-terms are associated and assessed  
566 for enrichment in the subset by Fisher’s exact statistics. In the ‘ranking mode’, input lipids are  
567 ranked by numeric values (‘local’ statistics) (2). After ranking, lipid nomenclature is  
568 standardized (3). Applicable LION-terms are subsequently associated to the dataset and  
569 distributions are compared to a uniform distribution by ‘global’ statistics (here, Kolmogorov–  
570 Smirnov tests). Calculated *P* values of LION-terms from both modes are corrected for  
571 multiple testing (Benjamini-Hochberg).

572

573 **Figure 2. LION-term enrichment analysis of RAW 264.7 macrophages.** (A) Heatmap of  
574 scaled lipid amounts (z-score < 0: blue, z-score > 0: red) of subcellular lipidomics data [13]  
575 with samples on the x-axis and individual lipid species on the y-axis. Lipids were clustered  
576 into 10 groups by hierarchical clustering. (B) Enrichment analyses of all lipid clusters in the  
577 ‘target-list mode’. For each cluster, the first  $n + 2$  significant LION-terms are shown. (C)  
578 Enrichment analysis of PM vs. ER fractions in the ‘ranking mode’. The gray vertical lines  
579 indicate the cut-off value of significant enrichments ( $q < 0.05$ ). Bar colors are scaled with the  
580 enrichment ( $-\log q$ -values).

581

582

583 **Figure 3. LION-term enrichment and membrane fluidity of CHO-k1 cells.** CHO-k1 cells  
584 were incubated overnight with PA, LA or AA (100  $\mu$ M) (**A**) or with AA (250  $\mu$ M) (**B-D**). All  
585 incubations were performed in triplicate. For control incubations, cells were incubated with  
586 fatty-acid free BSA. (**A,D**) After extraction and lipidomics profiling by LC-MS/MS,  
587 enrichment analyses of the conditions of interest versus control incubations were performed  
588 by LION/web of (**A**) LION-terms indicating the presence of selected fatty acids or (**D**) LION-  
589 terms indicating the degree of membrane fluidity. Dot sizes in the dot plots are scaled to the  
590 number of associated lipids; colors are scaled to the level of enrichment ( $-\log q$ -values). (**B,C**)  
591 After incubation, fluorescence emission spectra of lysates containing pyrenedecanoic acid  
592 (PDA) were measured (**B**). Fluorescence spectra examples of either control (black) or AA-  
593 stimulated lysates (red). Gray shades indicate monomer and excimer fluorescence filters. (**C**)  
594 Mean ratios (bar) and individual datapoints (dots) of excimer over monomer fluorescence  
595 (representative data of three independent experiments). Statistical significance was  
596 determined by Student's two-tailed t-test. (**A,C,D**) \*  $P$  or  $q < 0.05$ , \*\*  $P$  or  $q < 0.01$ , \*\*\*  $P$  or  
597  $q < 0.001$ .

598

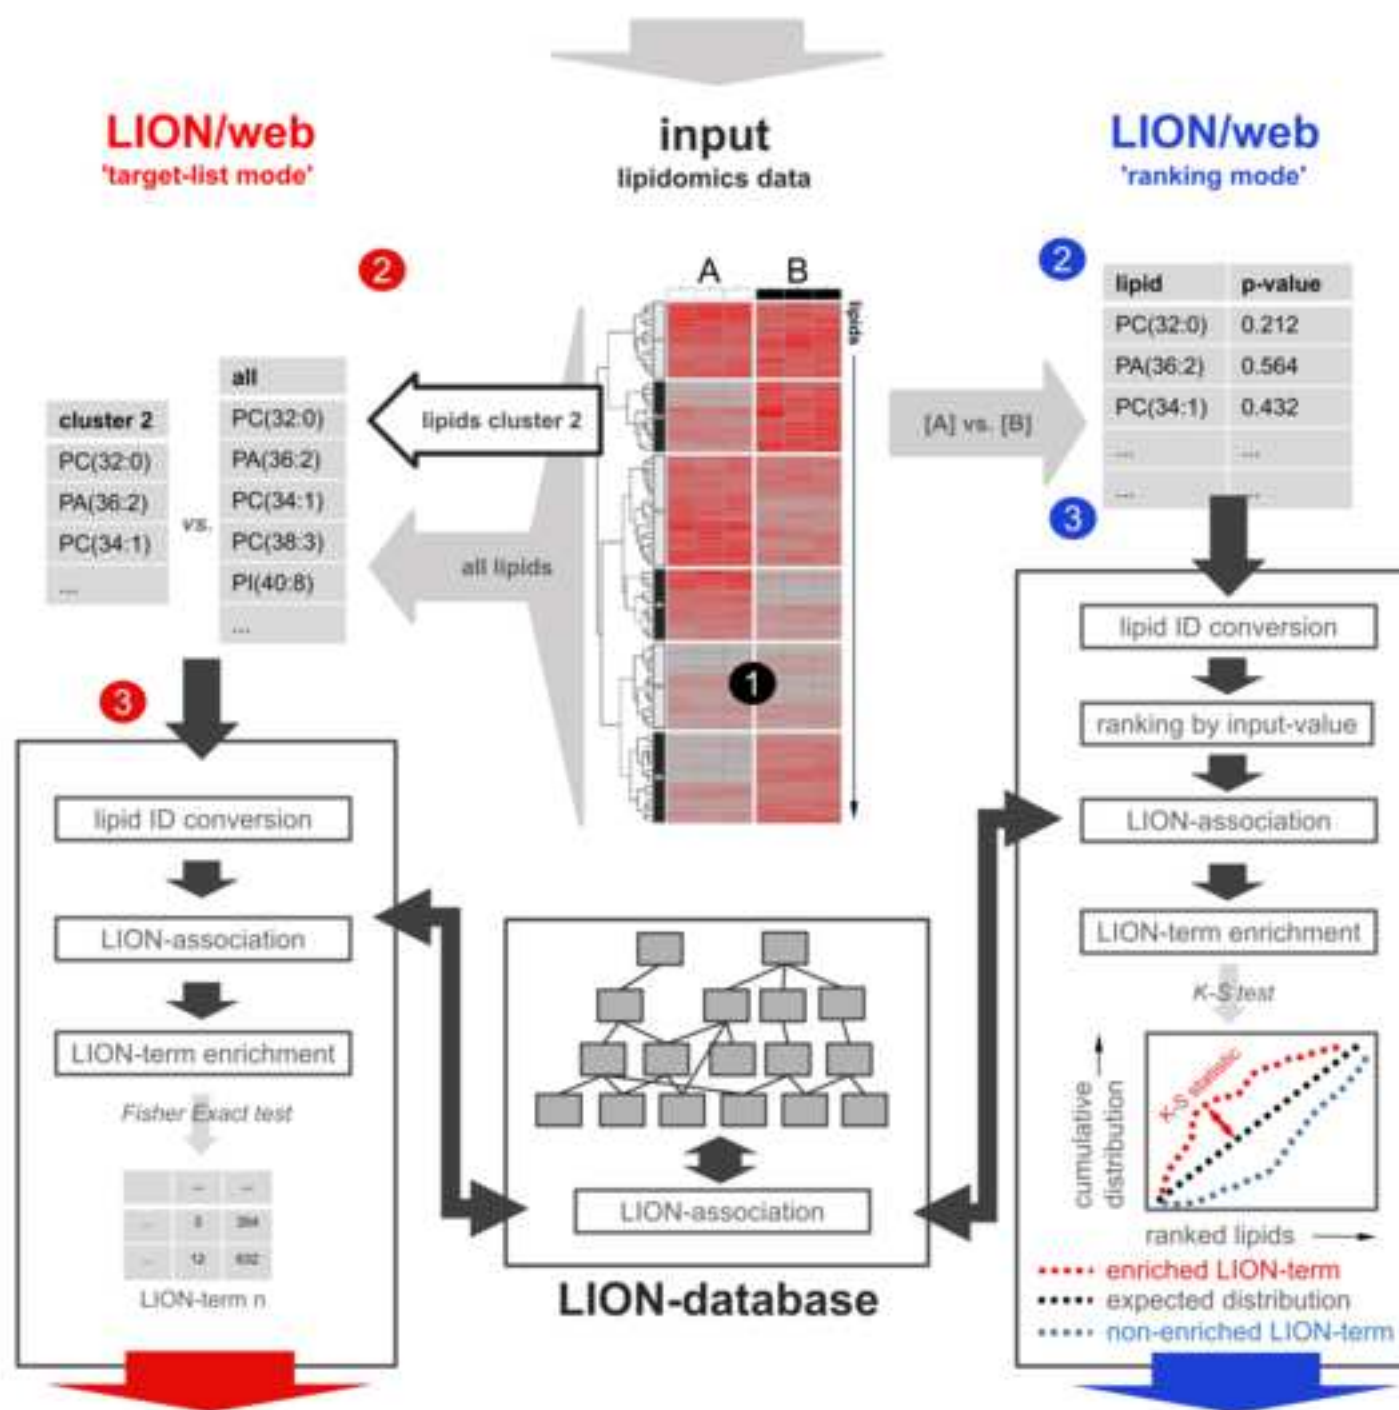

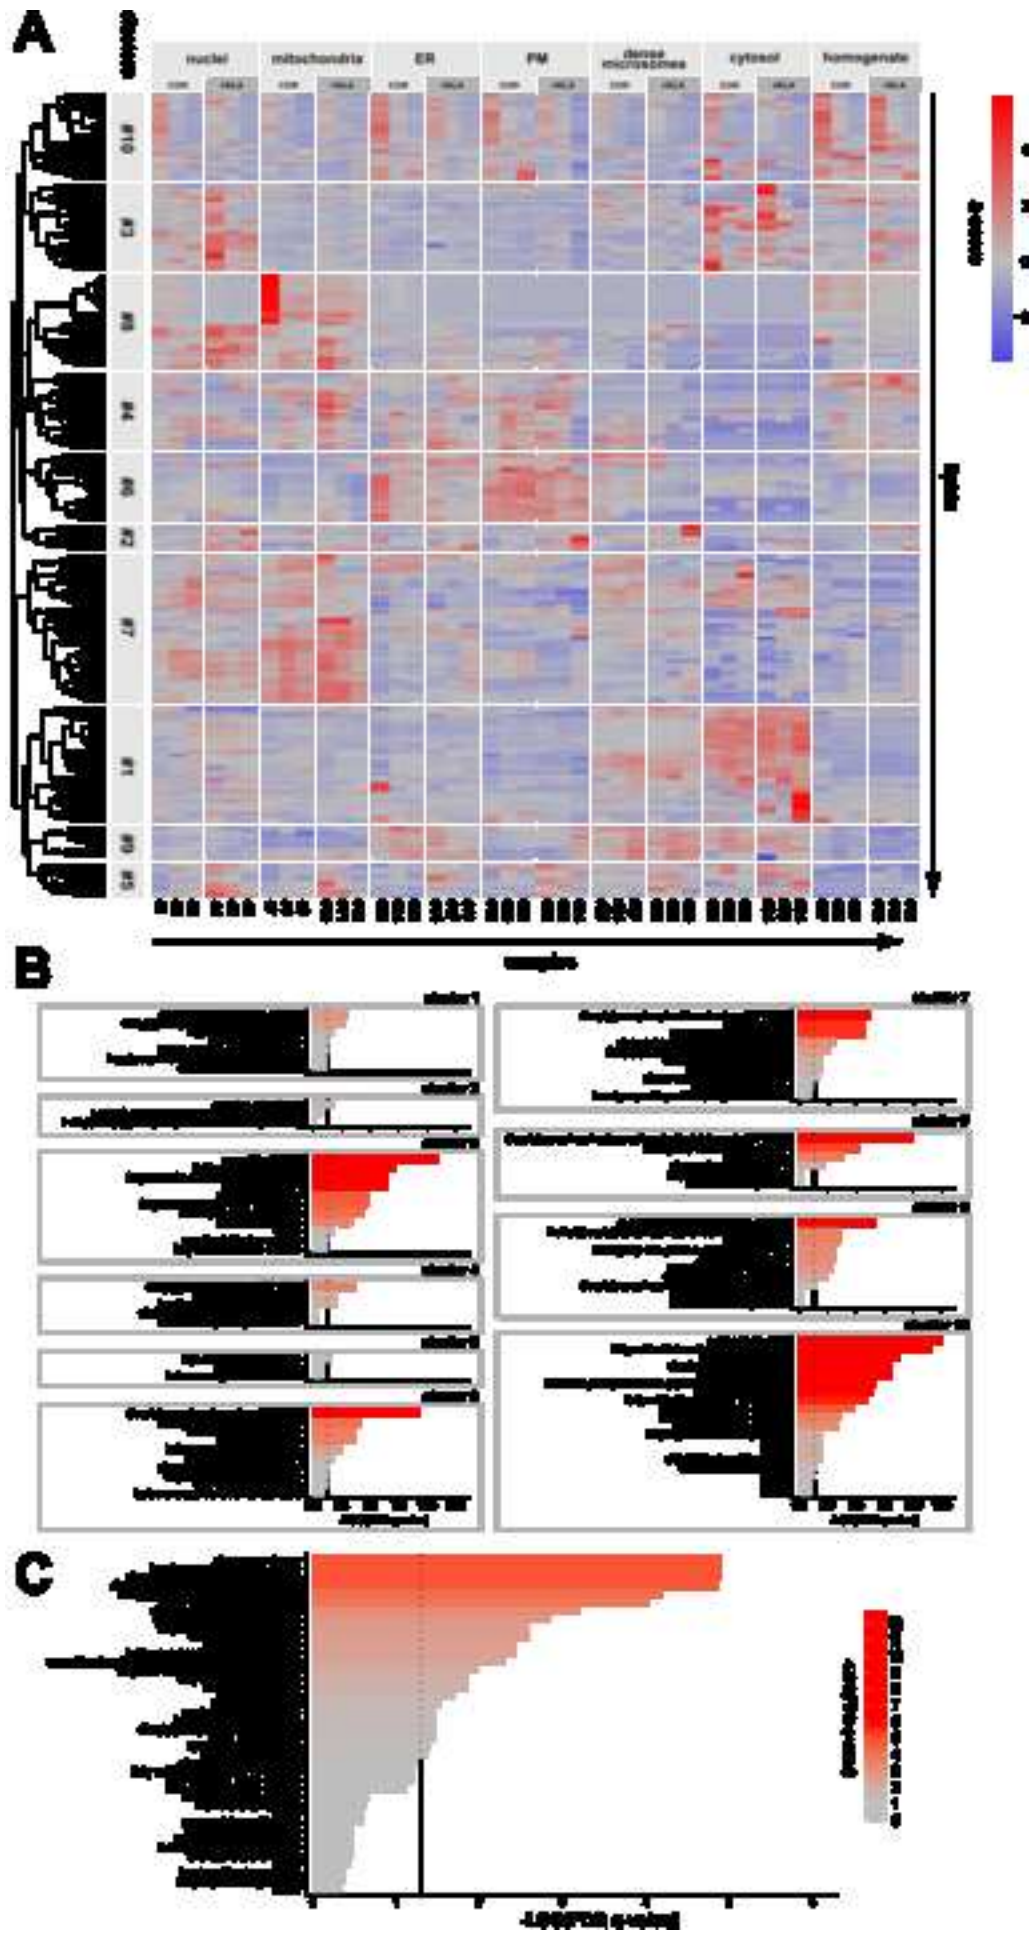





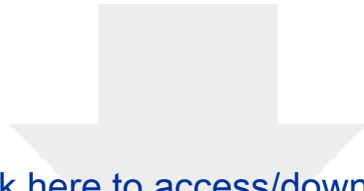

[Click here to access/download](#)

**Supplementary Material**

20190226 LION Supplement\_after review final.docx

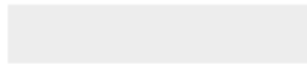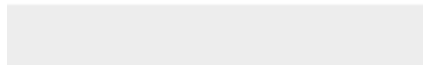



Click here to access/download  
**Supplementary Material**  
Figure S1.png



Click here to access/download  
**Supplementary Material**  
Figure S2.png



Click here to access/download  
**Supplementary Material**  
Figure S3.png



Click here to access/download  
**Supplementary Material**  
Figure S4.png

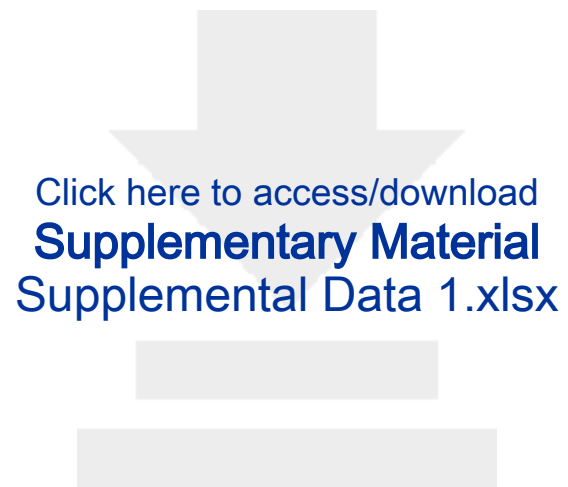

Click here to access/download  
**Supplementary Material**  
Supplemental Data 1.xlsx

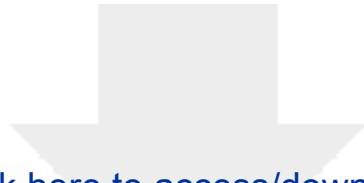

Click here to access/download  
**Supplementary Material**  
Supplemental Data 2.csv

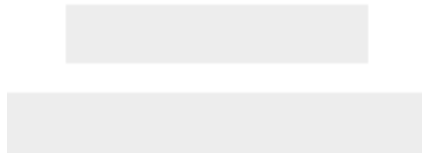

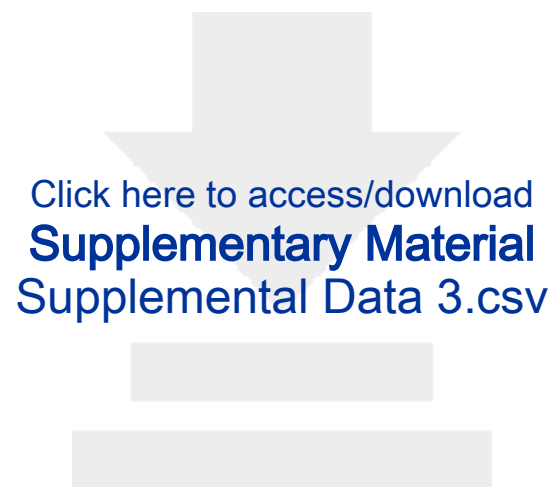

Click here to access/download  
**Supplementary Material**  
Supplemental Data 3.csv



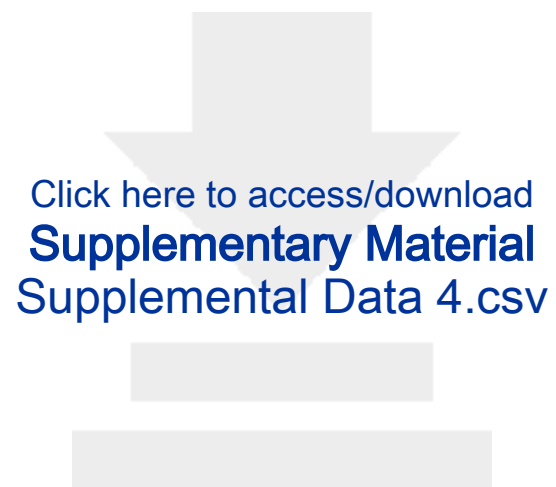

Click here to access/download  
**Supplementary Material**  
Supplemental Data 4.csv



Click here to access/download  
**Supplementary Material**  
Supplemental Data 5.csv

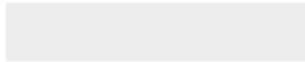

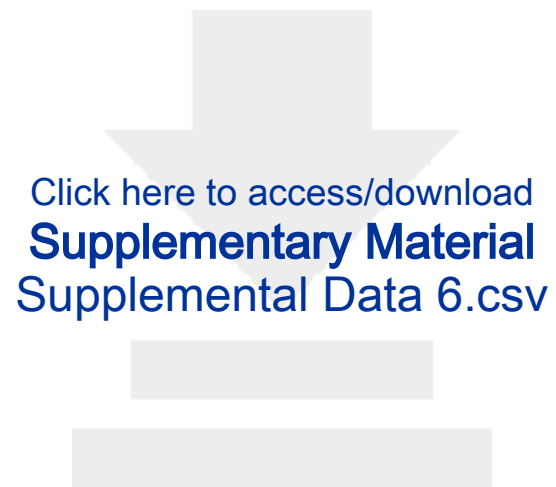

Click here to access/download  
**Supplementary Material**  
Supplemental Data 6.csv

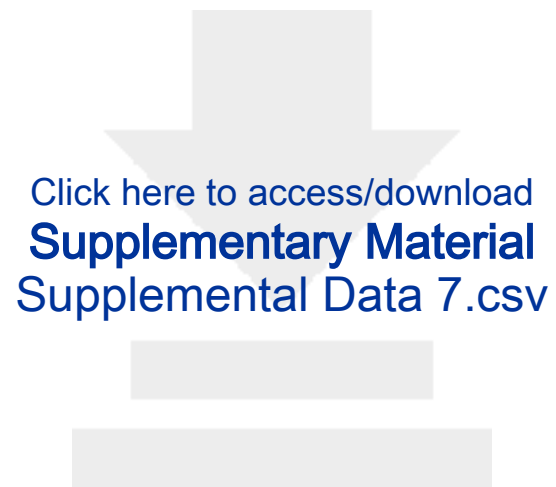

Click here to access/download  
**Supplementary Material**  
Supplemental Data 7.csv

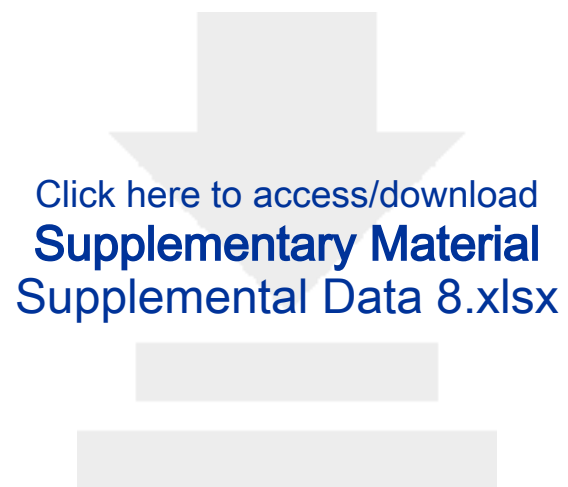

Click here to access/download  
**Supplementary Material**  
Supplemental Data 8.xlsx

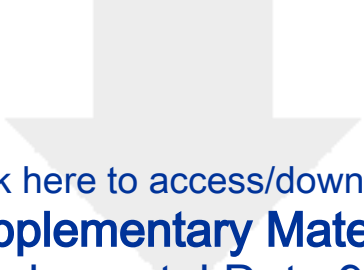

Click here to access/download  
**Supplementary Material**  
Supplemental Data 9.csv



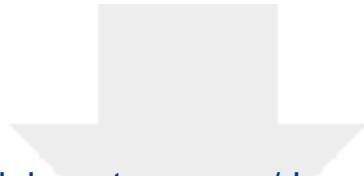

Click here to access/download  
**Supplementary Material**  
Supplemental File 1 LION.obo

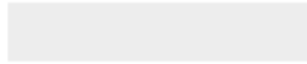

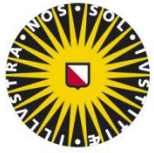

Universiteit Utrecht

**GigaScience**

**The Editor**

Nicole Nogoy, Ph.D

Faculty of Veterinary Medicine  
Department of Biochemistry  
and Cell Biology  
PO Box 80176  
3508 TD Utrecht  
The Netherlands  
Tel: +31-30-2535375  
Fax: +31-30-2535492  
Email: j.b.helms@uu.nl

April 12, 2019

Dear Nicole Nogoy,

Please find enclosed our second revised manuscript GIGA-D-18-00357R1 entitled "LION/web: a web-based ontology enrichment tool for lipidomic data analysis" by Martijn Molenaar et al.

Attached you will find a Point-by-Point answer to the comments to address the final revisions suggested by our reviewers. We thank the reviewers for their helpful comments that have helped to improve the quality of this manuscript.

We hope you find the manuscript now suitable for publication in GigaScience.

With kind regards



Prof. Dr. J.B. Helms
